# Supplementary material for: Chemical synthesis of 6-deoxy-d-talose containing a tetrasaccharide repeating unit of the O-specific polysaccharide from Enterobacter cloacae G3422 in the form of its 2-aminoethyl glycoside
Source: Royal Society of Chemistry journal article supplement (doi:10.1039/d4ob00183d), 2024-01-01

## **SUPPORTING INFORMATION**

### **Chemical synthesis of the 6-deoxy-D-talose containing tetrasaccharide repeating unit of the O-specific polysaccharide from *Enterobacter cloacae* G3422 in the form of its 2-aminoethyl glycoside**

Subrata Das, Sanajit Maiti and Balaram Mukhopadhyay

*Sweet Lab, Department of Chemical Sciences, Indian Institute of Science Education  
and Research Kolkata, Mohanpur, Nadia 741246, India*

GROUP BM  
 BM-SBD-SD12 in CDCl3

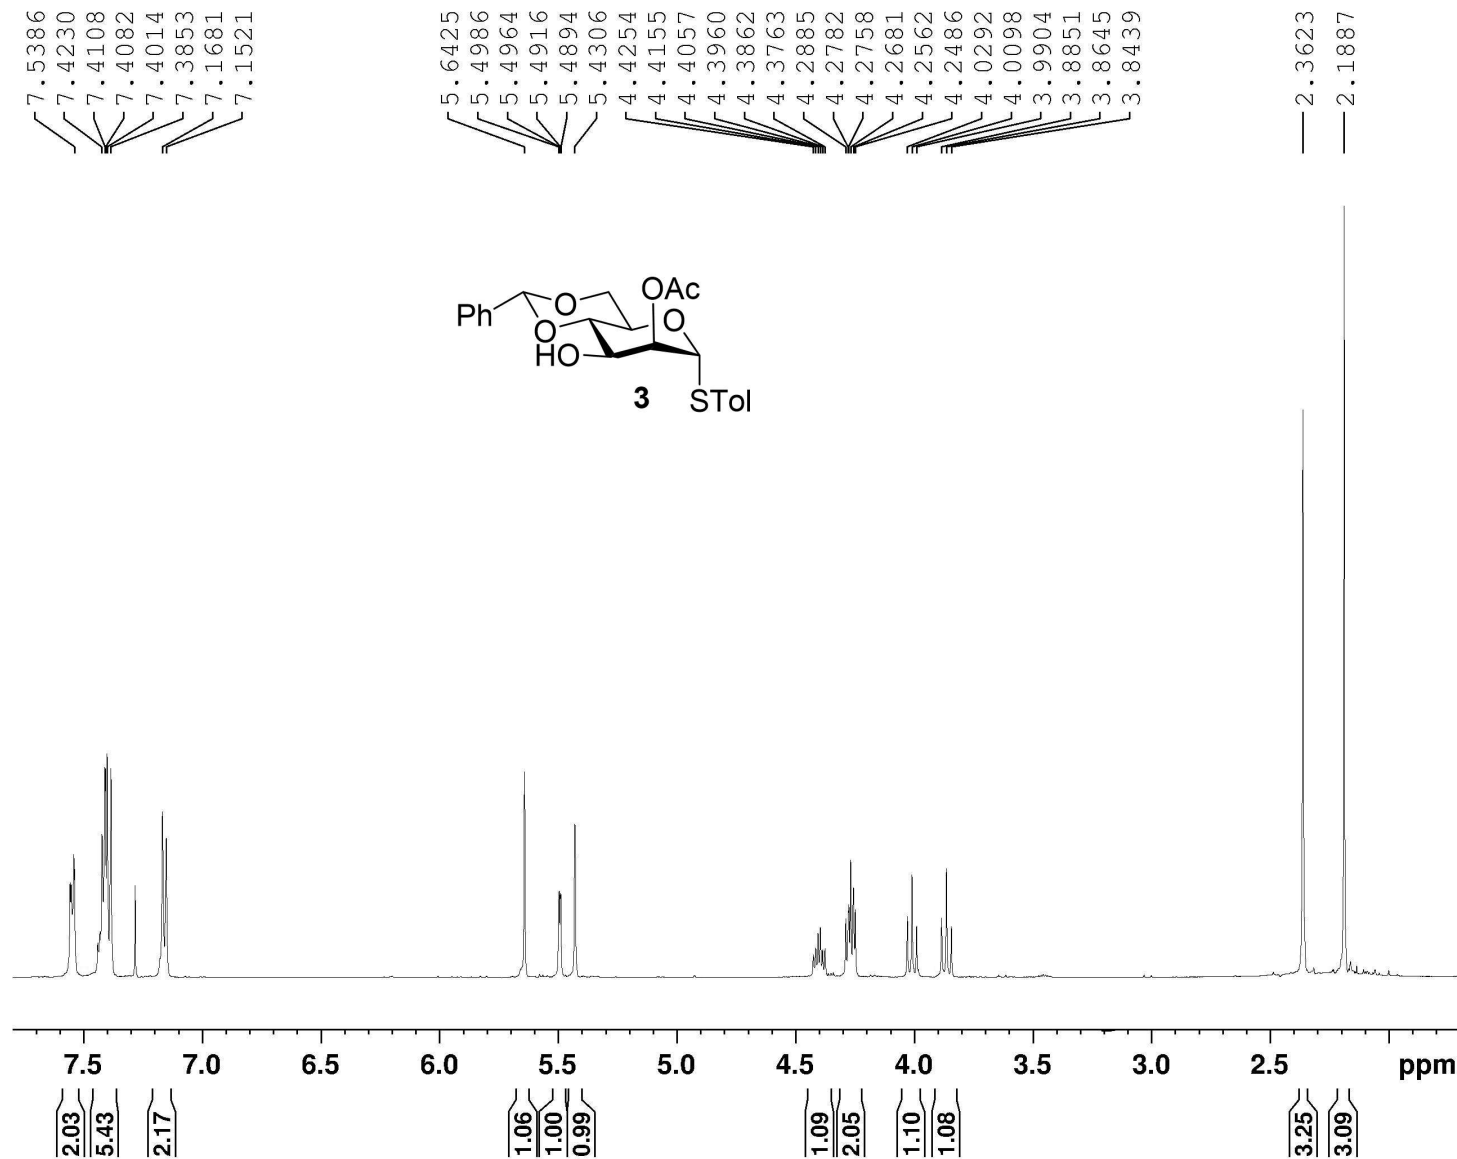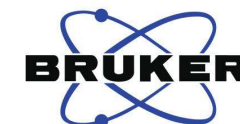

Current Data Parameters  
 NAME BM-SBD-SD12  
 EXPNO 240  
 PROCNO 1

F2 - Acquisition Parameters  
 Date\_ 20220502  
 Time 13.21 h  
 INSTRUM AV4 500MHz  
 PROBHD Z119467\_0011 ( )  
 PULPROG zg30  
 TD 40000  
 SOLVENT CDCl3  
 NS 8  
 DS 0  
 SWH 10000.000 Hz  
 FIDRES 0.500000 Hz  
 AQ 2.0000000 sec  
 RG 101  
 DW 50.000 usec  
 DE 10.11 usec  
 TE 299.2 K  
 D1 1.00000000 sec  
 TD0 1  
 SFO1 500.1430884 MHz  
 NUC1 1H  
 P0 4.67 usec  
 P1 14.00 usec  
 PLW1 13.47399998 W

F2 - Processing parameters  
 SI 65536  
 SF 500.1400000 MHz  
 WDW EM  
 SSB 0  
 LB 0.30 Hz  
 GB 0  
 PC 1.00

GROUP BM  
BM-SBD-SD12 in CDCl<sub>3</sub>

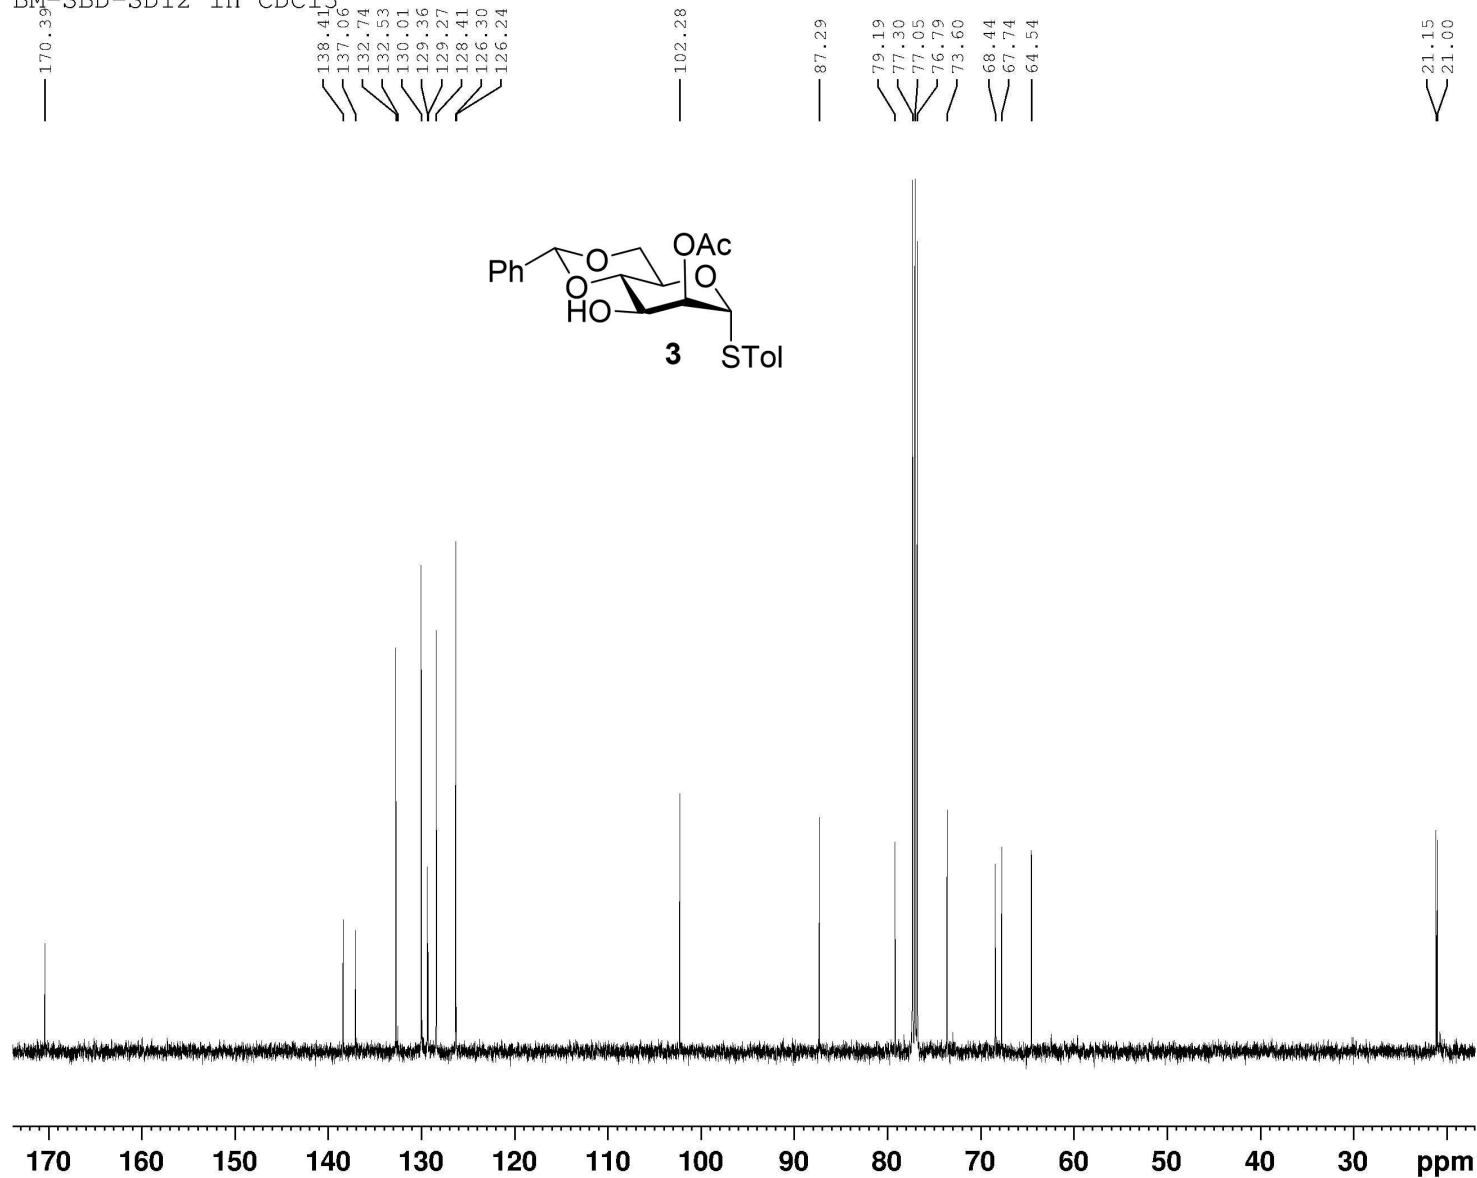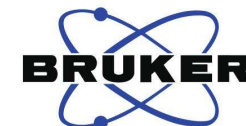

Current Data Parameters  
NAME BM-SBD-SD12  
EXNO 241  
PROCNO 1

F2 - Acquisition Parameters  
Date\_ 20220502  
Time 13.29 h  
INSTRUM AV4 500MHz  
PROBHD Z119467\_0011 (  
PULPROG zgpg30  
TD 65536  
SOLVENT CDCl3  
NS 128  
DS 4  
SWH 30120.482 Hz  
FIDRES 0.919204 Hz  
AQ 1.0878977 sec  
RG 101  
DW 16.600 usec  
DE 6.50 usec  
TE 299.9 K  
D1 2.00000000 sec  
D11 0.03000000 sec  
TD0 1  
SFO1 125.7728791 MHz  
NUC1 13C  
P0 3.33 usec  
P1 10.00 usec  
PLW1 77.33000183 W  
SFO2 500.1420006 MHz  
NUC2 1H  
CPDPRG[2] waltz65  
PCPD2 80.00 usec  
PLW2 13.47399998 W  
PLW12 0.41264001 W  
PLW13 0.20756000 W

F2 - Processing parameters  
SI 32768  
SF 125.7603030 MHz  
WDW EM  
SSB 0  
LB 1.00 Hz  
GB 0  
PC 1.40

GROUP BM  
 BM-SBD-SD18 in CDCl3

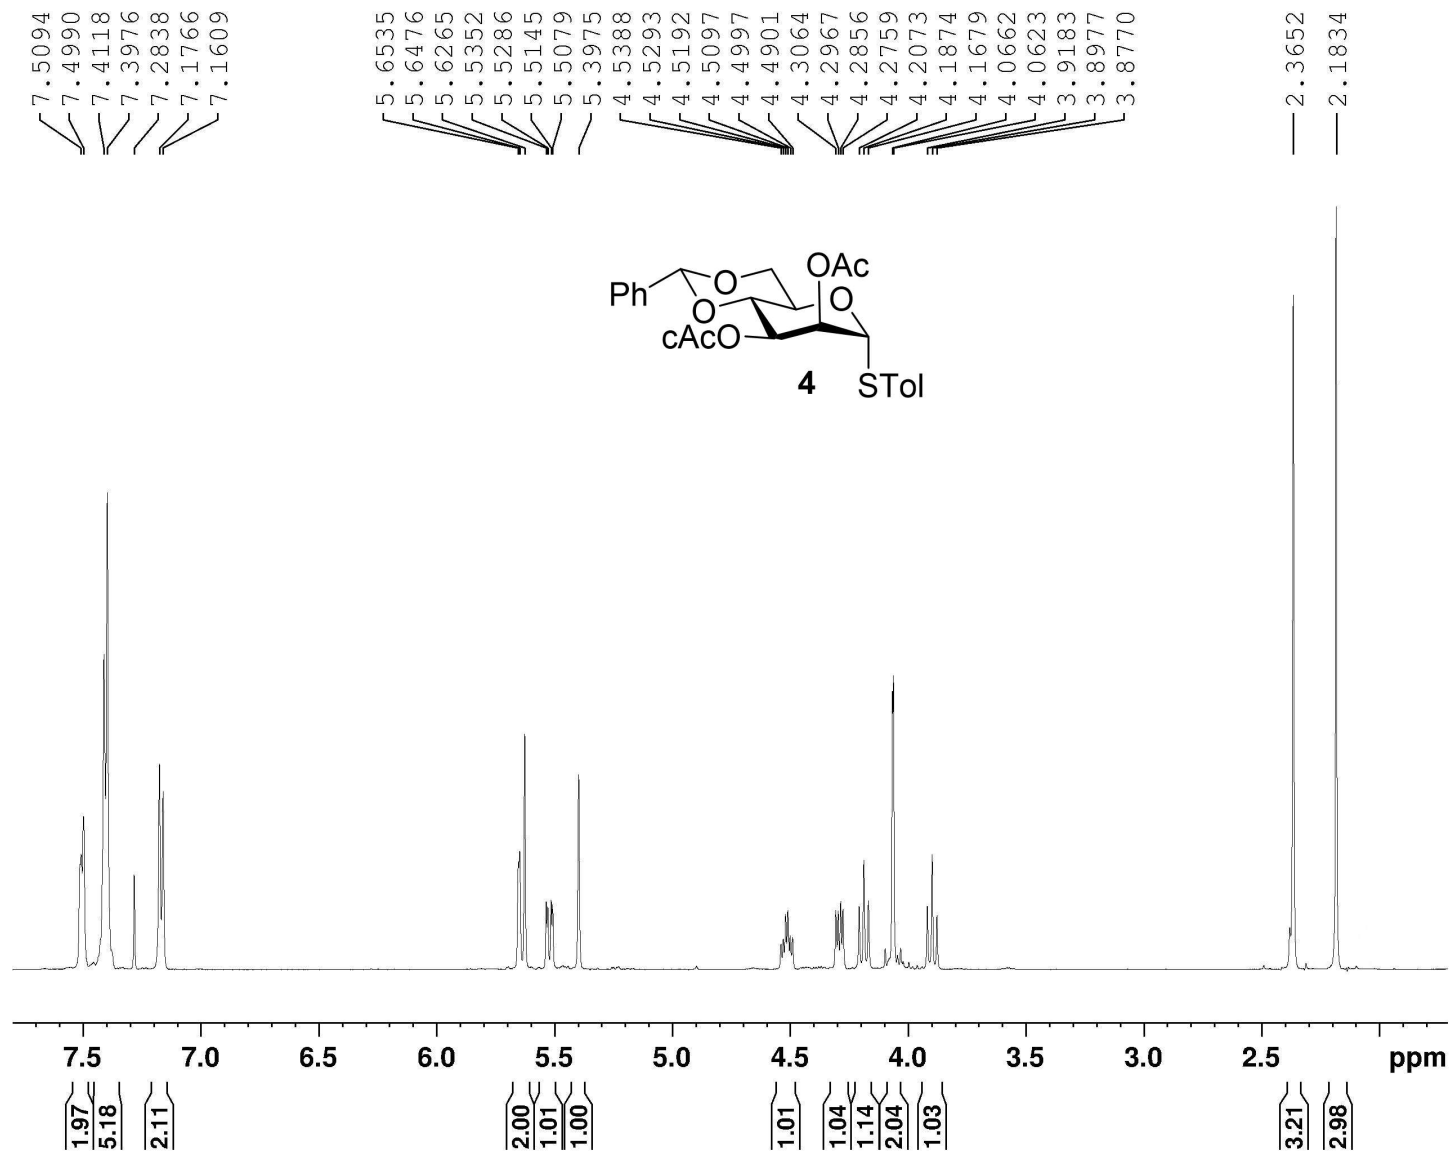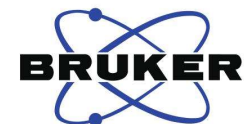

Current Data Parameters  
 NAME BM-SBD-SD18  
 EXPNO 400  
 PROCNO 1

F2 - Acquisition Parameters  
 Date\_ 20220520  
 Time 13.41 h  
 INSTRUM AV4 500MHz  
 PROBHD z119467\_0011 ( )  
 PULPROG zg30  
 TD 40000  
 SOLVENT CDCl3  
 NS 8  
 DS 0  
 SWH 10000.000 Hz  
 FIDRES 0.500000 Hz  
 AQ 2.0000000 sec  
 RG 101  
 DW 50.000 usec  
 DE 10.11 usec  
 TE 301.5 K  
 D1 1.00000000 sec  
 TD0 1  
 SFO1 500.1430884 MHz  
 NUC1 1H  
 P0 4.67 usec  
 P1 14.00 usec  
 PLW1 13.47399998 W

F2 - Processing parameters  
 SI 65536  
 SF 500.1400000 MHz  
 WDW EM  
 SSB 0  
 LB 0.10 Hz  
 GB 0  
 PC 1.00

GROUP BM  
BM-SBD-SD18 in CDCl3

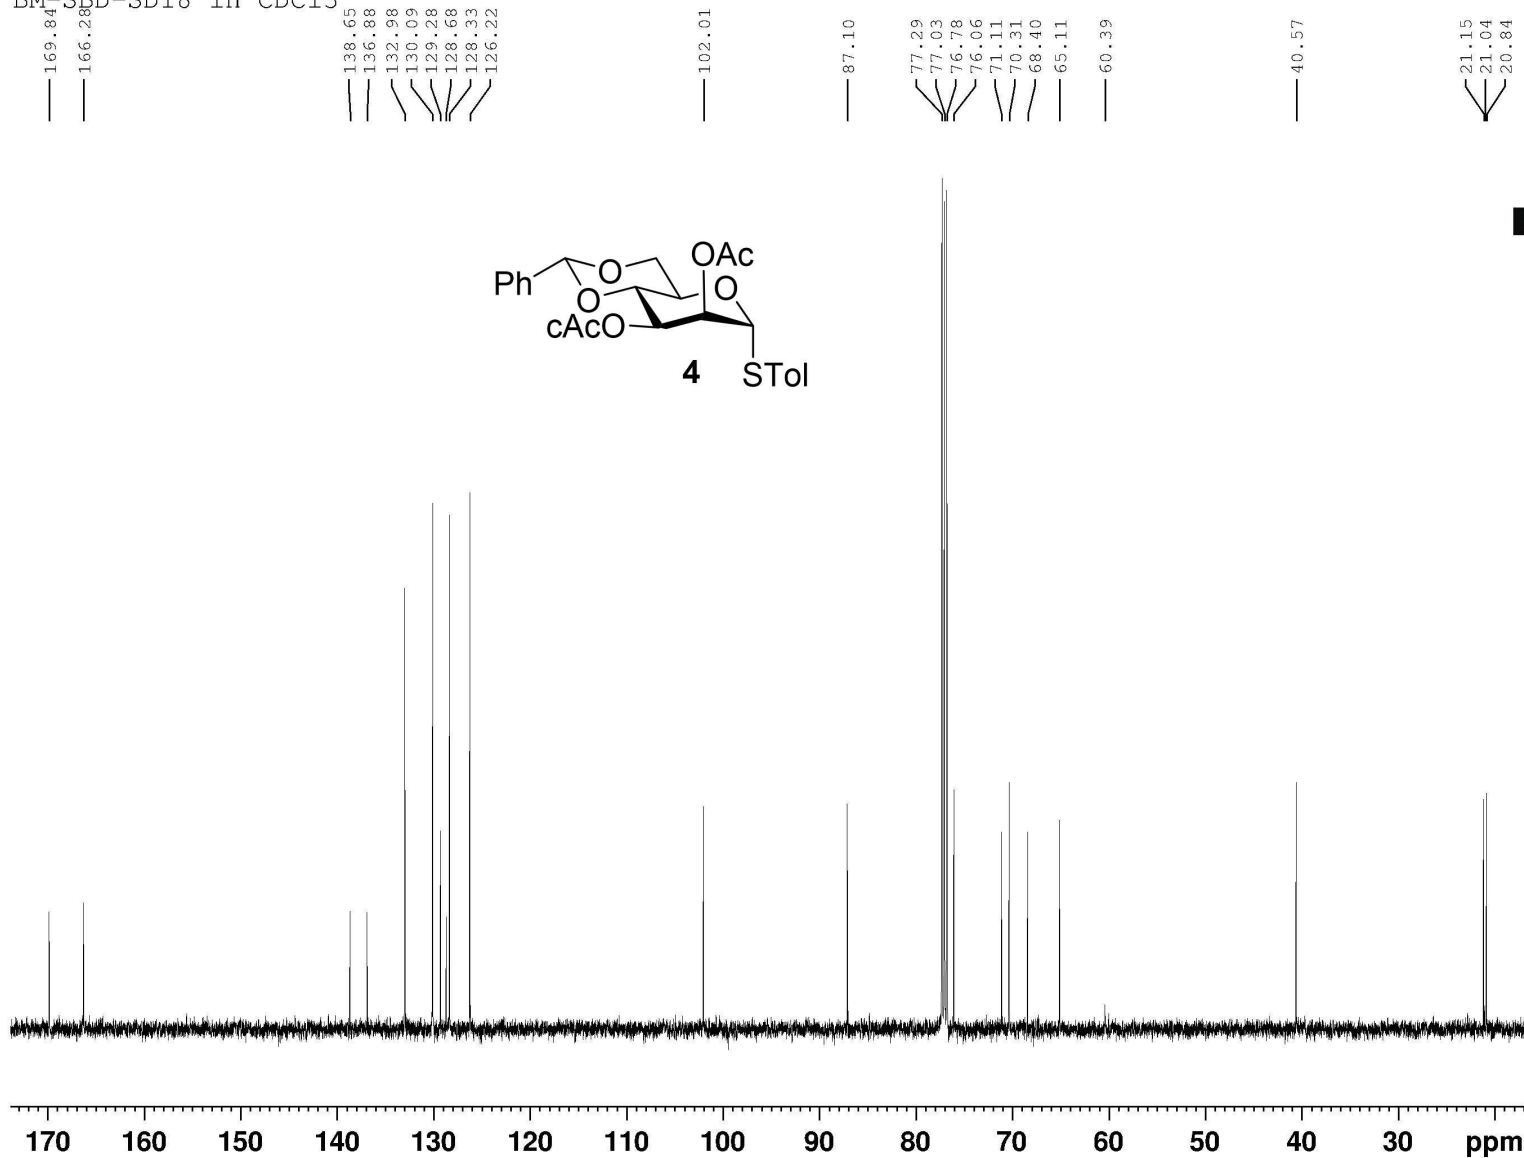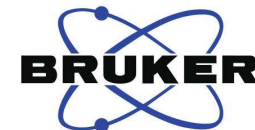

Current Data Parameters  
NAME BM-SBD-SD18  
EXPNO 401  
PROCNO 1

F2 - Acquisition Parameters  
Date\_ 20220520  
Time 13.50 h  
INSTRUM AV4 500MHz  
PROBHD Z119467\_0011 (4  
PULPROG zgpg30  
TD 65536  
SOLVENT CDCl3  
NS 128  
DS 4  
SWH 30120.492 Hz  
FIDRES 0.919204 Hz  
AQ 1.0878977 sec  
RG 101  
DW 16.600 usec  
DE 6.50 usec  
TE 302.5 K  
D1 2.0000000 sec  
D11 0.0300000 sec  
TD0 1  
SFO1 125.7728791 MHz  
NUC1 13C  
P0 3.33 usec  
P1 10.00 usec  
PLW1 77.33000193 W  
SFO2 500.1420006 MHz  
NUC2 1H  
CPDPRG[2] waltz65  
PCPD2 80.00 usec  
PLW2 13.47399998 W  
PLW12 0.41264001 W  
PLW13 0.20756000 W

F2 - Processing parameters  
SI 32768  
SF 125.7603030 MHz  
WDW EM  
SSB 0  
LB 1.00 Hz  
GB 0  
PC 1.40

GROUP BM  
 BM-BED-SD07 in CDCl3  
 COSY

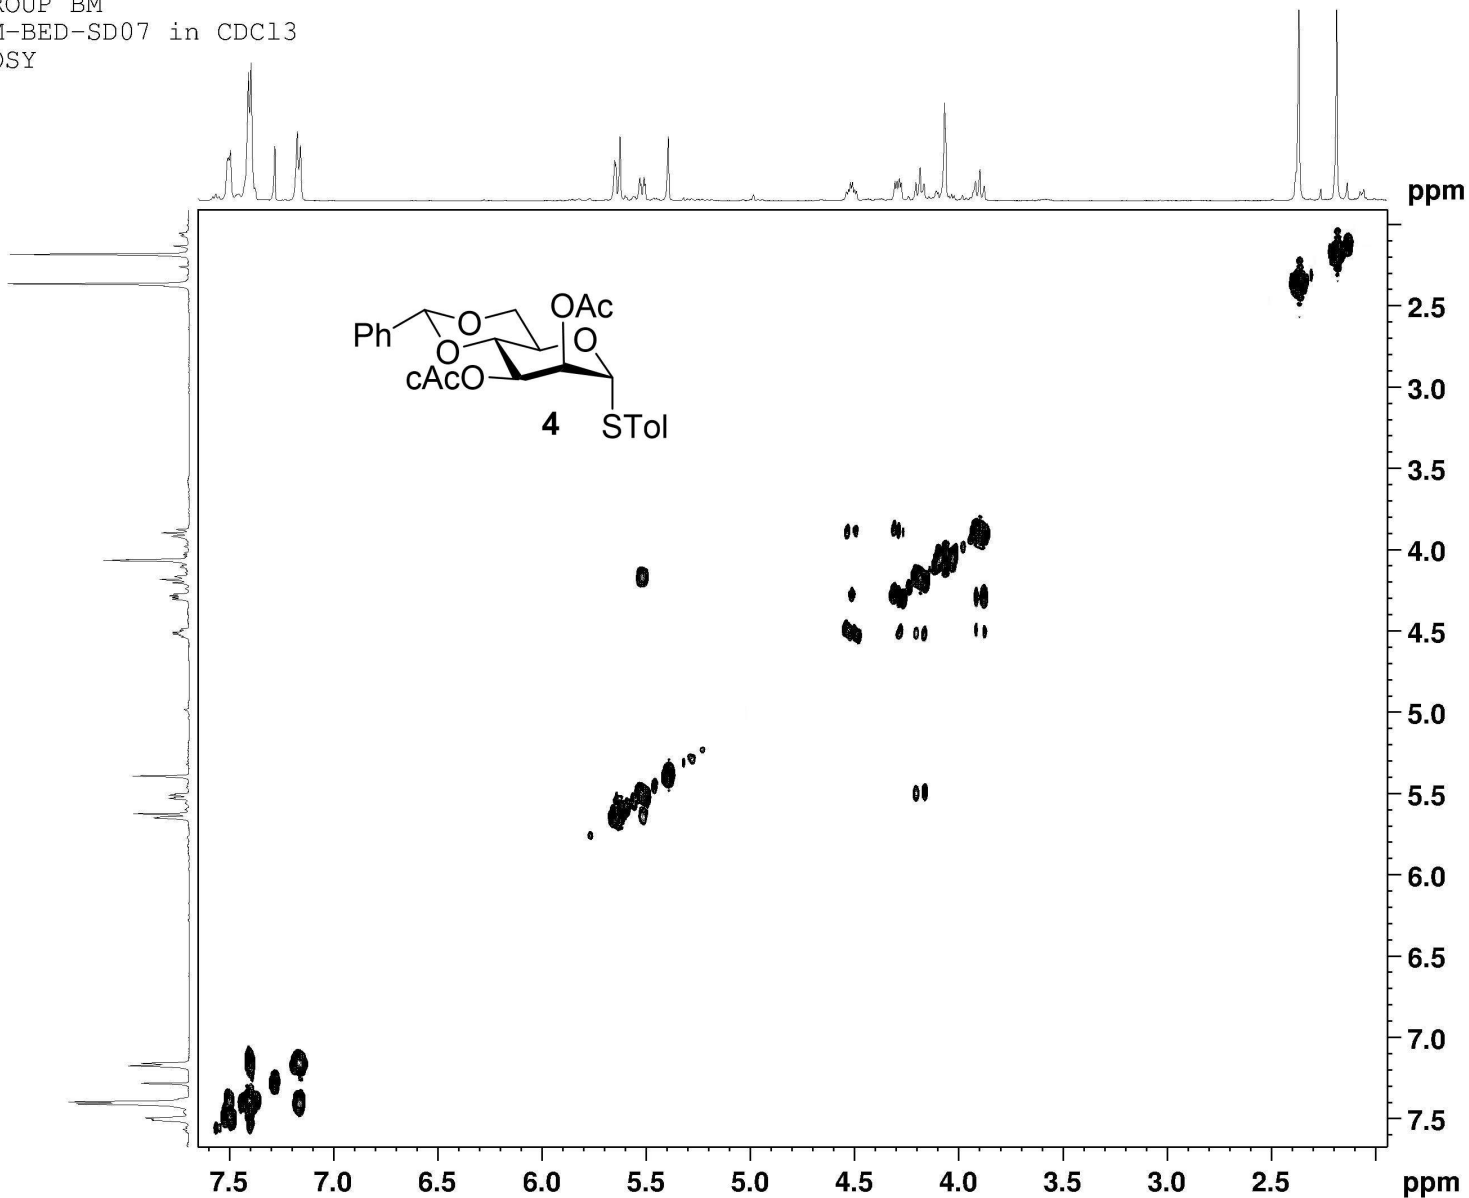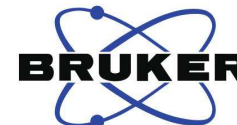

```

Current Data Parameters
NAME      BM-BED-SD07
EXPNO    452
PROCNO   1

F2 - Acquisition Parameters
Date_    20220123
Time     19.24
INSTRUM  Bruker_default_av500
PROBHD   5 mm PABBO BBO
PULPROG  cosygpppf
TD       2048
SOLVENT  CDCl3
NS       1
DS       8
SWH      5000.000 Hz
FIDRES   2.441406 Hz
AQ       0.2048000 sec
RG       22.6
DM       100.000 usec
DE       6.50 usec
TE       1541.5 K
DO       0.0000300 sec
D1       2.00000000 sec
D11      0.03000000 sec
D12      0.00002000 sec
D13      0.00004000 sec
D16      0.00020000 sec
INO      0.00019980 sec

===== CHANNEL f1 =====
SF01    500.4525023 MHz
NUC1     1H
P0       30.00 usec
P1       30.00 usec
PL1      2500.00 usec
PLW1     10.00000000 W
PLW10    3.40280008 W

===== GRADIENT CHANNEL =====
GPRAM(1) SMC10.100
GPE1     10.00 %
P16      1000.00 usec

F1 - Acquisition parameters
TD       128
SF01    500.4525 MHz
FIDRES   78.293201 Hz
SW       10.001 ppm
FhMODE   QF

F2 - Processing parameters
SI       1024
SF       500.4500000 MHz
WDW      QSINE
SSB      0
LB       0 Hz
GB       0
PC       1.00

F1 - Processing parameters
SI       1024
MC2     QF
SF       500.4500000 MHz
WDW      QSINE
SSB      0
LB       0 Hz
GB       0
  
```

GROUP BM  
 BM-BED-SD07 in CDCl3  
 HSQC

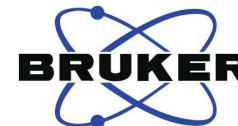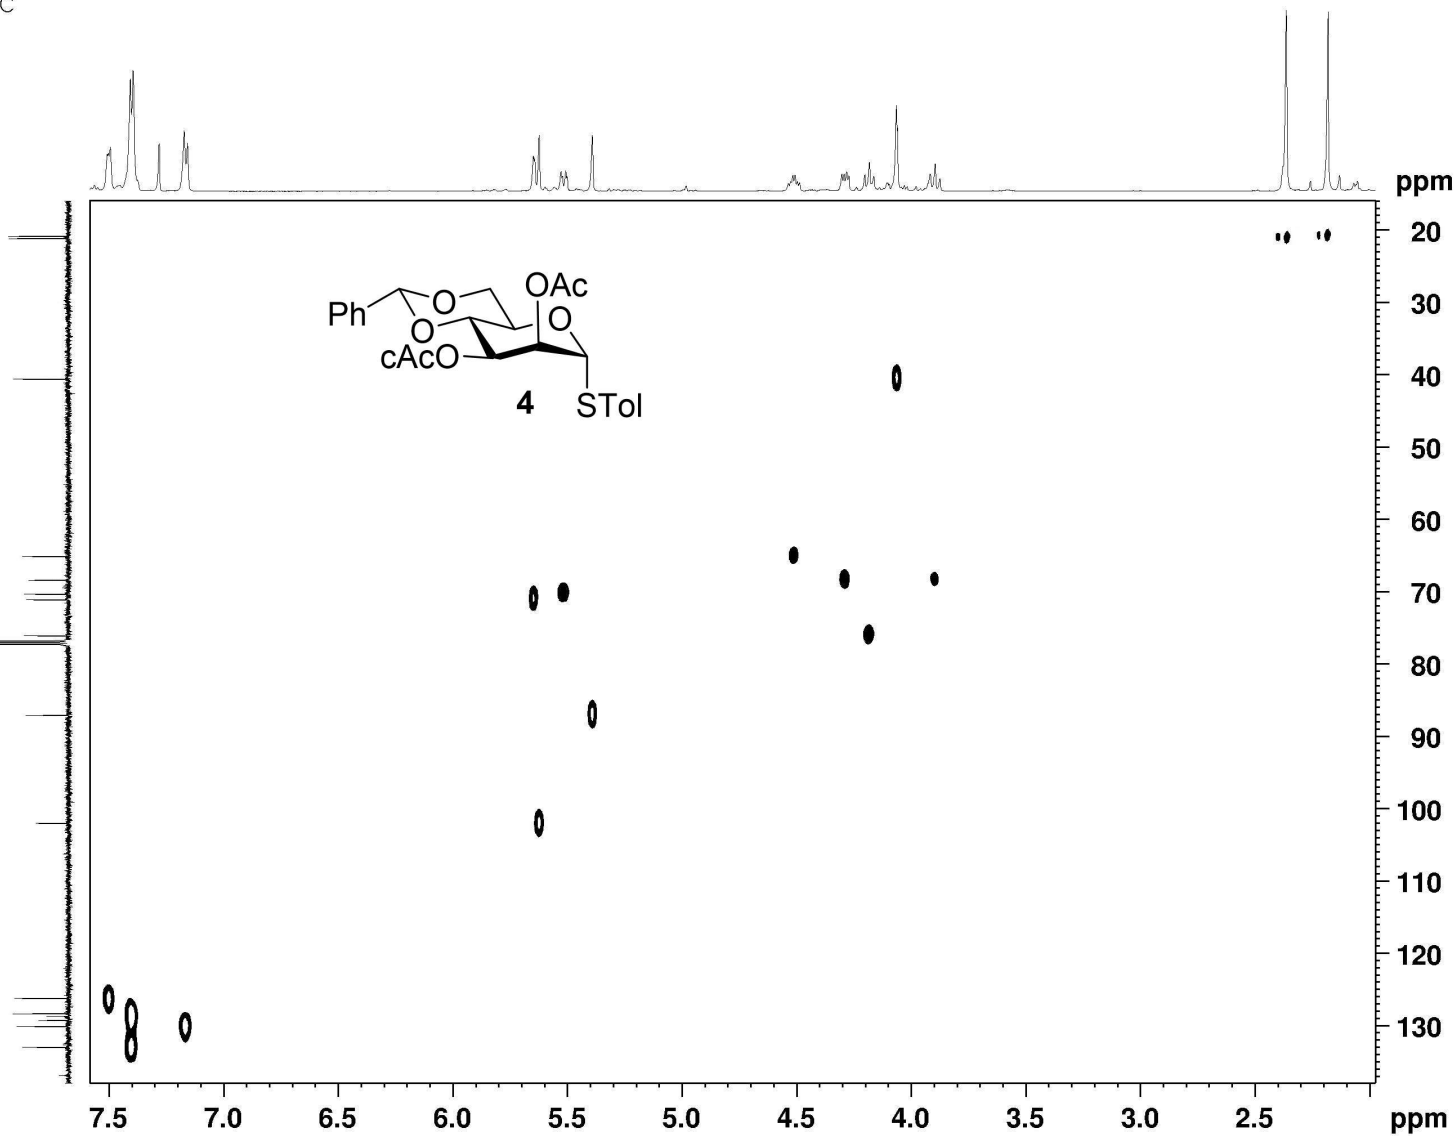

```

Current Data Parameters
NAME      BM-BED-SD07
EXPNO    453
PROCNO   1

F2 - Acquisition Parameters
Date_    20220329
Time     19.31
INSTRUM  Bruker_default_av500
PROBHD   5 mm PABBO BB/
PULPROG  hsgcqtpp12
TD       1024
SOLVENT  cdcl3
NS       2
DS       16
SWH      5000.0000 Hz
FIDRES   4.882812 Hz
AQ       0.1024000 sec
RG       25.6
DN       100.000 usec
DE       6.50 usec
TE       1547.4 K
CONST2   145.000000
D0       1.0000000 sec
D1       1.5000000 sec
D4       0.00172414 sec
D11      0.0300000 sec
D16      0.0002000 sec
D24      0.0008000 sec
IND      0.0000190 sec

===== CHANNEL F1 =====
SFO1    500.452023 MHz
NUC1     1H
P1      14.25 usec
P2      28.50 usec
P3      0 usec
PL1     18.0000000 W

===== CHANNEL F2 =====
SFO2    125.858368 MHz
NUC2     13C
CPOPRG[2]  gmgp
P3      10.70 usec
P4      21.40 usec
PCPD2   70.00 usec
PLM2    75.0000000 W
PLM12   1.7520004 W

===== GRADIENT CHANNEL =====
GRNAM[1]  SMO10.100
GRNAM[2]  SMO10.100
GRNAM[3]  SMO10.100
GRNAM[4]  SMO10.100
GPE1     80.00 %
GPE2     20.10 %
GPE3     11.00 %
GPE4     -5.00 %
P16      1000.00 usec
P19      600.00 usec

F1 - Acquisition parameters
SI       74
SFO1     125.858368 MHz
FIDRES   679.071045 Hz
SN        139.646 ppm
FMODX    Echo-Antiecho

F2 - Processing parameters
SI       1024
SF       500.4500000 MHz
WDW      QSINE
SSB      2
LB       0 Hz
GB       0
PC       1.00

F1 - Processing parameters
SI       1024
WDW      echo-antiecho
SF       125.8382530 MHz
WDW      QSINE
SSB      2
LB       0 Hz
GB       0
  
```

GROUP BM  
 BM-SBD-SD44 in CDCl3

7.5735  
 7.4411  
 7.4381  
 7.4341  
 7.4293  
 7.3784  
 7.3638  
 7.3594  
 7.3565  
 7.3500  
 7.3477  
 7.3438  
 7.3384  
 7.3301  
 7.3125  
 7.2842  
 7.1603  
 7.1476  
 7.1447  
 — 5.6322  
 5.4899  
 5.4867  
 5.4831  
 5.4800  
 5.3036  
 5.2867  
 5.2787  
 5.1489  
 5.1461  
 5.0169  
 4.3840  
 4.3670  
 4.3629  
 3.9764  
 3.9705  
 3.8794  
 3.8608  
 3.8544  
 3.8428  
 3.8343  
 3.8248  
 3.6615  
 3.6519  
 3.4366  
 3.3377  
 3.3269  
 3.3226  
 3.3121  
 3.3033  
 2.0389

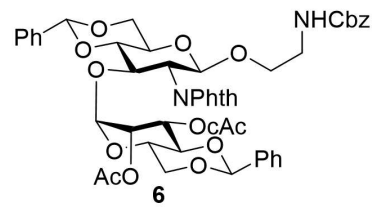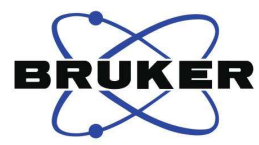

Current Data Parameters  
 NAME BM-SBD-SD44  
 EXPNO 920  
 PROCNO 1

F2 - Acquisition Parameters  
 Date\_ 20230601  
 Time 4.57 h  
 INSTRUM AV4 500MHz  
 PROBHD Z119467\_0011 ( )  
 PULPROG zg30  
 TD 65536  
 SOLVENT CDCl3  
 NS 16  
 DS 2  
 SWH 10000.000 Hz  
 FIDRES 0.305176 Hz  
 AQ 3.2767999 sec  
 RG 101  
 DW 50.000 usec  
 DE 10.11 usec  
 TE 297.7 K  
 D1 1.00000000 sec  
 TD0 1  
 SFO1 500.1430884 MHz  
 NUC1 1H  
 P0 4.67 usec  
 P1 14.00 usec  
 PLW1 13.47399998 W

F2 - Processing parameters  
 SI 65536  
 SF 500.1400000 MHz  
 WDW EM  
 SSB 0  
 LB 0.30 Hz  
 GB 0  
 PC 1.00

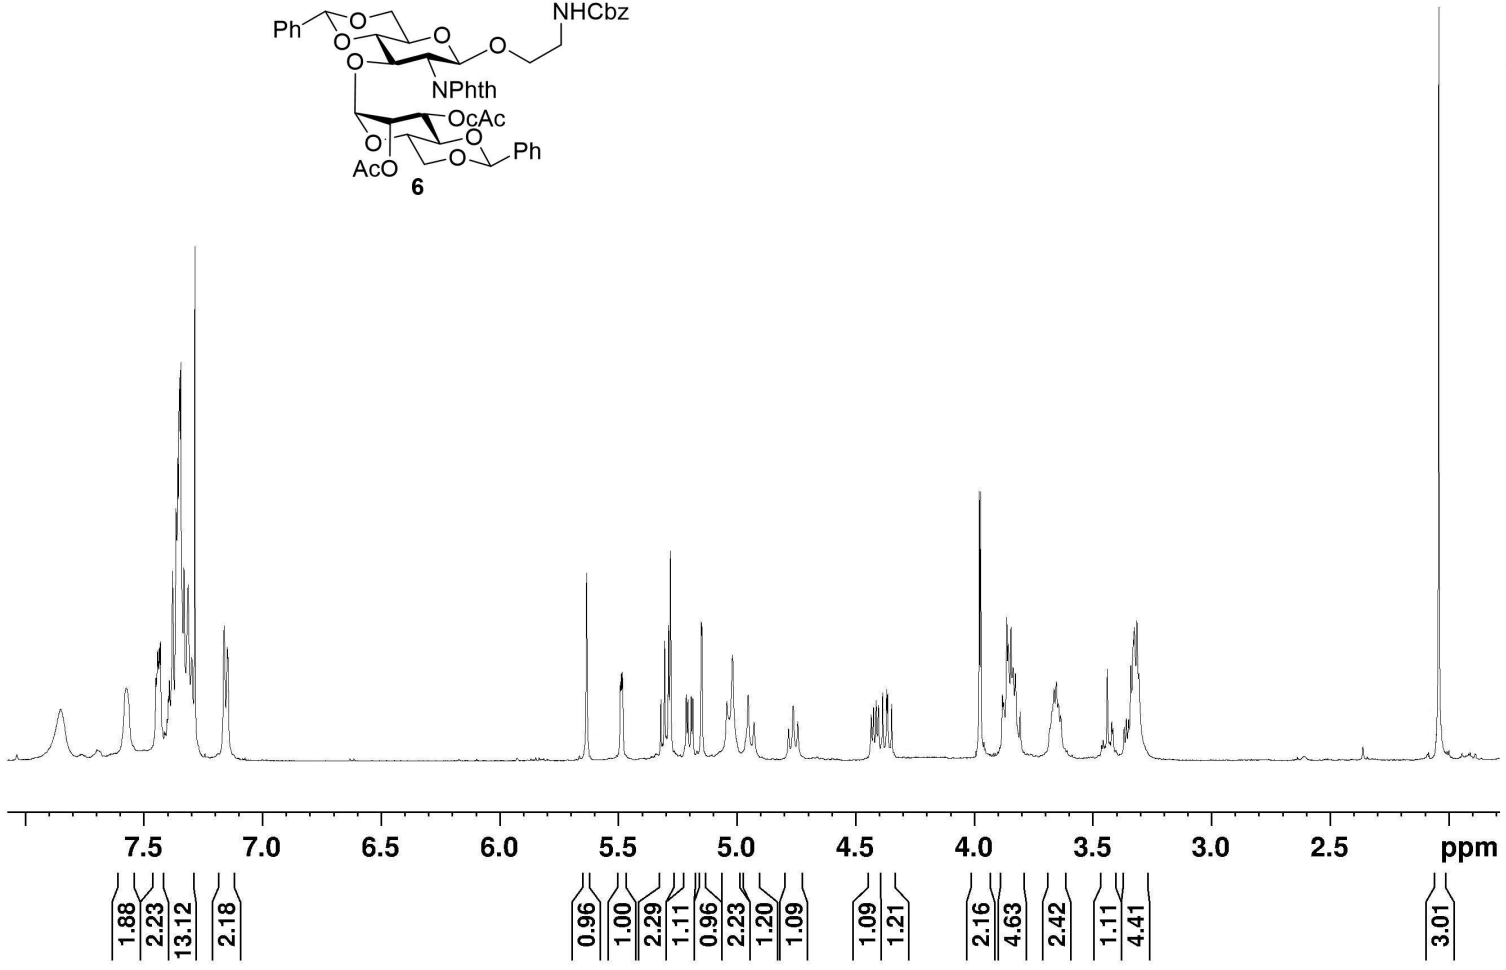



GROUP BM  
 BM-SBD-SD44 in CDCl3

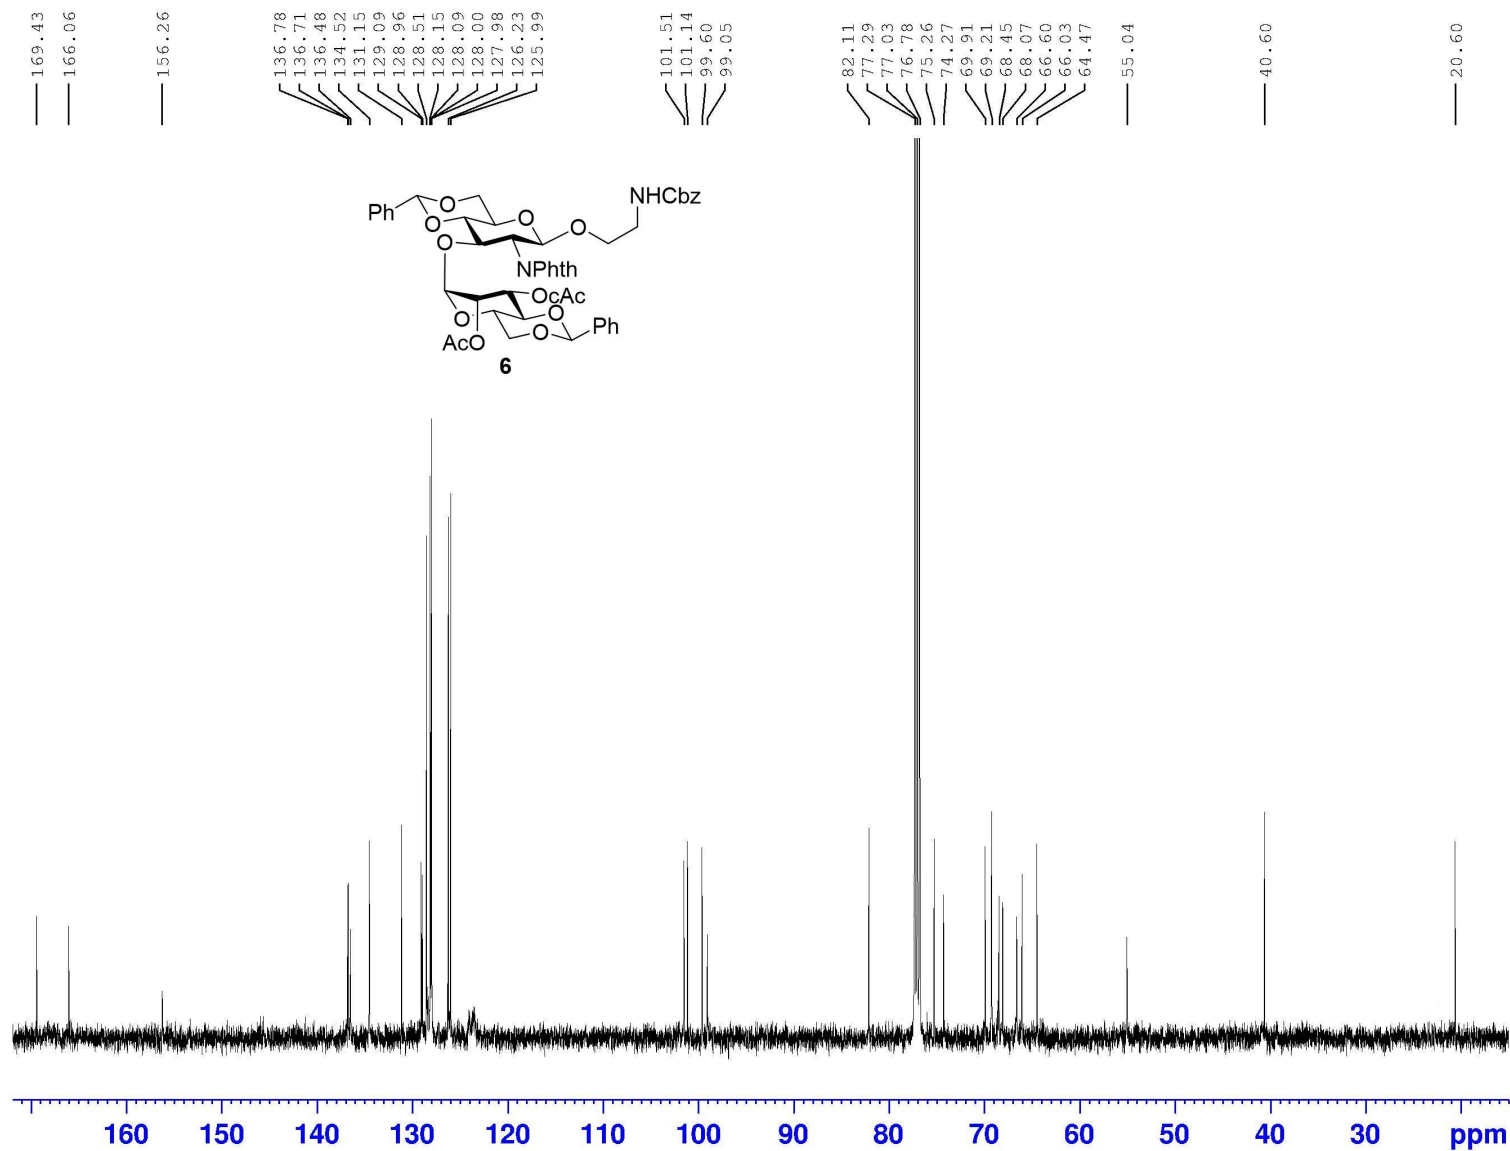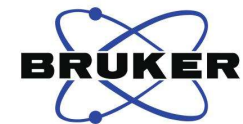

Current Data Parameters  
 NAME BM-SBD-SD44  
 EXPNO 323  
 PROCNO 1

F2 - Acquisition Parameters  
 Date\_ 20230601  
 Time 7.06 h  
 INSTRUM AV4 500MHz  
 PROBHD Z119467\_0011 ( )  
 PULPROG zgpg30  
 TD 65536  
 SOLVENT CDCl3  
 NS 1024  
 DS 4  
 SWH 30120.482 Hz  
 FIDRES 0.919204 Hz  
 AQ 1.0878977 sec  
 RG 101  
 DW 16.600 usec  
 DE 6.50 usec  
 TE 298.7 K  
 D1 2.00000000 sec  
 D11 0.03000000 sec  
 TD0 1  
 SFO1 125.7728791 MHz  
 NUC1 13C  
 P0 3.33 usec  
 P1 10.00 usec  
 PLW1 77.33000183 W  
 SFO2 500.1420006 MHz  
 NUC2 1H  
 CPDPRG2 waltz65  
 PCPD2 80.00 usec  
 PLW2 13.47399998 W  
 PLW12 0.41264001 W  
 PLW13 0.20756000 W

F2 - Processing parameters  
 SI 32768  
 SF 125.7603030 MHz  
 WDW EM  
 SSB 0  
 LB 1.00 Hz  
 GB 0  
 PC 1.40

GROUP BM  
BM-SBD-SD44 in CDCl3

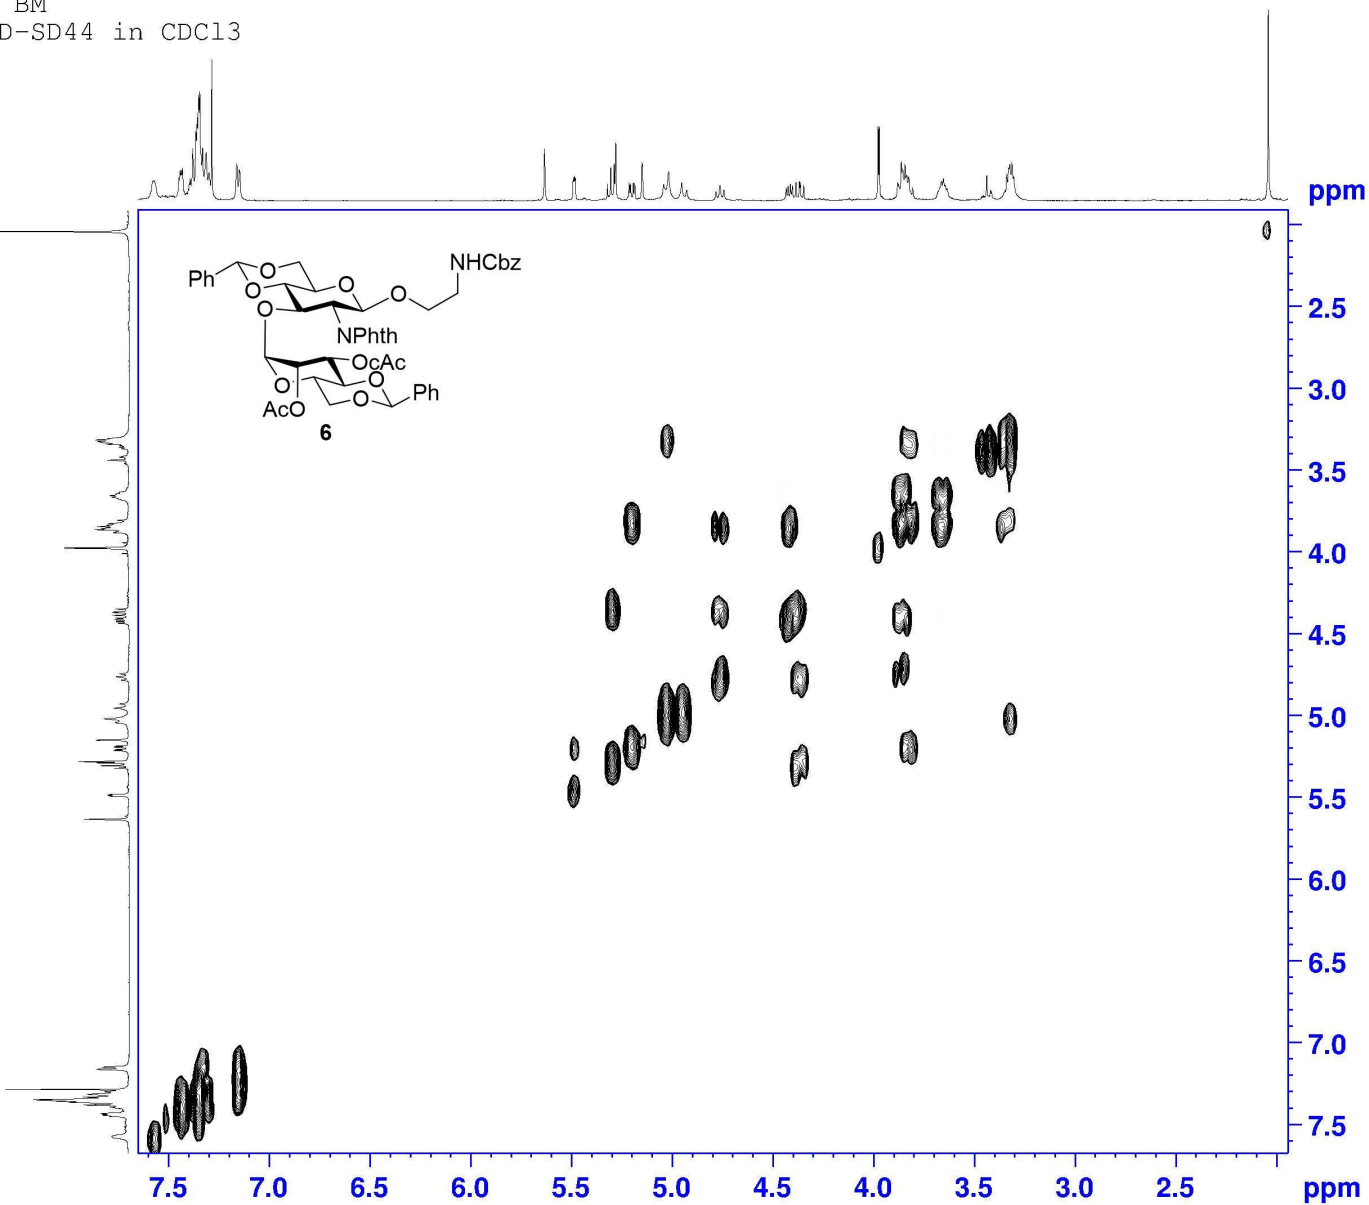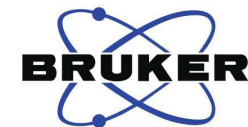

```
Current Data Parameters
NAME      BM-SBD-SD44
EXPNO     921
PROCNO    1

F2 - Acquisition Parameters
Date_     20230601
Time      5.16 h
INSTRUM   AV4 500MHz
PROBHD    zll9467_0011 (
PULPROG   cosygpmfqr
TD         2048
SOLVENT   CDCl3
NS         4
DS         16
SWH        10000.000 Hz
FIDRES     9.765625 Hz
AQ         0.1024000 sec
RG         64
DW         50.000 usec
DE         6.50 usec
TE         297.7 K
D0         0.0000000 sec
D1         2.00000000 sec
D13        0.00000400 sec
D16        0.00020000 sec
TNO        0.00009997 sec
TDAV       1
SFO1       500.1425007 MHz
NUC1       1H
P1         14.00 usec
PLW1       13.47399998 W
GPNAM[1]   SMSQ10.100
GPZ1       16.00 %
GPNAM[2]   SMSQ10.100
GPZ2       12.00 %
GPNAM[3]   SMSQ10.100
GPZ3       40.00 %
P16        1000.00 usec

F1 - Acquisition parameters
TD         128
SFO1       500.1425 MHz
FIDRES     156.289078 Hz
SW         19.999 ppm
FMODE      QF

F2 - Processing parameters
SI         1024
SF         500.1400000 MHz
WDW        SINE
SSB        0
LB         0 Hz
GB         0
PC         1.40

F1 - Processing parameters
SI         1024
MC2        QF
SF         500.1400000 MHz
WDW        SINE
SSB        0
LB         0 Hz
GB         0
```

GROUP BM  
BM-SBD-SD44 in CDCl3

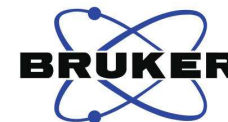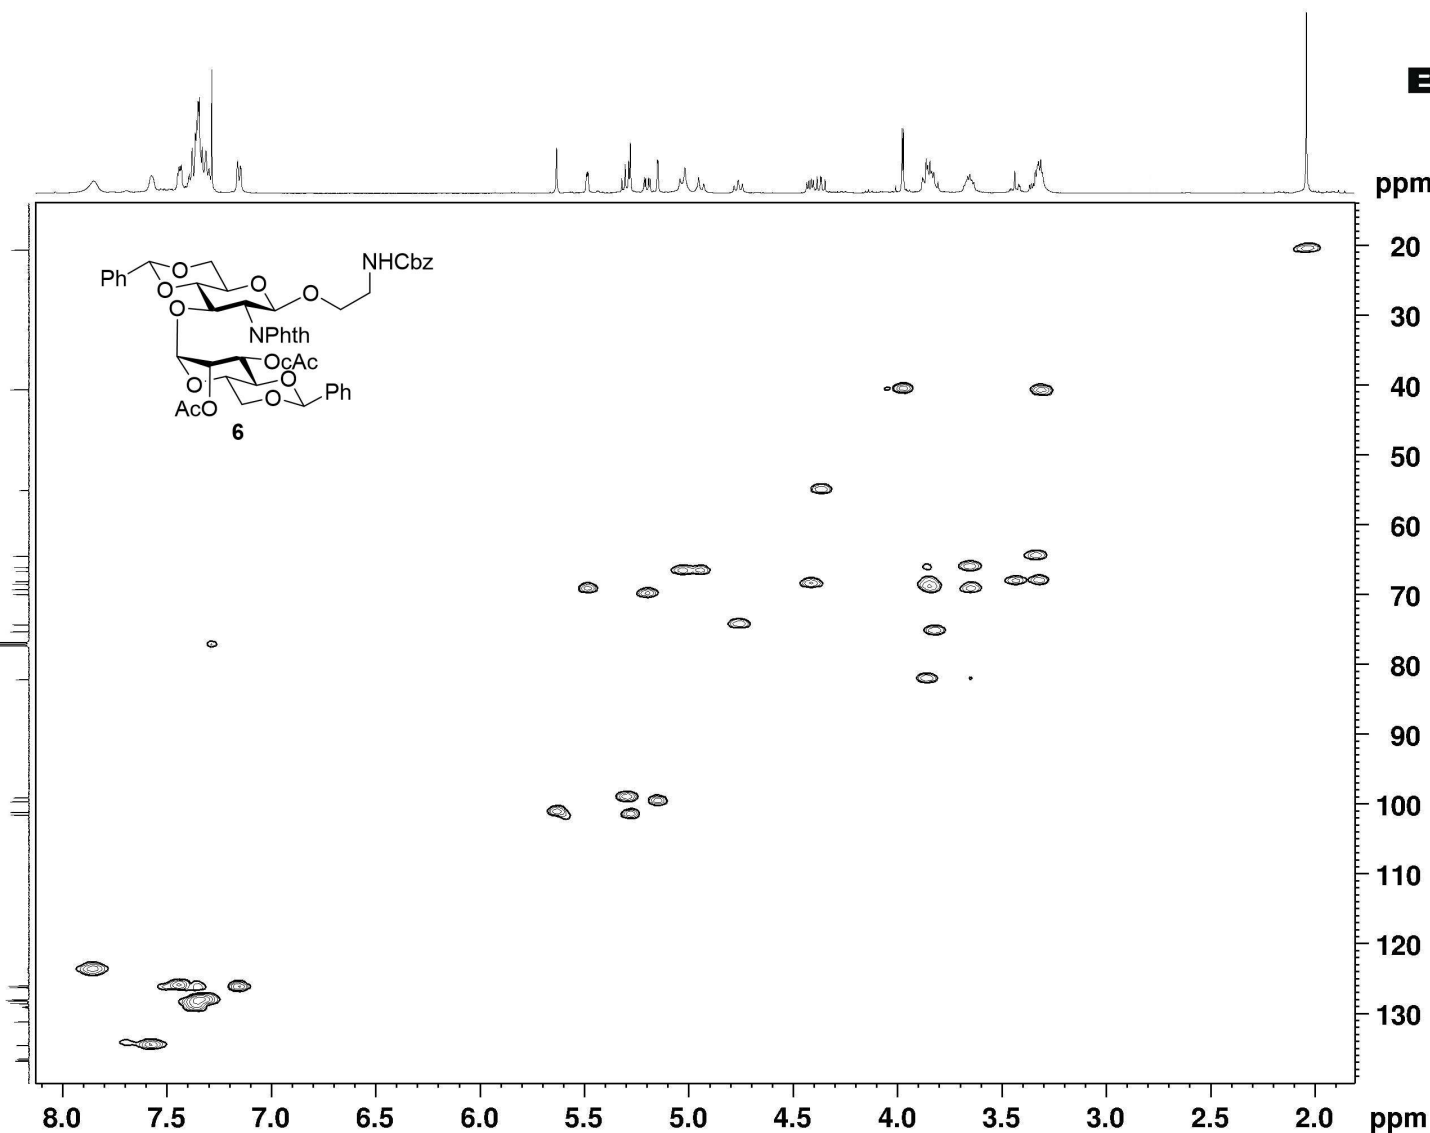

Current Data Parameters  
NAME BM-SBD-SD44  
EXPNO 922  
PROCNO 1

F2 - Acquisition Parameters  
Date\_ 20230601  
Time 6.11 h  
INSTRUM AV4 500MHz  
PROBHD 2119467.001 (   
PULPROG hsgcstgpsi2  
TD 1024  
SOLVENT CDCl3  
NS 8  
DS 16  
SWH 10000.000 Hz  
FIDRES 19.531250 Hz  
AQ 0.0512000 sec  
RG 101  
DW 50.000 usec  
DE 6.50 usec  
TE 297.8 K  
CNS12 145.0000000  
DO 0.00000300 sec  
D1 1.50000000 sec  
D4 0.0017544 sec  
D11 0.03000000 sec  
D16 0.00020000 sec  
D24 0.00085207 sec  
IN0 0.00001807 sec  
TDev 1  
ZSQC7NS  
SF01 500.1425007 MHz  
NUC1 1H  
F1 14.00 usec  
P2 28.00 usec  
F28 0 usec  
FLM1 13.47399998 W  
SF02 125.7728790 MHz  
NUC2 13C  
CPDPRG2 gactp  
P3 15.00 usec  
P4 20.00 usec  
PCPD2 70.00 usec  
FIM2 77.33000183 W  
FLM12 1.57819998 W  
GPNAM[1] SMSQ10.100  
GPZ1 80.00 %  
GPNAM[2] SMSQ10.100  
GPZ2 20.10 %  
GPNAM[3] SMSQ10.100  
GPZ3 11.00 %  
GPNAM[4] SMSQ10.100  
GPZ4 -5.00 %  
P15 1000.00 usec  
P19 600.00 usec

F1 - Acquisition parameters  
TD 256  
SF01 125.7729 MHz  
FIDRES 216.198271 Hz  
SW 220.016 ppm  
FnMODE Echo-Antiecho

F2 - Processing parameters  
SI 1024  
SF 500.1400000 MHz  
WDW QSIINE  
SSB 2  
LB 0 Hz  
GB 0  
PC 1.40

F1 - Processing parameters  
SI 1024  
MC2 echo-antiecho  
SF 125.7600000 MHz  
WDW QSIINE  
SSB 2  
LB 0 Hz  
GB 0

GROUP BM  
 BM-SBD-SD45 in CDCl3

7.8532  
 7.5696  
 7.4847  
 7.4764  
 7.4735  
 7.3721  
 7.3603  
 7.3371  
 7.3289  
 7.3132  
 7.3055  
 7.1121  
 7.0978  
 5.5992  
 5.3375  
 5.3324  
 5.3106  
 5.2937  
 5.2681  
 5.2359  
 5.1198  
 5.0260  
 5.0002  
 4.9407  
 4.7930  
 4.4066  
 4.3952  
 4.3856  
 4.3439  
 4.3265  
 4.3234  
 4.3058  
 3.8396  
 3.8200  
 3.8115  
 3.8003  
 3.7931  
 3.6903  
 3.6711  
 3.6514  
 3.6412  
 3.6307  
 3.4746  
 3.4628  
 3.4408  
 3.2782  
 3.1680  
 2.0607

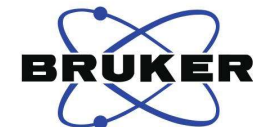

Current Data Parameters  
 NAME BM-SBD-SD45  
 EXPNO 870  
 PROCNO 1

F2 - Acquisition Parameters  
 Date\_ 20230805  
 Time 23.17 h  
 INSTRUM AV4 500MHz  
 PROBHD 2119467\_0011 ( zq30  
 PULPROG zg30  
 TD 65536  
 SOLVENT CDCl3  
 NS 64  
 DS 2  
 SWH 12500.000 Hz  
 FIDRES 0.381470 Hz  
 AQ 2.6214399 sec  
 RG 43.3333  
 DW 40.000 usec  
 DE 7.61 usec  
 TE 298.7 K  
 D1 1.00000000 sec  
 TD0 1  
 SFO1 500.1430008 MHz  
 NUC1 1H  
 P0 4.67 usec  
 F1 14.00 usec  
 PLW1 13.47399998 W

F2 - Processing parameters  
 SI 65536  
 SF 500.1400000 MHz  
 WDW EM  
 SSB 0  
 LB 0.30 Hz  
 GB 0  
 PC 1.00

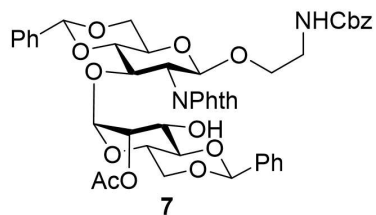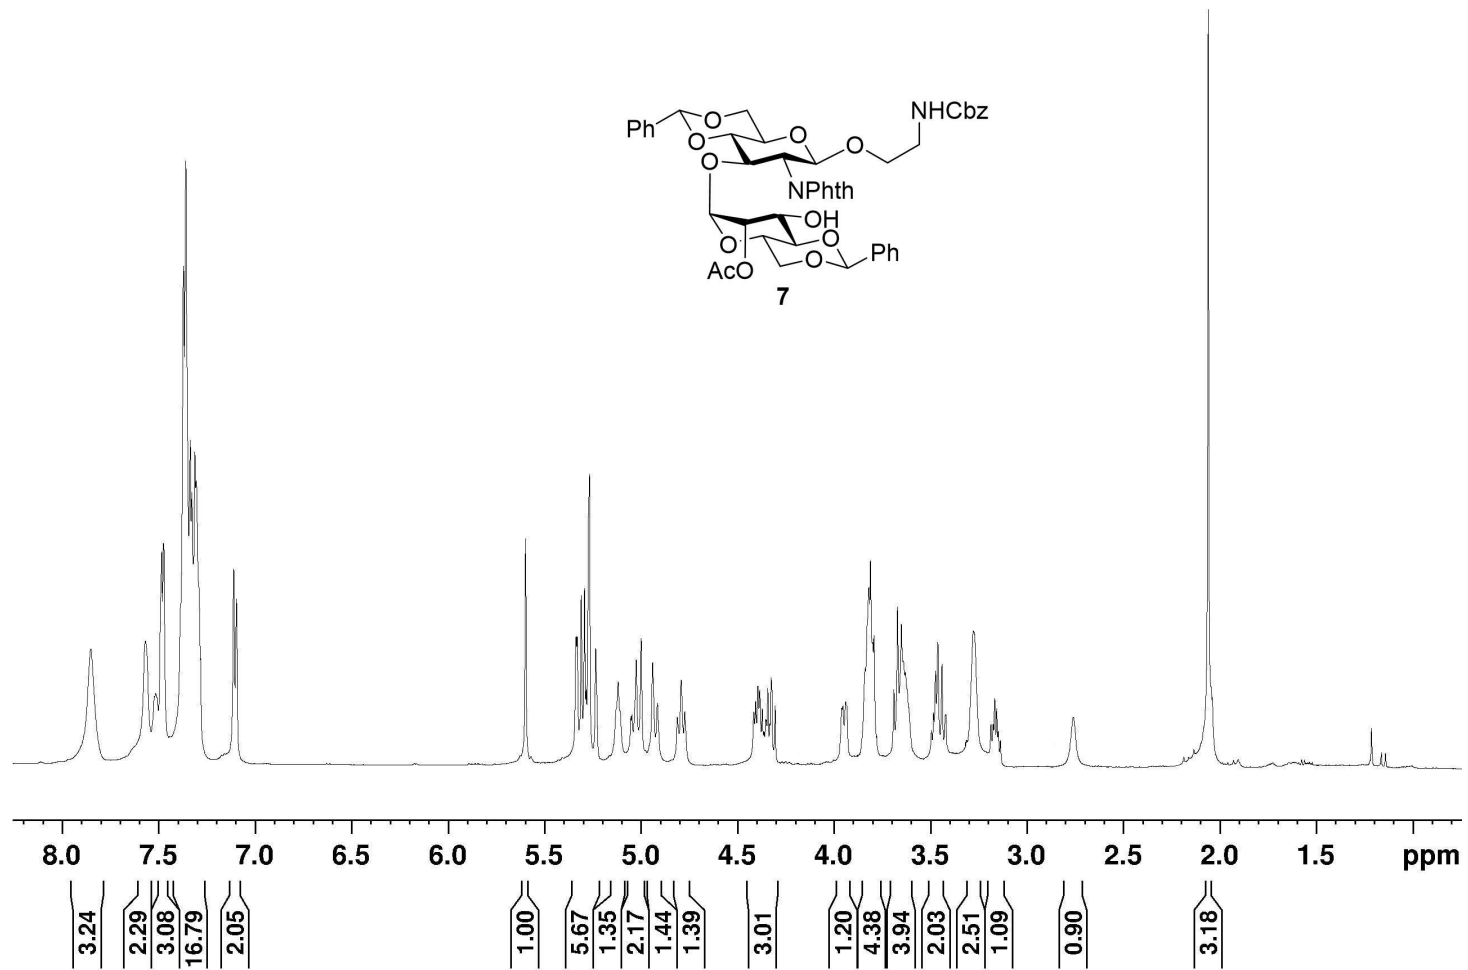

GROUP BM  
BM-SBD-SD45 in CDCl3

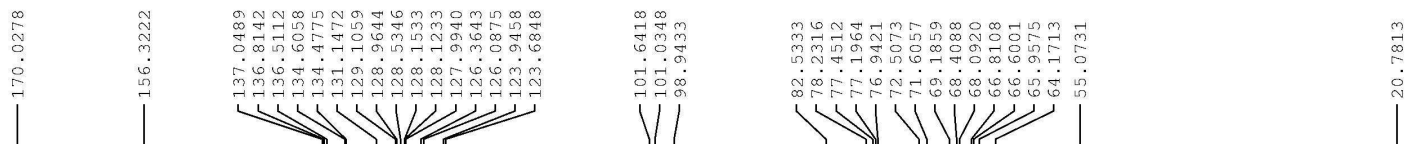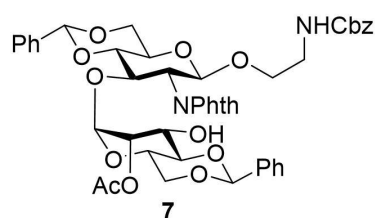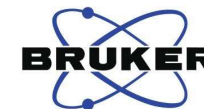

Current Data Parameters  
 NAME BM-SBD-SD45  
 EXPNO 873  
 PROCNO 1

F2 - Acquisition Parameters  
 Date\_ 20230806  
 Time 3.29 h  
 INSTRUM AV4 500MHz  
 PROBHD z119467\_0011 (4  
 PULPROG zgpg30  
 TD 65536  
 SOLVENT CDCl3  
 NS 2048  
 DS 4  
 SWH 31250.000 Hz  
 FIDRES 0.953674 Hz  
 AQ 1.0485760 sec  
 RG 101  
 DW 16.000 usec  
 DE 6.50 usec  
 TE 299.8 K  
 D1 2.0000000 sec  
 D11 0.0300000 sec  
 TD0 1  
 SFO1 125.7728791 MHz  
 NUC1 13C  
 P0 3.33 usec  
 P1 10.00 usec  
 PLW1 77.33000183 W  
 SFO2 500.1420006 MHz  
 NUC2 1H  
 CPDPRG2 waltz65  
 PCPD2 80.00 usec  
 PLW2 13.47399998 W  
 PLW12 0.41264001 W  
 PLW13 0.20756000 W

F2 - Processing parameters  
 SI 32768  
 SF 125.7603030 MHz  
 WDW EM  
 SSB 0  
 LB 1.00 Hz  
 GB 0  
 PC 1.40

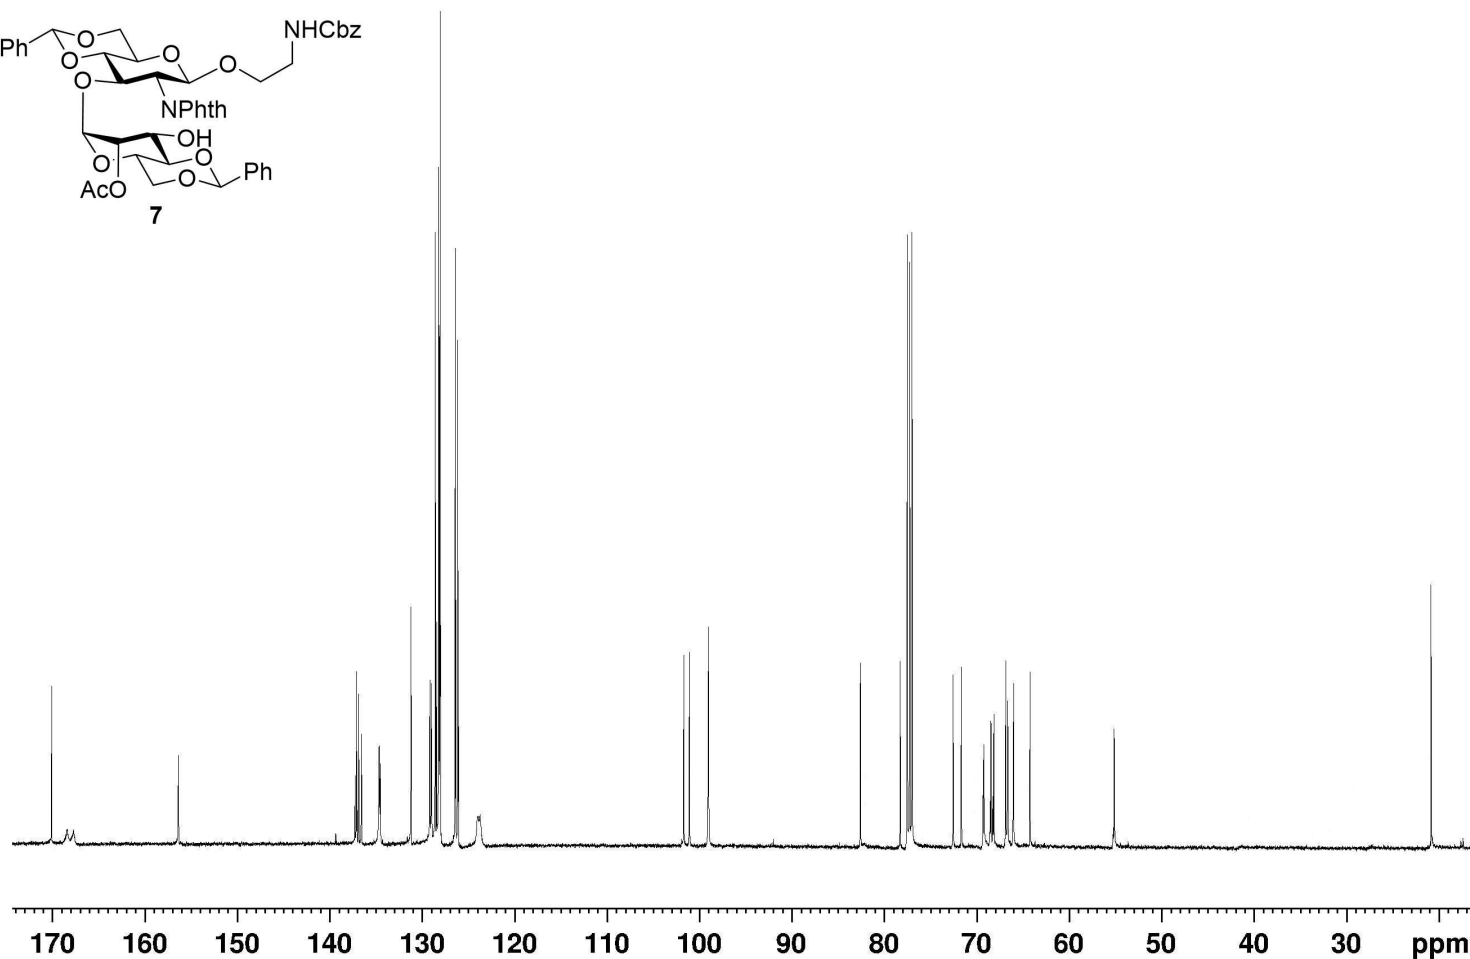

GROUP BM  
BM-SBD-SD45 in CDCl3

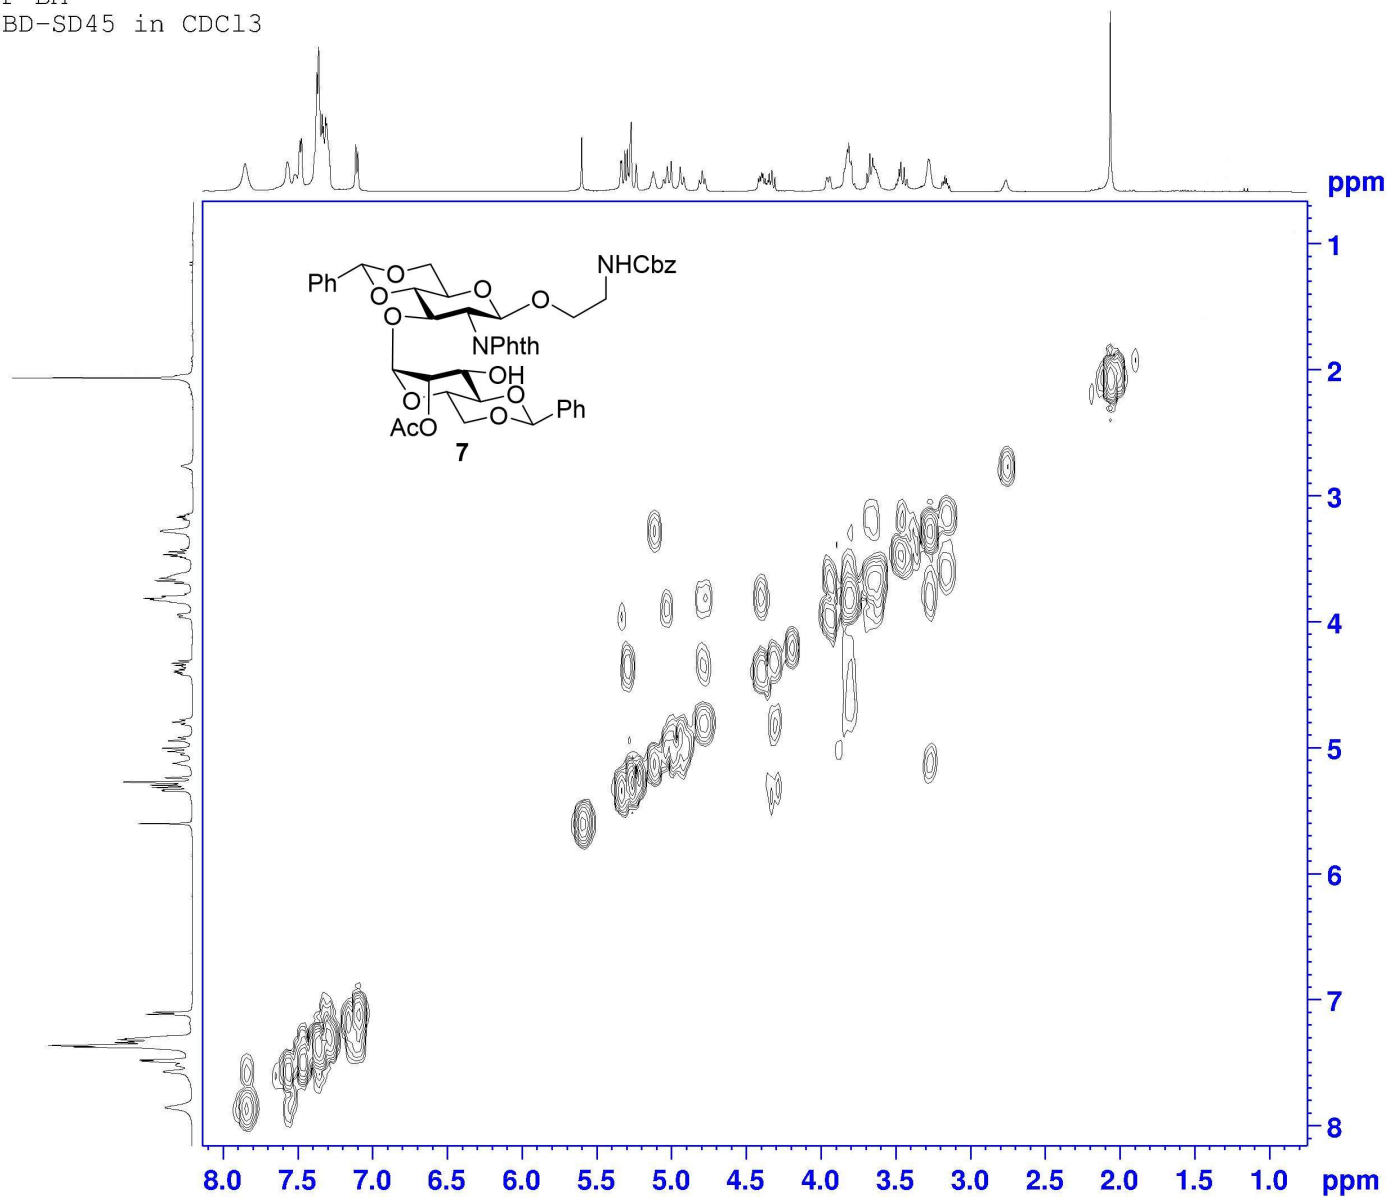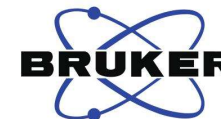

Current Data Parameters  
NAME BM-SBD-SD45  
EXPNO 871  
PROCNO 1

F2 - Acquisition Parameters  
Date\_ 20230805  
Time 23.54 h  
INSTRUM AV4 500MHz  
PROBHD z119467\_0011 f  
PULPROG cosygpppgf  
TD 2048  
SOLVENT CDCl3  
NS 8  
DS 16  
SWH 12500.000 Hz  
FIDRES 12.207031 Hz  
AQ 0.0819200 sec  
RG 64  
DM 40.000 usec  
DE 6.50 usec  
TE 298.7 K  
D0 0.00000300 sec  
D1 2.00000000 sec  
D11 0.03000000 sec  
D12 0.00002000 sec  
D13 0.00000400 sec  
D16 0.00020000 sec  
TNO 0.00007997 sec  
Tдав 1  
SFO1 500.1430008 MHz  
NUC1 1H  
P0 14.00 usec  
P1 14.00 usec  
P17 2500.00 usec  
PLW1 13.47399998 W  
PLW10 2.93440008 W  
GPRAM[1] SMSQ10.100  
GP21 10.00 %  
P16 1000.00 usec

F1 - Acquisition parameters  
TD 128  
SFO1 500.143 MHz  
FIDRES 195.373550 Hz  
SW 25.001 ppm  
FhMODE QF

F2 - Processing parameters  
SI 1024  
SF 500.1400000 MHz  
WDW QSINE  
SSB 0  
LB 0 Hz  
GB 0  
FC 1.40

F1 - Processing parameters  
SI 1024  
MC2 QF  
SF 500.1400000 MHz  
WDW QSINE  
SSB 0  
LB 0 Hz  
GB 0

GROUP BM  
BM-SBD-SD45 in CDCl3

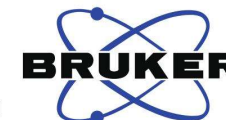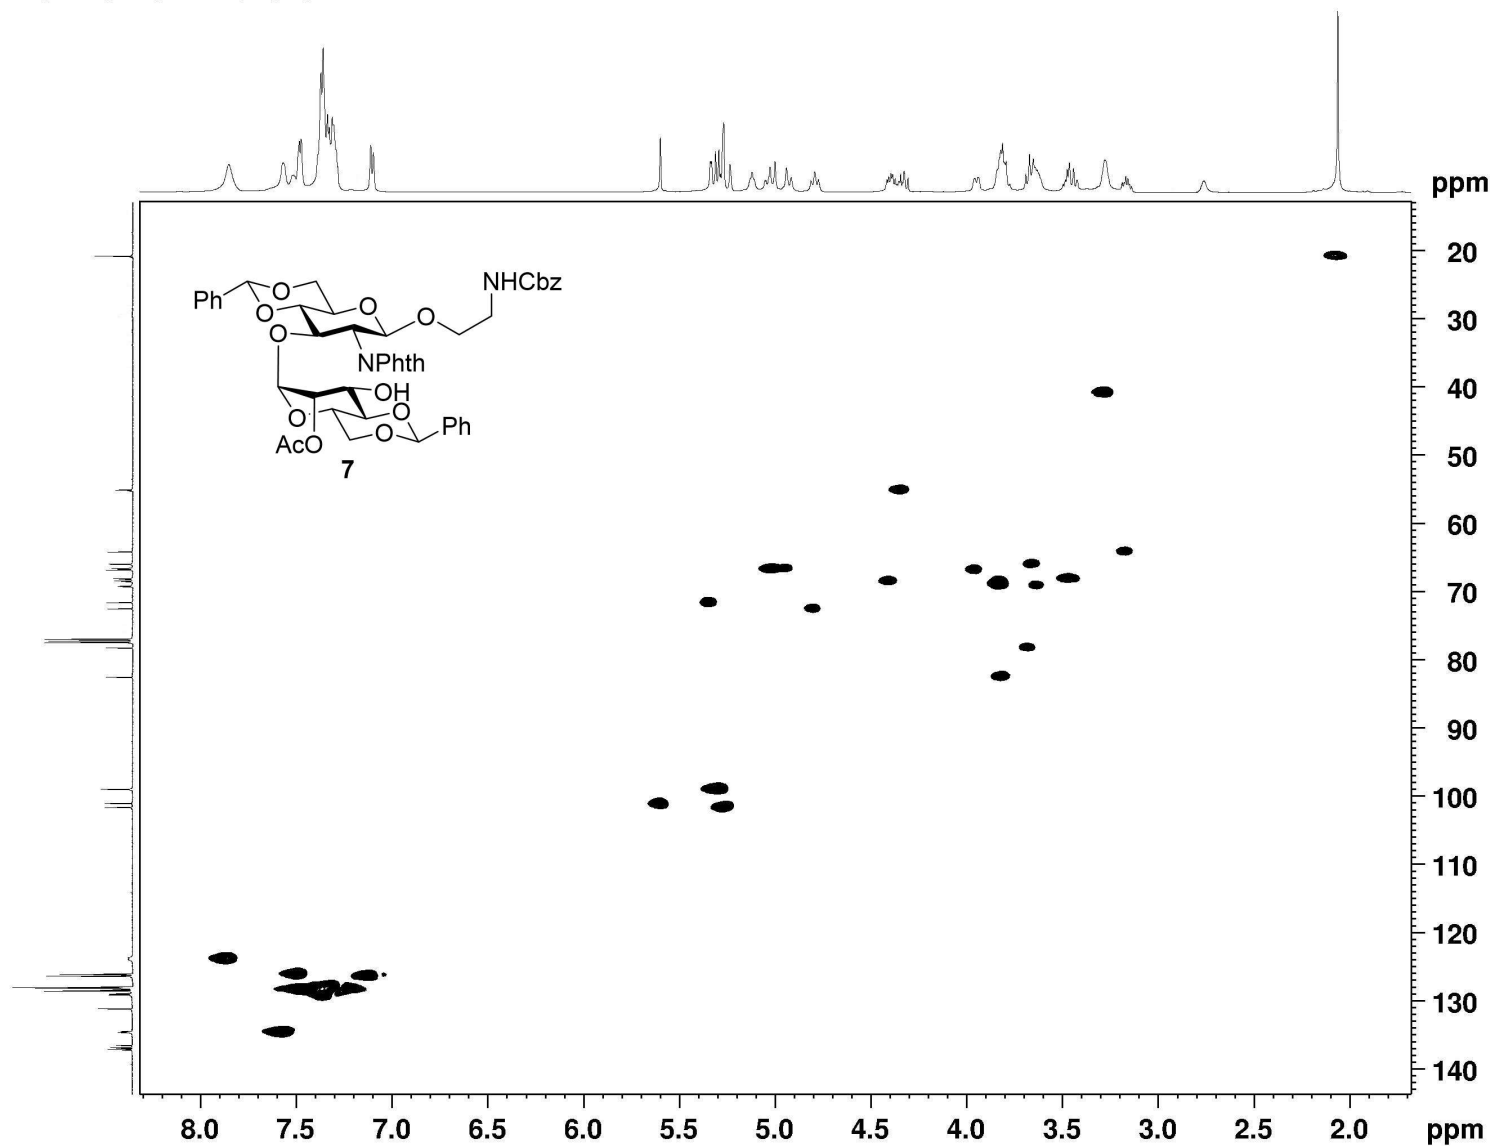

```
Current Data Parameters
NAME      BM-SBD-SD45
EXPNO    872
PROCNO   1

F2 - Acquisition Parameters
Date_    20230806
Time     1.42 h
INSTRUM  AV4 500MHz
PROBHD   zll19467_0011 (
PULPROG  hsqcetgps12
TD       1024
SOLVENT  CDCl3
NS       16
DS       16
SWH      12500.000 Hz
FIDRES   24.434062 Hz
AQ       0.0409600 sec
RG       101
DW       40.000 usec
DE       6.50 usec
TE       298.8 K
CNR2     145.0000000
D0       0.00000300 sec
D1       1.50000000 sec
D4       0.00272414 sec
D11      0.03000000 sec
D16      0.00020000 sec
D24      0.00086207 sec
IN0      0.00001590 sec
Tdav     1
360PFTMS
SF01     500.1430008 MHz
NUC1     1H
P1       14.00 usec
P2       28.00 usec
P28      0 usec
PLW1     13.47399998 W
SF02     125.7728790 MHz
NUC2     13C
CPDPRG2  garp
P3       10.00 usec
P4       20.00 usec
PCPD2    70.00 usec
PLW2     77.33000183 W
PLW12    1.57619998 W
GPNAM(1) SMSQ10.100
GP21     80.00 %
GPNAM(2) SMSQ10.100
GP22     20.10 %
GPNAM(3) SMSQ10.100
GP23     11.00 %
GPNAM(4) SMSQ10.100
GP24     -5.00 %
P16      1000.00 usec
P19      600.00 usec

F1 - Acquisition parameters
TD       256
SF01     125.7729 MHz
FIDRES   245.676102 Hz
SW       251.026 ppm
F1MODE   Echo-Antiecho

F2 - Processing parameters
SI       1024
SF       500.1400000 MHz
WDW      QSI
SSB      2
LB       0 Hz
GB       0
PC       1.40

F1 - Processing parameters
SI       1024
MC2      echo-antiecho
SF       125.7669050 MHz
WDW      QSI
SSB      2
LB       0 Hz
GB       0
```

GROUP BM  
BM-SBD-SDB12 in CDCl3

7.0325  
7.0147  
6.8726  
6.8547

5.6088

4.6701  
4.6572  
4.5960  
4.5831  
4.3384  
4.3250  
4.3113  
4.2977

3.7967

1.5583  
1.4312  
1.4060  
1.3923

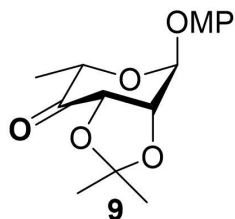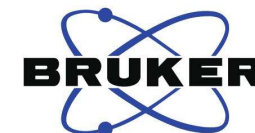

Current Data Parameters  
NAME BM-SBD-SDB12  
EXPNO 180  
PROCNO 1

F2 - Acquisition Parameters  
Date\_ 20220804  
Time 13.23 h  
INSTRUM AV4 500MHz  
PROBHD Z119467\_0011 (zj30  
PULPROG zg30  
TD 40000  
SOLVENT CDCl3  
NS 8  
DS 0  
SWH 10000.000 Hz  
FIDRES 0.500000 Hz  
AQ 2.0000000 sec  
RG 101  
DW 50.000 usec  
DE 10.11 usec  
TE 298.8 K  
D1 1.00000000 sec  
TD0 1  
SFO1 500.1430884 MHz  
NUC1 1H  
P0 4.67 usec  
P1 14.00 usec  
PLW1 13.47399998 W

F2 - Processing parameters  
SI 65536  
SF 500.1400000 MHz  
WDW EM  
SSB 0  
LB 0.30 Hz  
GB 0  
PC 1.00

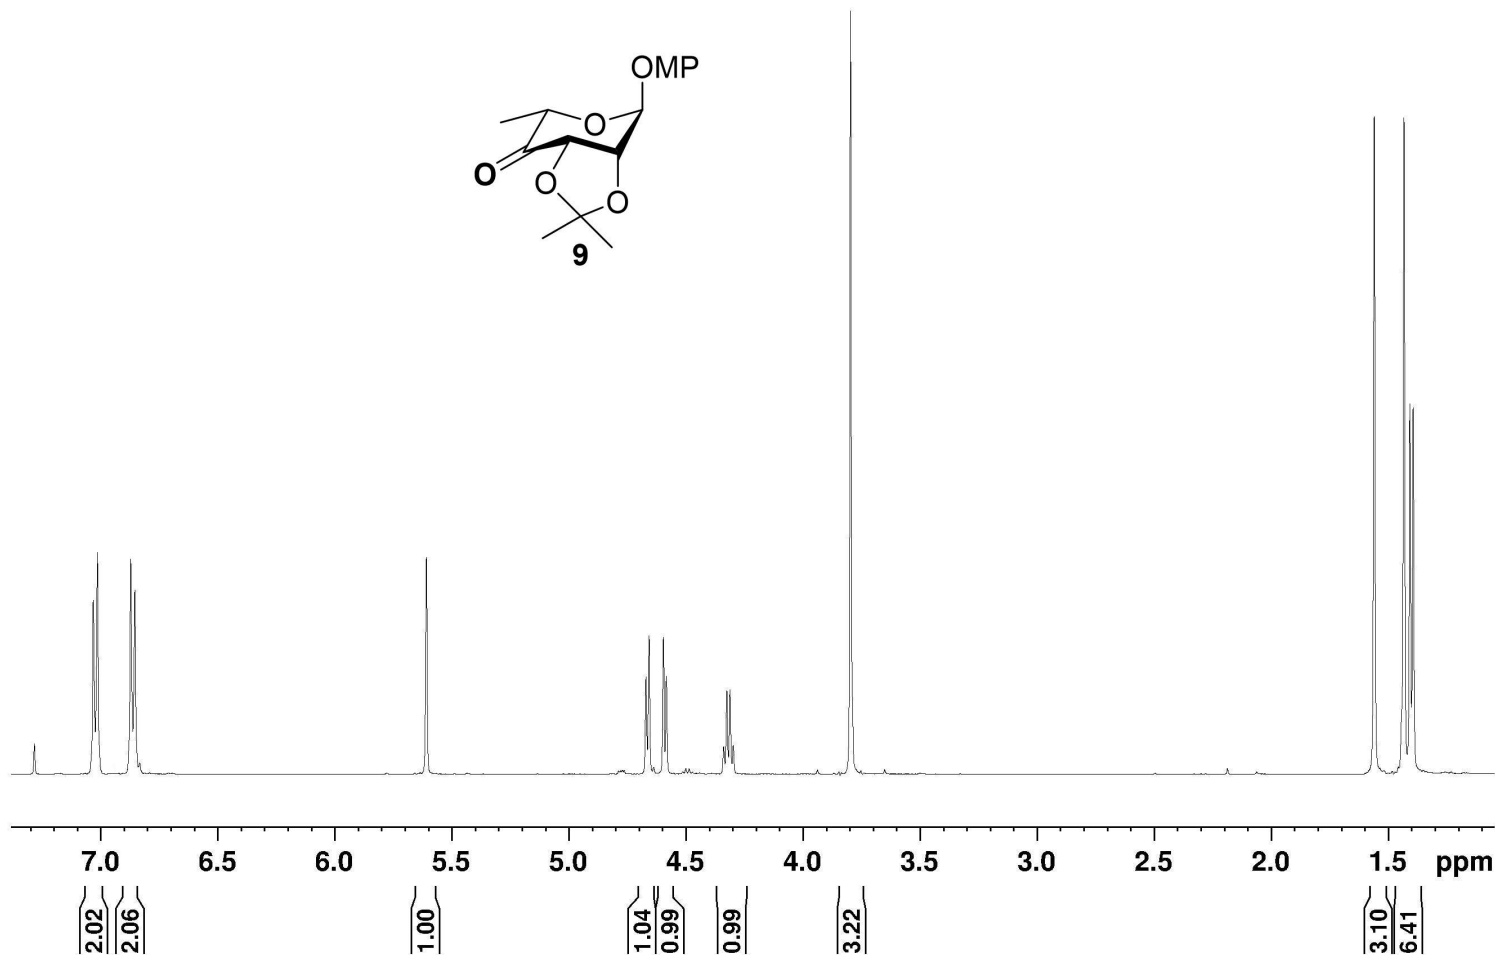



GROUP BM  
 BM-SBD-SDB12 13C in CDCl3

155.26  
 149.78

117.06  
 114.79  
 111.85

95.50

78.61  
 77.29  
 77.04  
 76.79  
 75.97  
 70.79

55.64

26.69  
 25.49

16.36

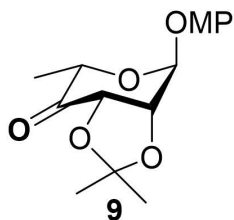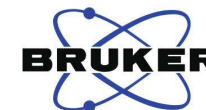

```

Current Data Parameters
NAME      BM-SBD-SDB12
EXPNO     761
PROCNO    1

F2 - Acquisition Parameters
Date_     20220825
Time      20.49
INSTRUM   Bruker_default_av500
PROBHD    5 mm PABBO BB/
PULPROG   zgpg30
TD         65536
SOLVENT   CDCl3
NS         128
DS         4
SWH        25252.525 Hz
FIDRES     0.385323 Hz
AQ         1.2976128 sec
RG         16
DM         19.800 usec
DE         6.50 usec
TE         272.6 K
D1         2.00000000 sec
D11        0.03000000 sec
TD0        1

===== CHANNEL f1 =====
SFO1      125.8508368 MHz
NUC1       13C
P1         10.70 usec
PLW1       75.00000000 W

===== CHANNEL f2 =====
SFO2      500.4520014 MHz
NUC2       1H
CPDPRG2    waltz16
PCPD2      80.00 usec
PLW2       18.00000000 W
PLW12      0.57111001 W
PLW13      0.28727001 W

F2 - Processing parameters
SI         32768
SF         125.8382530 MHz
WDW        EM
SSB        0
LB         1.00 Hz
GB         0
PC         1.35
  
```

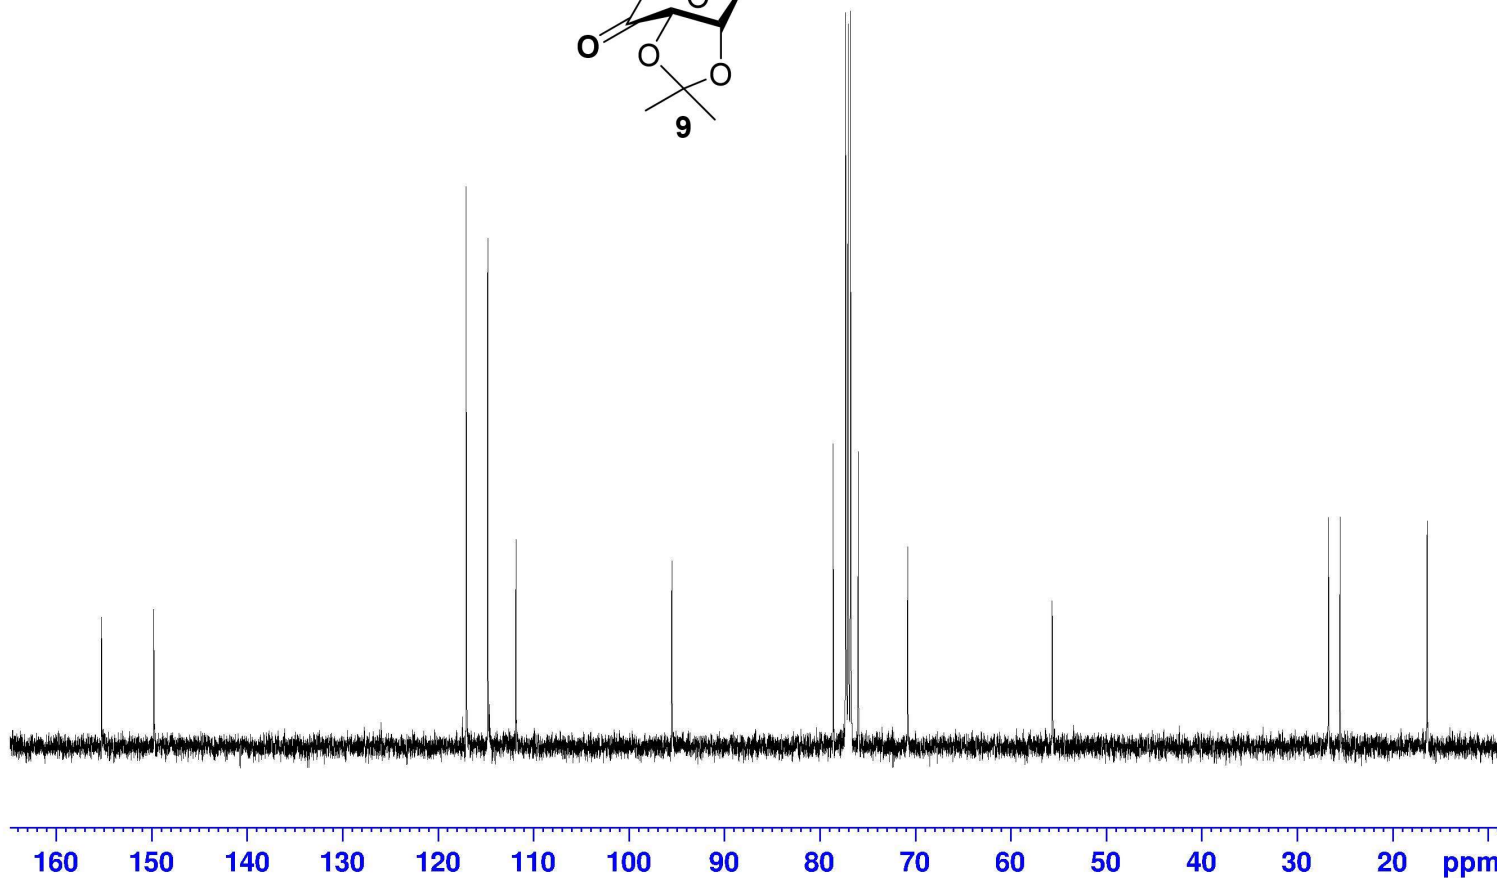

GROUP BM  
BM-SBD-SDB12 in CDCl3  
COSY

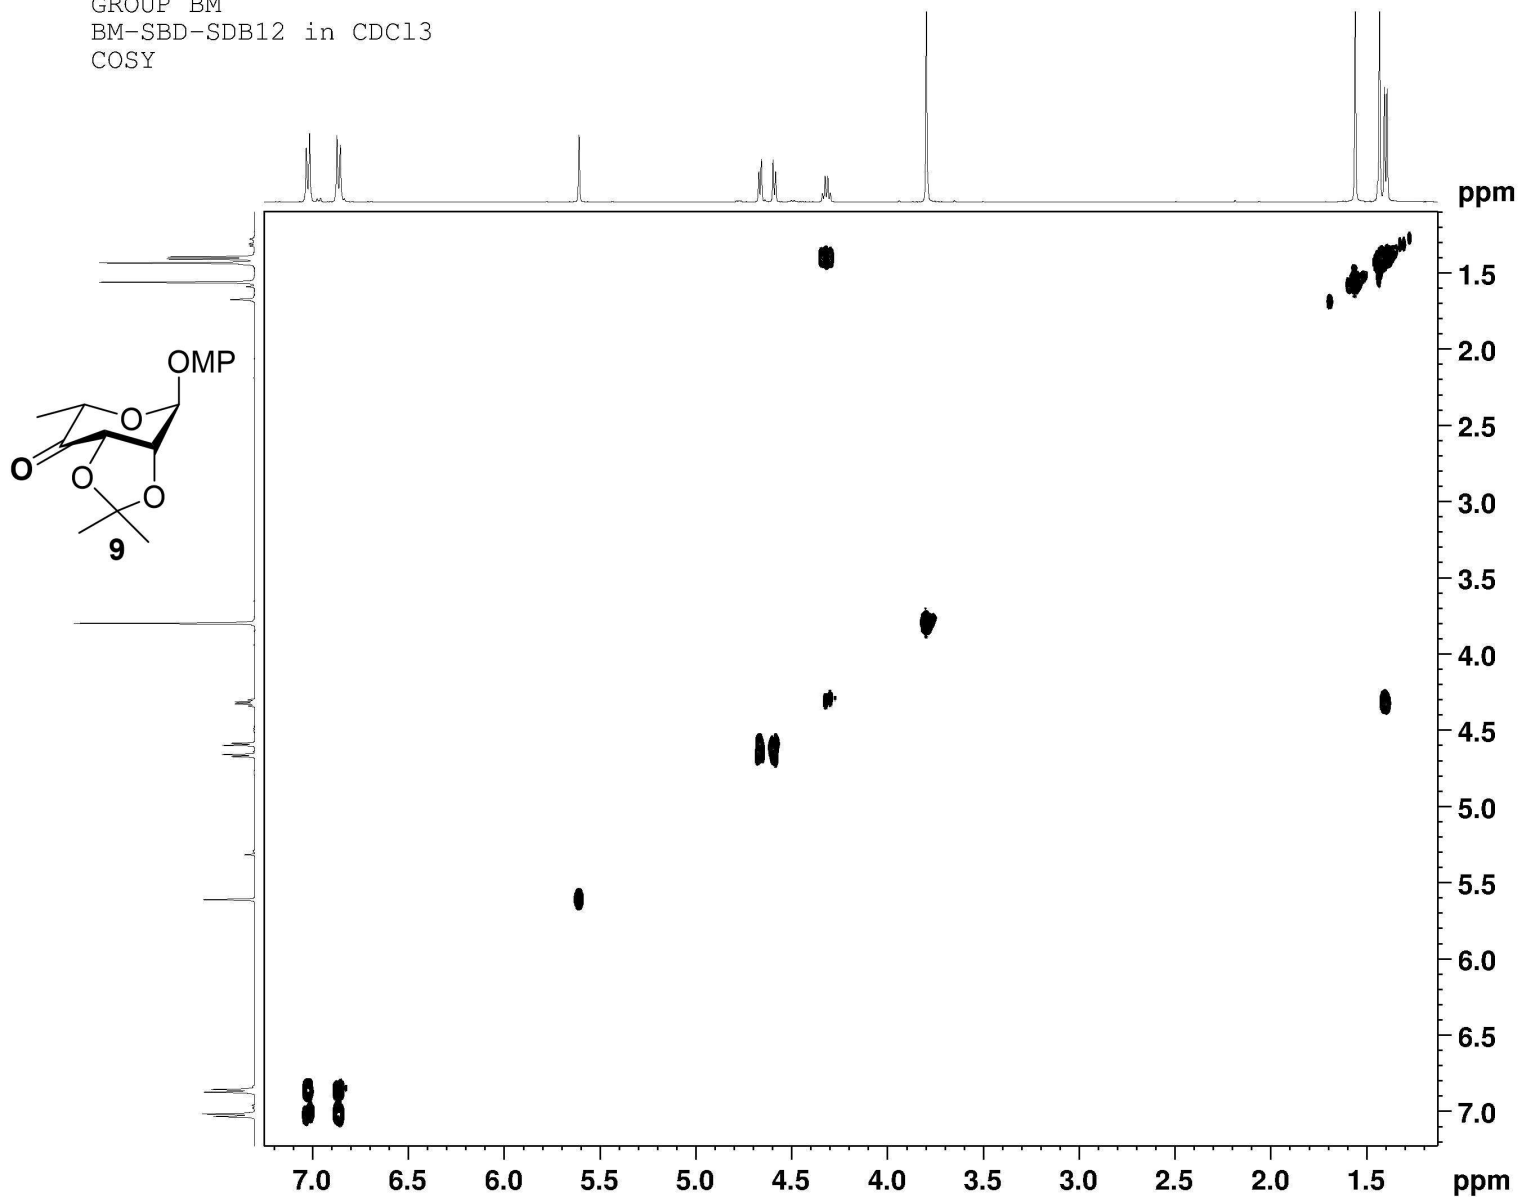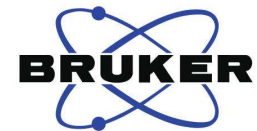

```
Current Data Parameters
NAME      BM-SBD-SDB12
EXPNO     762
PROCNO    1

F2 - Acquisition Parameters
Date_     20220825
Time      20.54
INSTRUM   Bruker_default_av50
PROBHD    5 mm PABBO BB/
PULPROG   cosypprogf
TD         2048
SOLVENT   CDCl3
NS         1
DS         8
SWH        5000.000 Hz
FIDRES     2.441406 Hz
AQ         0.2048000 sec
RG         16
DW         100.000 usec
DE         6.50 usec
TE         272.7 K
D0         0.00000000 sec
D1         2.00000000 sec
D11        0.03000000 sec
D12        0.00002000 sec
D13        0.00000400 sec
D16        0.00020000 sec
IN0        0.00019980 sec

===== CHANNEL f1 =====
SF01      500.4525023 MHz
NUC1      1H
P0        14.25 usec
P1        14.25 usec
P17       5000.00 usec
PLW1      18.00000000 W
PLR10     4.06129980 W

===== GRADIENT CHANNEL =====
GPNAM[1]  SMSQ10.100
GF11      10.00 %
P16       1000.00 usec

F1 - Acquisition parameters
TD         128
SF01      500.4525 MHz
FIDRES     78.203201 Hz
SW         10.001 ppm
F1MODE     QF

F2 - Processing parameters
SI         1024
SF         500.4500000 MHz
WDW        QSINE
SSB        0
LB         0 Hz
GB         0
PC         1.00

F1 - Processing parameters
SI         1024
MC2        QF
SF         500.4500000 MHz
WDW        QSINE
SSB        0
LB         0 Hz
GB         0
```

GROUP BM  
 BM-SBD-SDB12 in CDCl3  
 HSQCGP

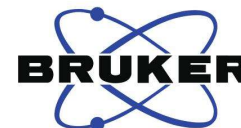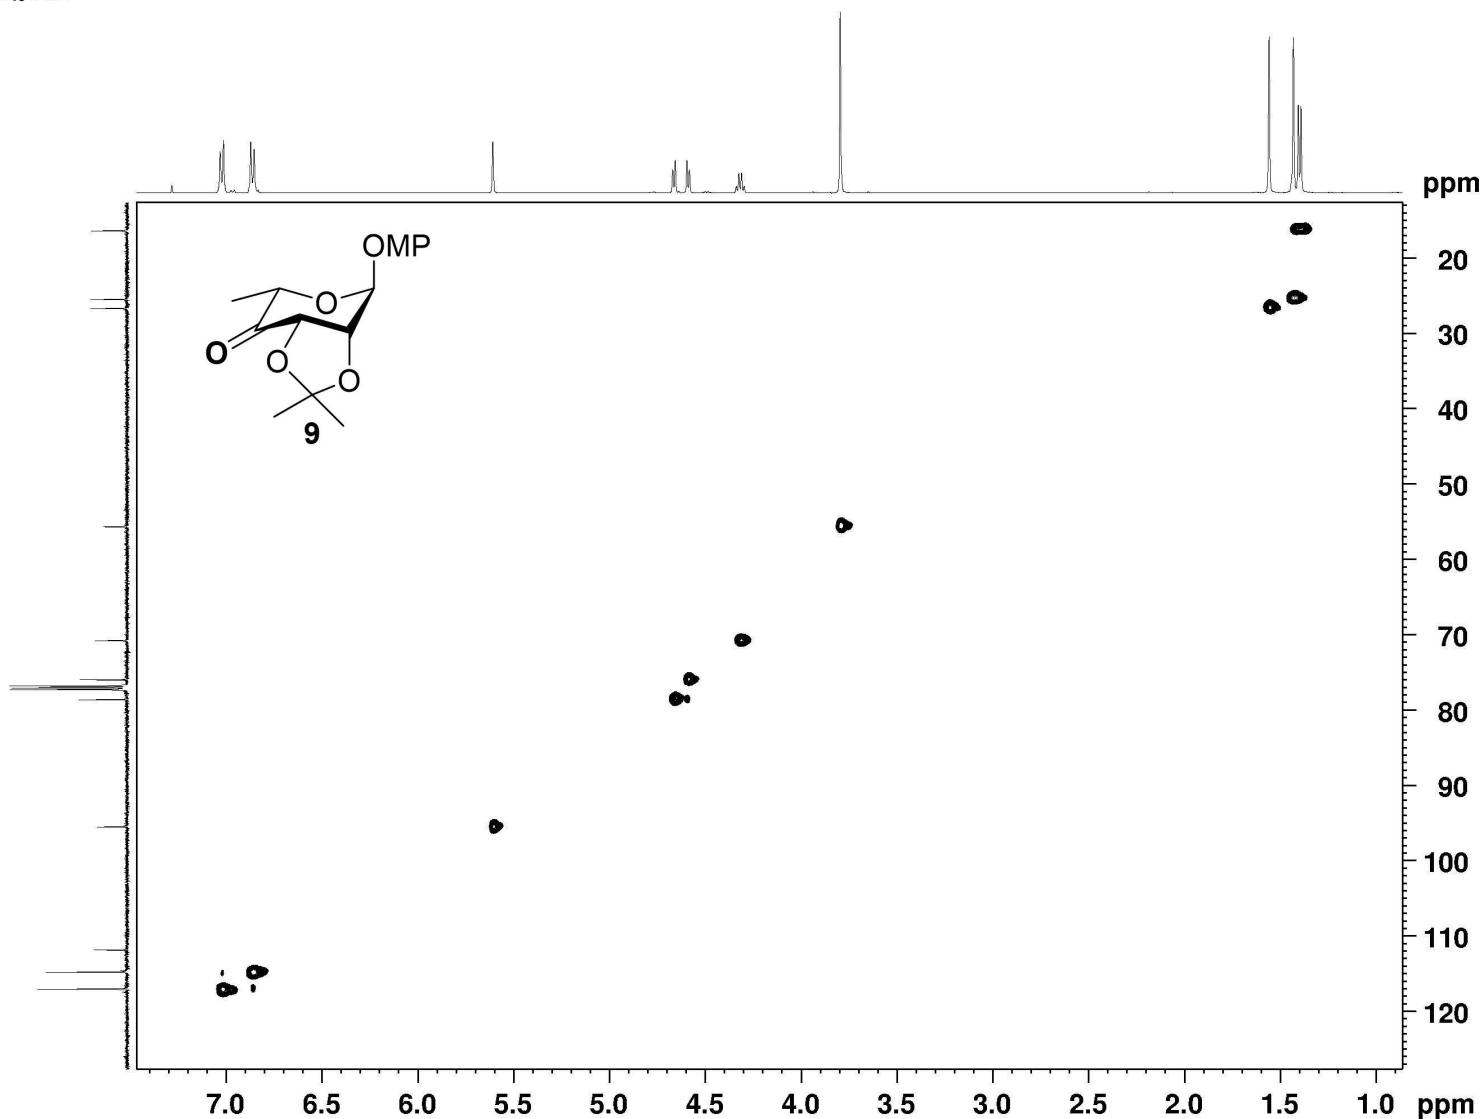

```

Current Data Parameters
NAME      BM-SBD-SDB12
EXPNO    763
PROCNO    1

F2 - Acquisition Parameters
Date_    20220825
Time     21.00
INSTRUM  Bruker_default_av500
PROBHD   5 mm F4BBO BB/
PULPROG  hsgcgps12
TD       1024
SOLVENT  CDCl3
NS       2
DS       16
SWH      5000.000 Hz
FIDRES   4.392313 Hz
AQ       0.1024000 sec
RG       16
DW       100.000 usec
DE       6.50 usec
TE       272.6 K
CNS1     145.0000000
D0       0.00000300 sec
D1       1.50000000 sec
D4       0.00172414 sec
D11      0.03000000 sec
D15      0.00020000 sec
D24      0.00086207 sec
SFO1     500.1360000 MHz
SFO2     125.7600000 MHz
ZGPGTNS  0.0001990 sec

----- CHANNEL f1 -----
SF01     500.4525023 MHz
NUC1     1H
P1       21.50 usec
P2       43.00 usec
P28      0 usec
PLW1     18.00000000 W

----- CHANNEL f2 -----
SF02     125.8508364 MHz
NUC2     13C
CPDPRG2  garp
P3       10.70 usec
P4       21.40 usec
PCPD2    70.00 usec
PLW2     75.00000000 W
PLW12    1.73240004 W

----- GRADIENT CHANNEL -----
GPNAM[1] SMSQ10.100
GPNAM[2] SMSQ10.100
GPNAM[3] SMSQ10.100
GPNAM[4] SMSQ10.100
GP21     80.00 %
GP22     20.10 %
GP23     11.00 %
GP24     -5.00 %
P16      1000.00 usec
P19      600.00 usec

F1 - Acquisition parameters
TD       188
SF01     125.8508 MHz
FIDRES   267.293915 Hz
SW       199.646 ppm
FMODE    Echo-Antiecho

F2 - Processing parameters
SI       1024
SF       500.4500000 MHz
WDW      QSTINE
SSB      2
LB       0 Hz
GB       0
PC       1.35

F1 - Processing parameters
SI       1024
MC2      echo-antiecho
SF       125.8382526 MHz
WDW      QSTINE
SSB      2
LB       0 Hz
GB       0
  
```

GROUP BM  
 BM-SBD-SDB13U 1H in CDCl3

7.0122  
 6.9941  
 6.8409  
 6.8229

5.6521

4.3774  
 4.3650  
 4.3547  
 4.2773  
 4.2645  
 4.0270  
 4.0140  
 4.0009  
 3.9880  
 3.7716  
 3.6473  
 3.6365  
 3.6259

2.2665  
 2.2543

1.6119  
 1.4271  
 1.2993  
 1.2861

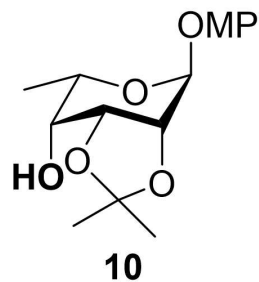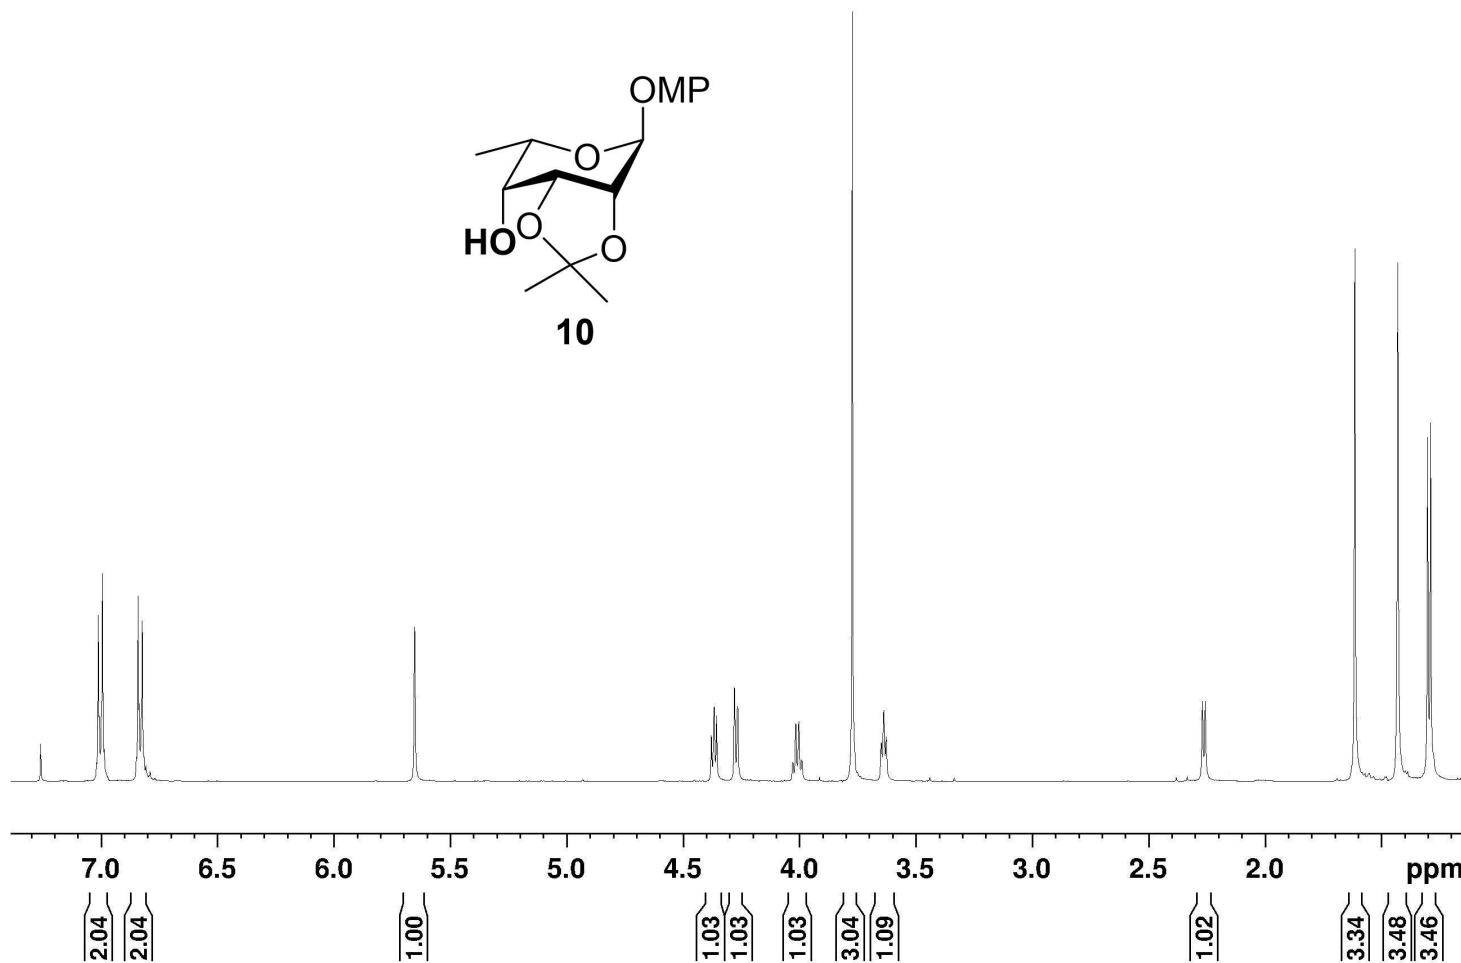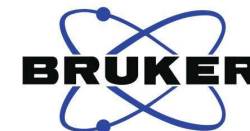

Current Data Parameters  
 NAME BM-SBD-SDB13U  
 EXPNO 140  
 PROCNO 1

F2 - Acquisition Parameters  
 Date\_ 20220807  
 Time 18.35  
 INSTRUM Bruker\_default\_av500  
 PROBHD 5 mm PABBO BB/  
 PULPROG zg30  
 TD 32768  
 SOLVENT CDCl3  
 NS 16  
 DS 2  
 SWH 10000.000 Hz  
 FIDRES 0.305176 Hz  
 AQ 1.6384000 sec  
 RG 16  
 DW 50.000 usec  
 DE 6.50 usec  
 TE 270.0 K  
 D1 1.00000000 sec  
 TDO 1

----- CHANNEL f1 -----  
 SF01 500.4525023 MHz  
 NUC1 1H  
 P1 21.50 usec  
 PLW1 18.00000000 W

F2 - Processing parameters  
 SI 16384  
 SF 500.4500120 MHz  
 WDW EM  
 SSB 0  
 LB 0.30 Hz  
 GB 0  
 PC 10.10

GROUP BM  
BM-SBD-SDB13U 13C in CDCl3

154.95  
150.37  
117.71  
114.63  
109.58  
96.79  
77.29  
77.03  
76.78  
73.37  
72.98  
66.71  
65.45  
55.64  
25.90  
25.28  
16.70

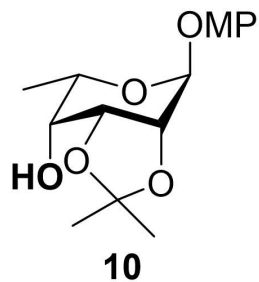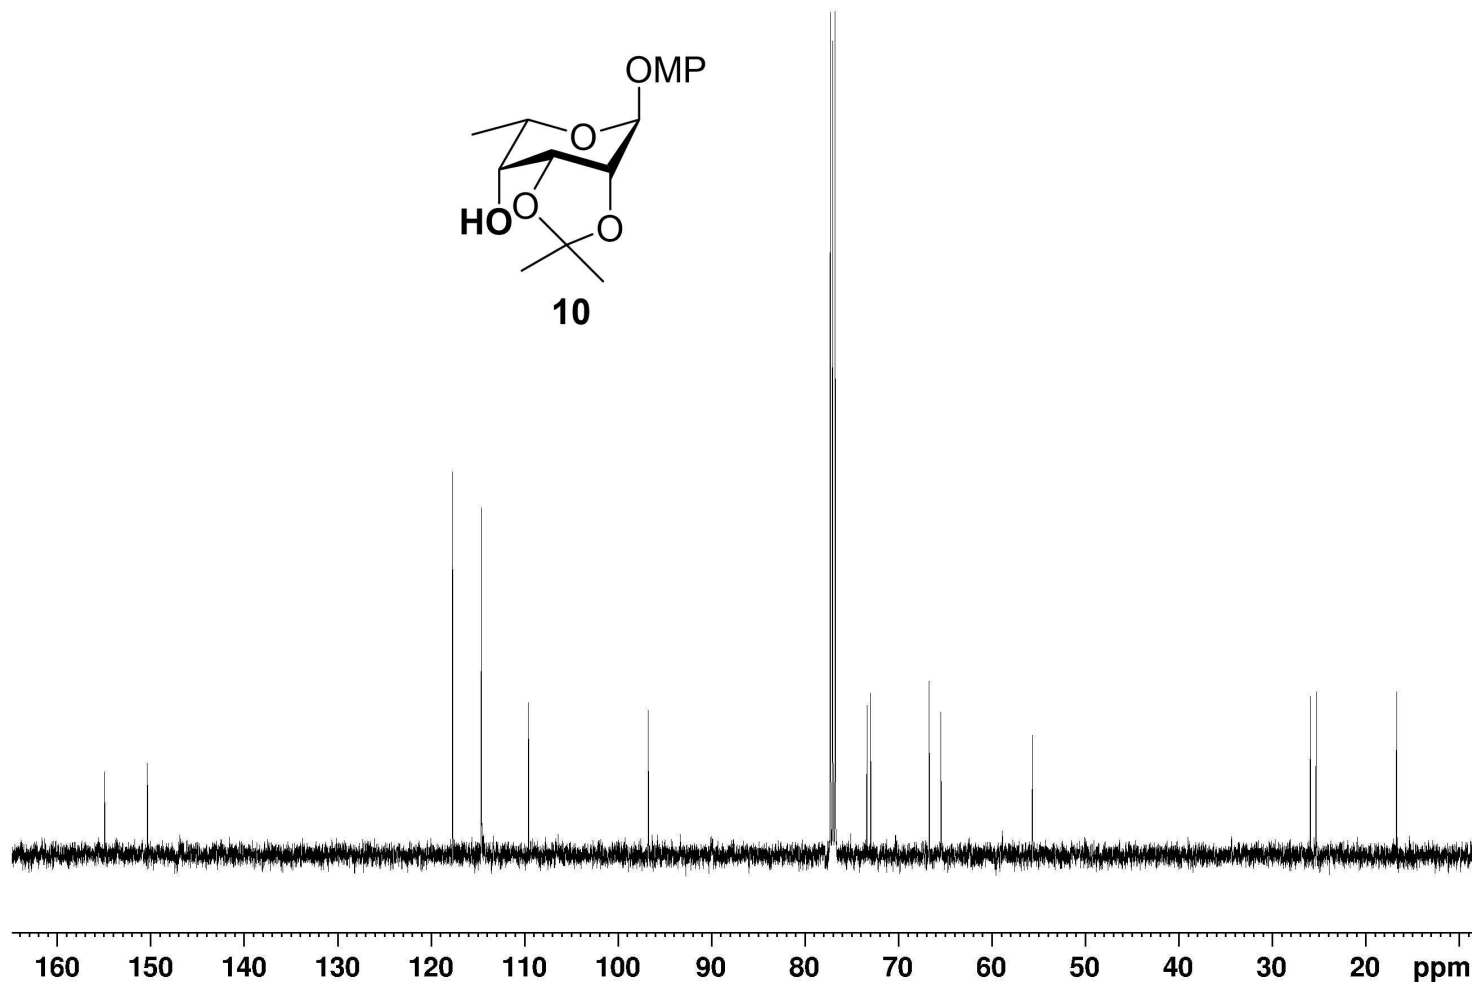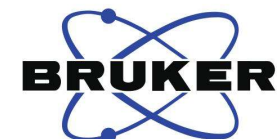

```
Current Data Parameters
NAME      BM-SBD-SDB13U
EXPNO     141
PROCNO    1

F2 - Acquisition Parameters
Date_     20220807
Time      18.39
INSTRUM   Bruker_default_av500
PROBHD    5 mm F4BBO BB/
PULPROG   zgpg30
TD        65536
SOLVENT   CDCl3
NS         68
DS         4
SWH        25252.525 Hz
FIDRES     0.385323 Hz
AQ         1.2976128 sec
RG         16
DW         19.600 usec
DE         6.50 usec
TE         270.2 K
D1         2.00000000 sec
D11        0.03000000 sec
TD0        1

===== CHANNEL f1 =====
SFO1      125.8508368 MHz
NUC1       13C
P1         10.70 usec
PLW1       75.00000000 W

===== CHANNEL f2 =====
SFO2      500.4520014 MHz
NUC2       1H
CPDPRG[2] waltz16
PCPD2      80.00 usec
PLW2       18.00000000 W
PLW12      0.57111001 W
PLW13      0.28727001 W

F2 - Processing parameters
SI         32768
SF         125.8382530 MHz
WDW        EM
SSB        0
LB         1.00 Hz
GB         0
PC         1.35
```

GROUP BM  
 BM-SBD-SDB13U in CDCl3  
 COSY

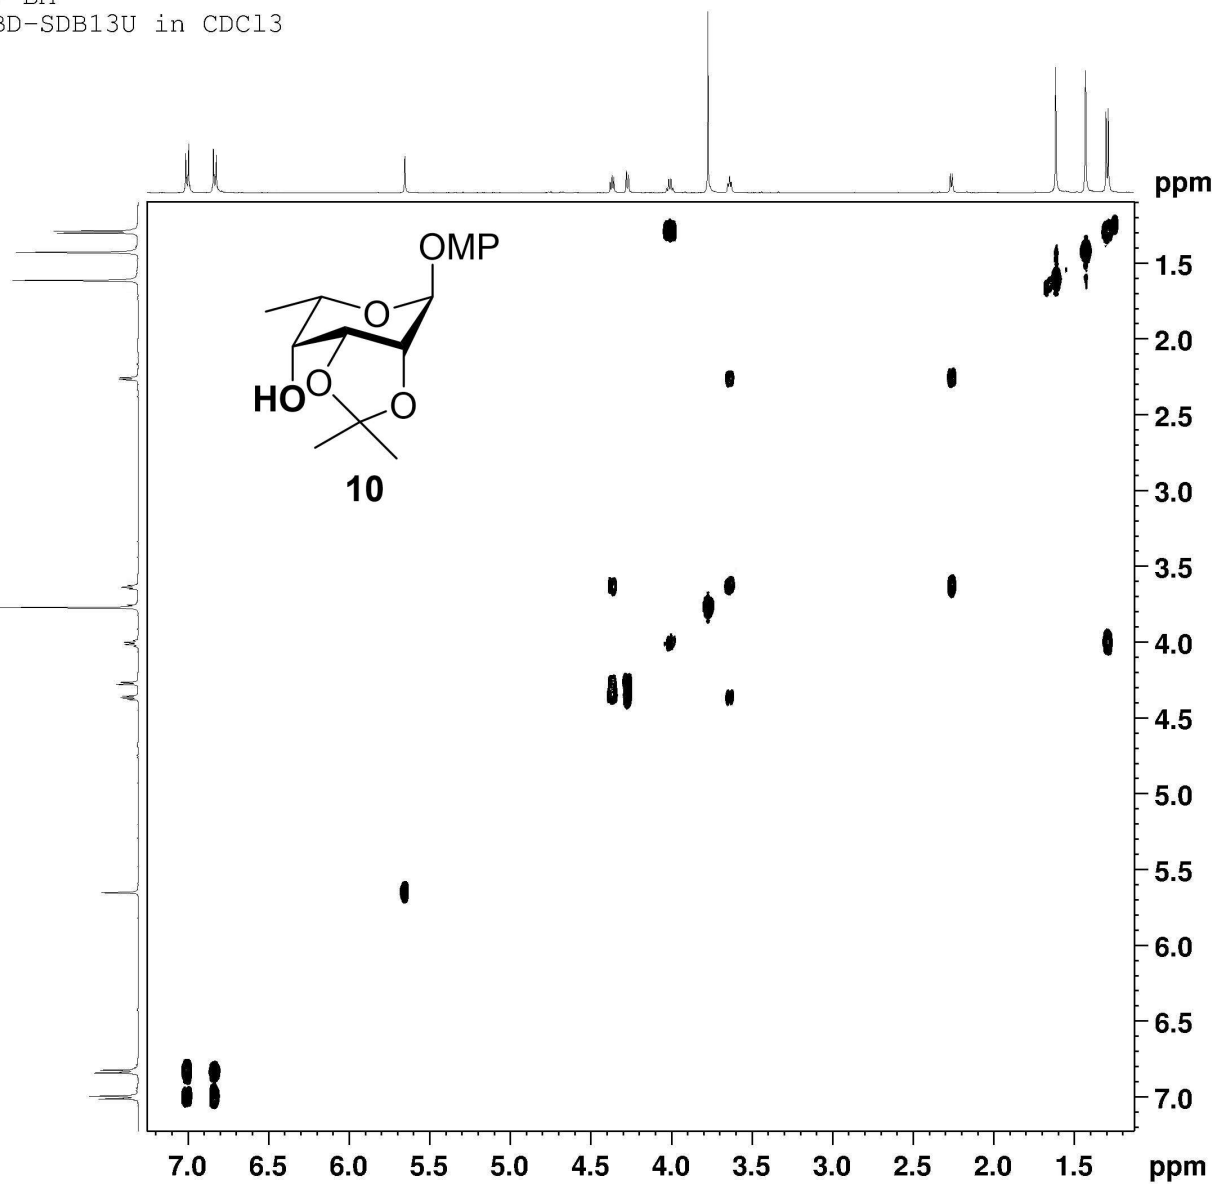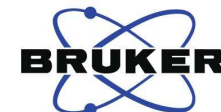

```

Current Data Parameters
NAME      BM-SBD-SDB13U
EXPNO    142
PROCNO   1

F2 - Acquisition Parameters
Date_    20220807
Time     18.42
INSTRUM  Bruker_default_av500
PROBHD   5 mm F4BBO BB/
PULPROG  cosygpppqr
TD        2048
SOLVENT  CDCl3
NS        1
DS        8
SWH       5000.000 Hz
FIDRES    2.441406 Hz
AQ        0.2048000 sec
RG        16
DW        100.000 usec
DE        6.50 usec
TE        270.5 K
DO        0.00000300 sec
D1        2.00000000 sec
D11       0.03000000 sec
D12       0.00020000 sec
D13       0.00004000 sec
D15       0.00020000 sec
LN0       0.00019980 sec

===== CHANNEL f1 =====
SF01     500.4525023 MHz
NUC1     1H
P0       14.25 usec
P1       14.25 usec
P17      5000.00 usec
PLW1     18.00000000 W
PLW10    4.06129980 W

===== GRADIENT CHANNEL =====
GPNAM[1] SMSQ10.100
GPZ1     10.00 %
P16      1000.00 usec

F1 - Acquisition parameters
TD        128
SF01     500.4525 MHz
FIDRES    78.203201 Hz
SW        10.001 ppm
EnMODE    QF

F2 - Processing parameters
SI        1024
SF        500.4500114 MHz
WDW       QSINE
SSB       0
LB        0 Hz
GB        0
PC        1.00

F1 - Processing parameters
SI        1024
WDW2     QF
SF        500.4500122 MHz
WDW       QSINE
SSB       0
LB        0 Hz
GB        0
  
```

GROUP BM  
 BM-SBD-SDB13U in CDCl3  
 HSQC

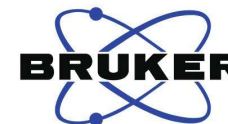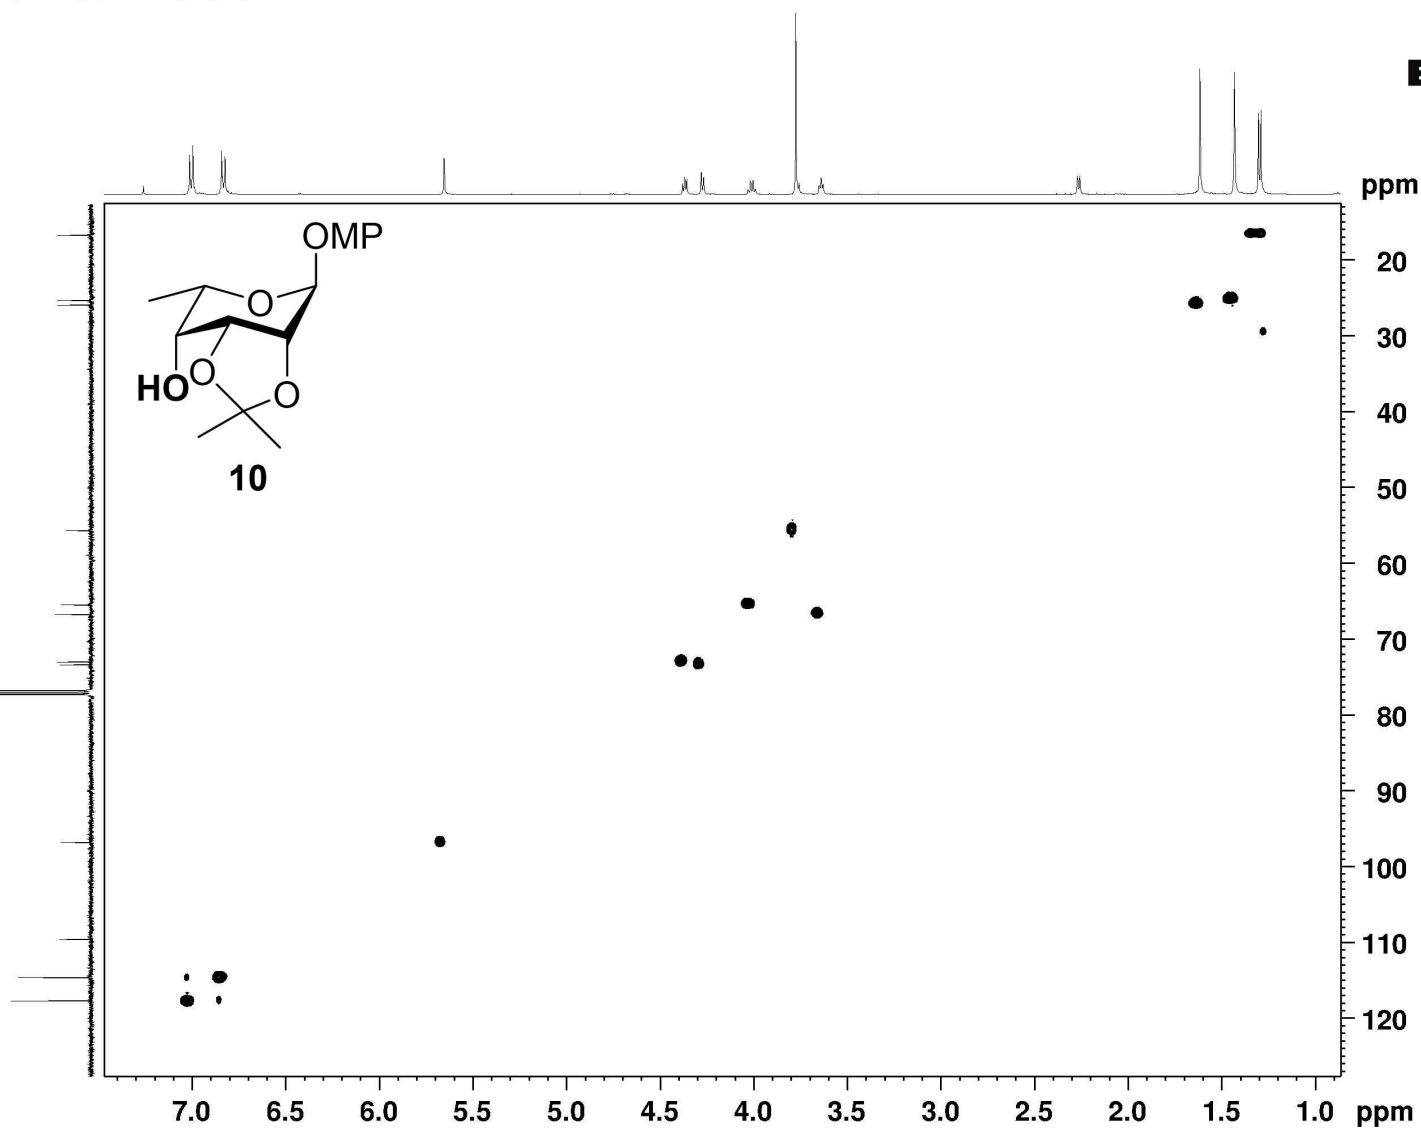

```

Current Data Parameters
NAME      BM-SBD-SDB13U
EXENO    143
PROCNO   1

F2 - Acquisition Parameters
Date_    20220807
Time     18.49
INSTRUM  Bruker_defaut_av500
PROBHD   5 mm F4BBO BB/
PULPROG  hsqcetps12
TD       1024
SOLVENT  CDCl3
NS       2
DS       16
SWH      5000.000 Hz
FIDRES   4.882812 Hz
AQ       0.1024000 sec
RG       16
DW       100.000 usec
DE       6.50 usec
TE       270.7 K
CNS122   145.000000
D0        0.00000300 sec
D1        1.50000000 sec
D4        0.00172414 sec
D11       0.03000000 sec
D16       0.00020000 sec
D24       0.00086207 sec
fNO      0.00001990 sec
ZGPTNS

----- CHANNEL f1 -----
SF01    500.4525023 MHz
NUC1     1H
P1       21.50 usec
P2       43.00 usec
P28      0 usec
PLW1     18.00000000 W

----- CHANNEL f2 -----
SF02    125.8508364 MHz
NUC2     13C
CPDPRG2  garrp
P3       10.70 usec
P4       21.40 usec
PCPD2    70.00 usec
PLW2     75.00000000 W
PLW12    1.75240004 W

===== GRADIENT CHANNEL =====
GPNAM[1] SMSQ10.100
GPNAM[2] SMSQ10.100
GPNAM[3] SMSQ10.100
GPNAM[4] SMSQ10.100
GPZ1     80.00 %
GPZ2     20.10 %
GPZ3     11.00 %
GPZ4     -5.00 %
P16      1000.00 usec
P19      500.00 usec

F1 - Acquisition parameters
TD       256
SF01     125.8508 MHz
FIDRES   196.293976 Hz
SW       199.646 ppm
F0MODE   Echo-Antlecho

F2 - Processing parameters
SI       1024
SF       500.4500000 MHz
WDW      QSIINE
SSB      2
LB       0 Hz
GB       0
PC       1.35

F1 - Processing parameters
SI       1024
MC2      echo-antlecho
SF       125.838256 MHz
WDW      QSIINE
SSB      2
LB       0 Hz
GB       0
  
```

GROUP BM  
BM-SBBD-SD32 1H in CDC13

7.0151  
6.9978  
6.8539  
6.8366

5.5022  
5.4767  
5.3008  
5.2464

4.3193  
4.3063

3.7875

2.1974  
2.1898  
2.0405

1.2164  
1.2035

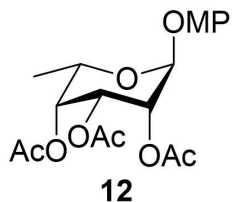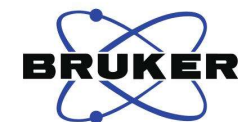

Current Data Parameters  
NAME BM-SBD-SD32  
EXPNO 280  
PROCNO 1

F2 - Acquisition Parameters  
Date\_ 20221218  
Time 21.22  
INSTRUM Bruker\_default\_av500  
PROBHD 5 mm PABBO BB/  
PULPROG zg30  
TD 32768  
SOLVENT CDC13  
NS 16  
DS 2  
SWH 10000.000 Hz  
FIDRES 0.305176 Hz  
AQ 1.6384000 sec  
RG 25.4  
DW 50.000 usec  
DE 6.50 usec  
TE 284.4 K  
D1 1.0000000 sec  
TD0 1

===== CHANNEL f1 =====  
SFO1 500.4530027 MHz  
NUC1 1H  
P1 14.25 usec  
PLW1 18.0000000 W

F2 - Processing parameters  
SI 16384  
SF 500.4500000 MHz  
WDW EM  
SSB 0  
LB 0.30 Hz  
GB 0  
PC 10.10

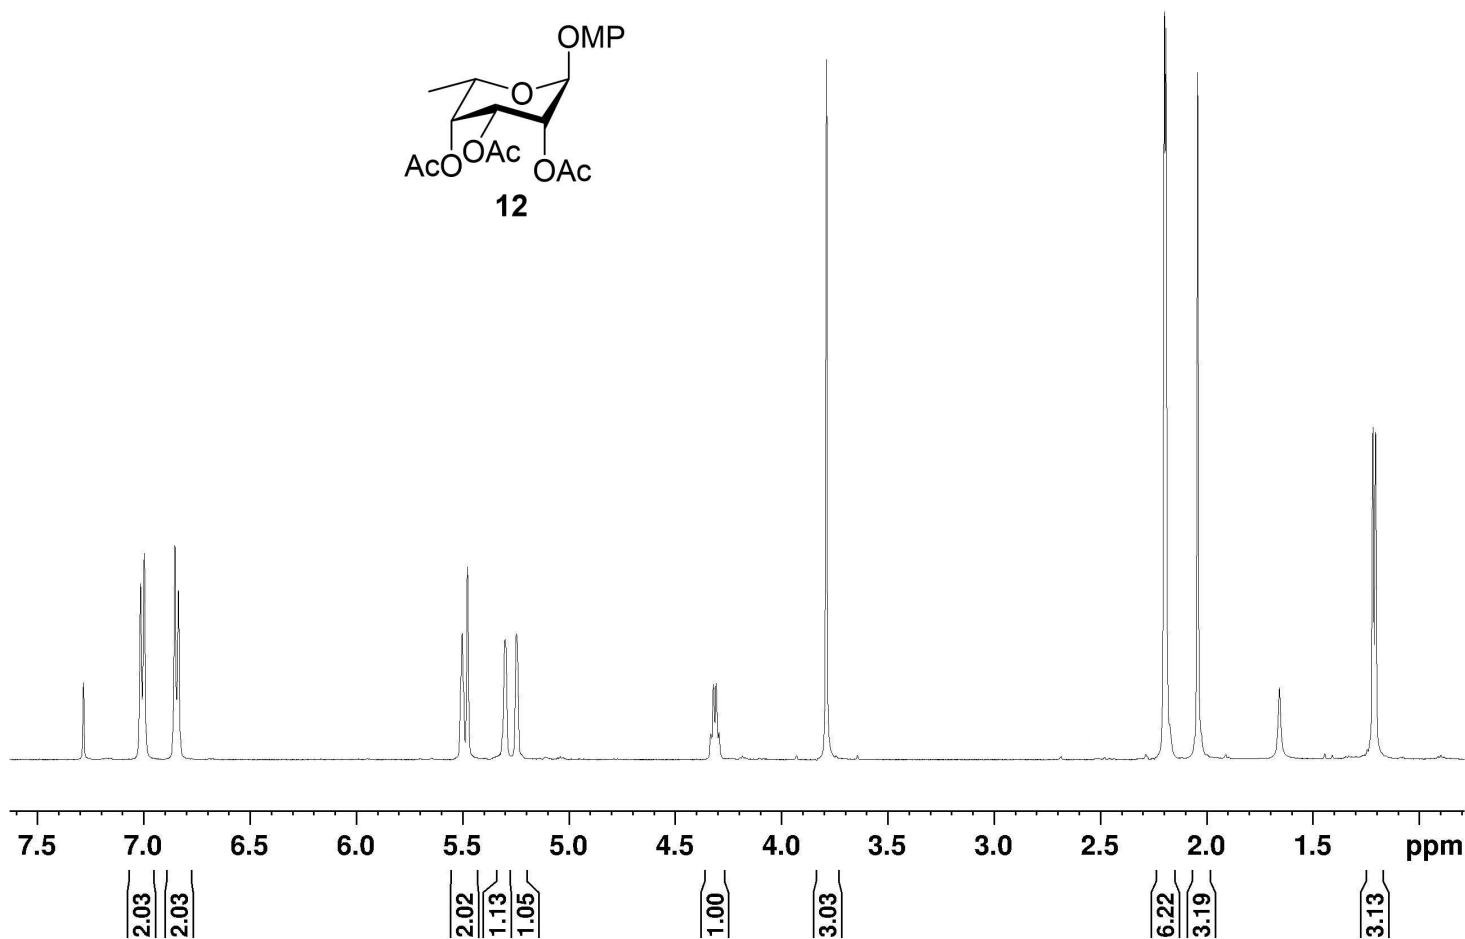



GROUP BM  
 BM-SBBD-SD32 13C in CDCl3

170.64  
 170.14  
 169.79

155.34

150.13

117.58

114.85

97.49

77.40

77.15

76.89

69.00

67.37

66.08

65.67

55.77

21.04

20.79

20.75

16.23

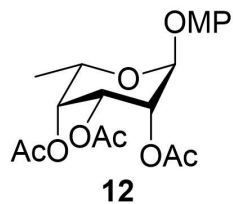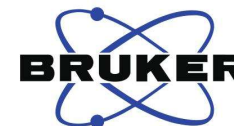

```

Current Data Parameters
NAME      BM-SBD-SD32
EXPNO     281
PROCNO    1

F2 - Acquisition Parameters
Date_     20221218
Time      21:29
INSTRUM   Bruker_default_av500
PROBHD    5 mm PABBO BB/
PULPROG   zgpg30
TD         65536
SOLVENT   CDCl3
NS         128
DS         4
SWH        35714.285 Hz
FIDRES     0.544987 Hz
AQ         0.9175040 sec
RG         25.4
DW         14.000 usec
DE         6.50 usec
TE         284.2 K
D1         2.00000000 sec
D11        0.03000000 sec
TD0        1

----- CHANNEL f1 -----
SFO1      125.8520952 MHz
NUC1       13C
P1         10.70 usec
PLW1       75.00000000 W

----- CHANNEL f2 -----
SFO2      500.4520014 MHz
NUC2       1H
CPDPRG12   waltz16
PCPD2      80.00 usec
PLW2       18.00000000 W
PLW12      1.30009997 W
PLW13      0.65393001 W

F2 - Processing parameters
SI          32768
SF          125.8382367 MHz
WDW         EM
SSB         0
LB          1.00 Hz
GB          0
PC          1.35
  
```

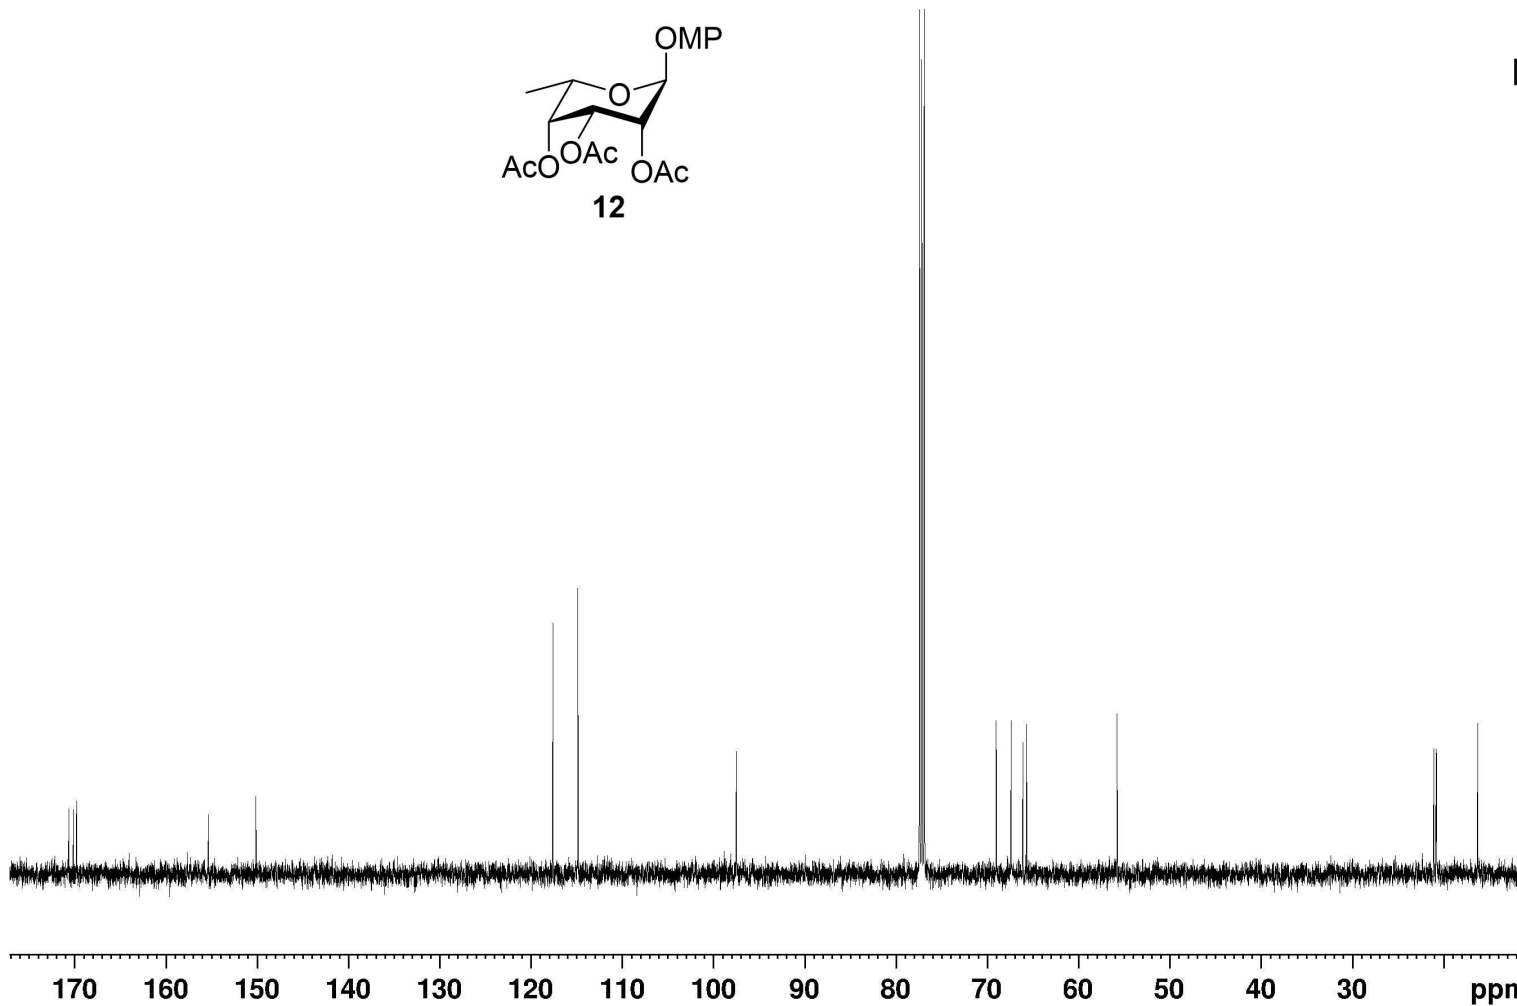

GROUP BM  
 BM-SBBD-SD32  
 COSY

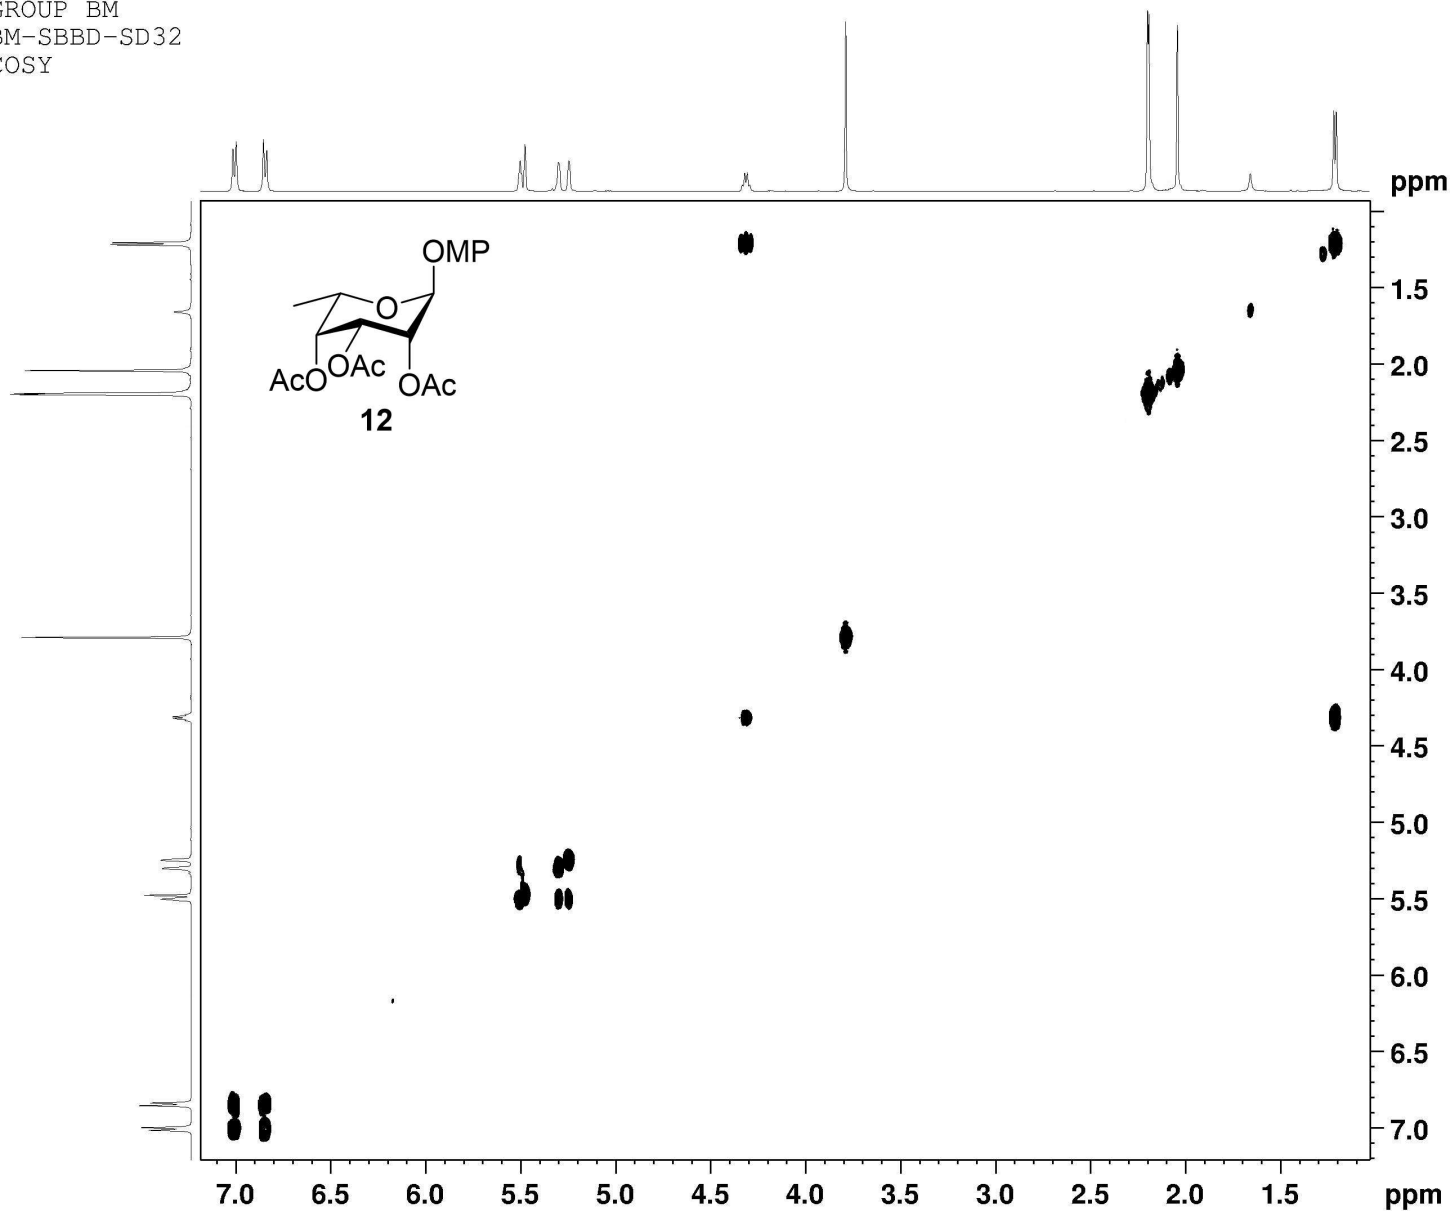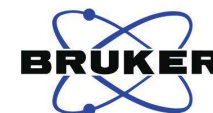

```

Current Data Parameters
NAME      BM-SBBD-SD32
EXPNO    282
PROCNO    1

F2 - Acquisition Parameters
Date_     20221218
Time      21.29
INSTRUM   Bruker_default_av500
PROBHD    5 mm PABBO BB/
PULPROG   cosyppppqf
TD         2048
SOLVENT   CDCl3
NS         1
DS         8
SWH        5000.000 Hz
FIDRES     2.441406 Hz
AQ         0.2048000 sec
RG         25.4
DW         100.000 usec
DE         6.50 usec
TE         284.2 K
D0         0.00000300 sec
D1         2.00000000 sec
D11        0.03000000 sec
D12        0.00002000 sec
D13        0.00000400 sec
D16        0.00020000 sec
INO        0.00019980 sec

----- CHANNEL f1 -----
SF01      500.4525023 MHz
NUC1       1H
P0         21.50 usec
P1         21.50 usec
P17        5000.00 usec
PLW1       18.00000000 W
PLW1G      9.24499989 W

===== GRADIENT CHANNEL =====
GPNAM[1]   SMSQ10.100
GP21       10.00 %
P16        1000.00 usec

F1 - Acquisition parameters
TD         128
SF01       500.4525 MHz
FIDRES     78.203201 Hz
SW         10.001 ppm
EnMODE     QF

F2 - Processing parameters
SI         1024
SF         500.4500000 MHz
WDW        QSINE
SSB        0
LB         0 Hz
GB         0
PC         1.00

F1 - Processing parameters
SI         1024
MC2        QF
SF         500.4500000 MHz
WDW        QSINE
SSB        0
LB         0 Hz
GB         0
  
```

GROUP BM  
 BM-SBBD-SD32 in CDCl3  
 HSQC/GP

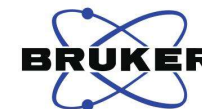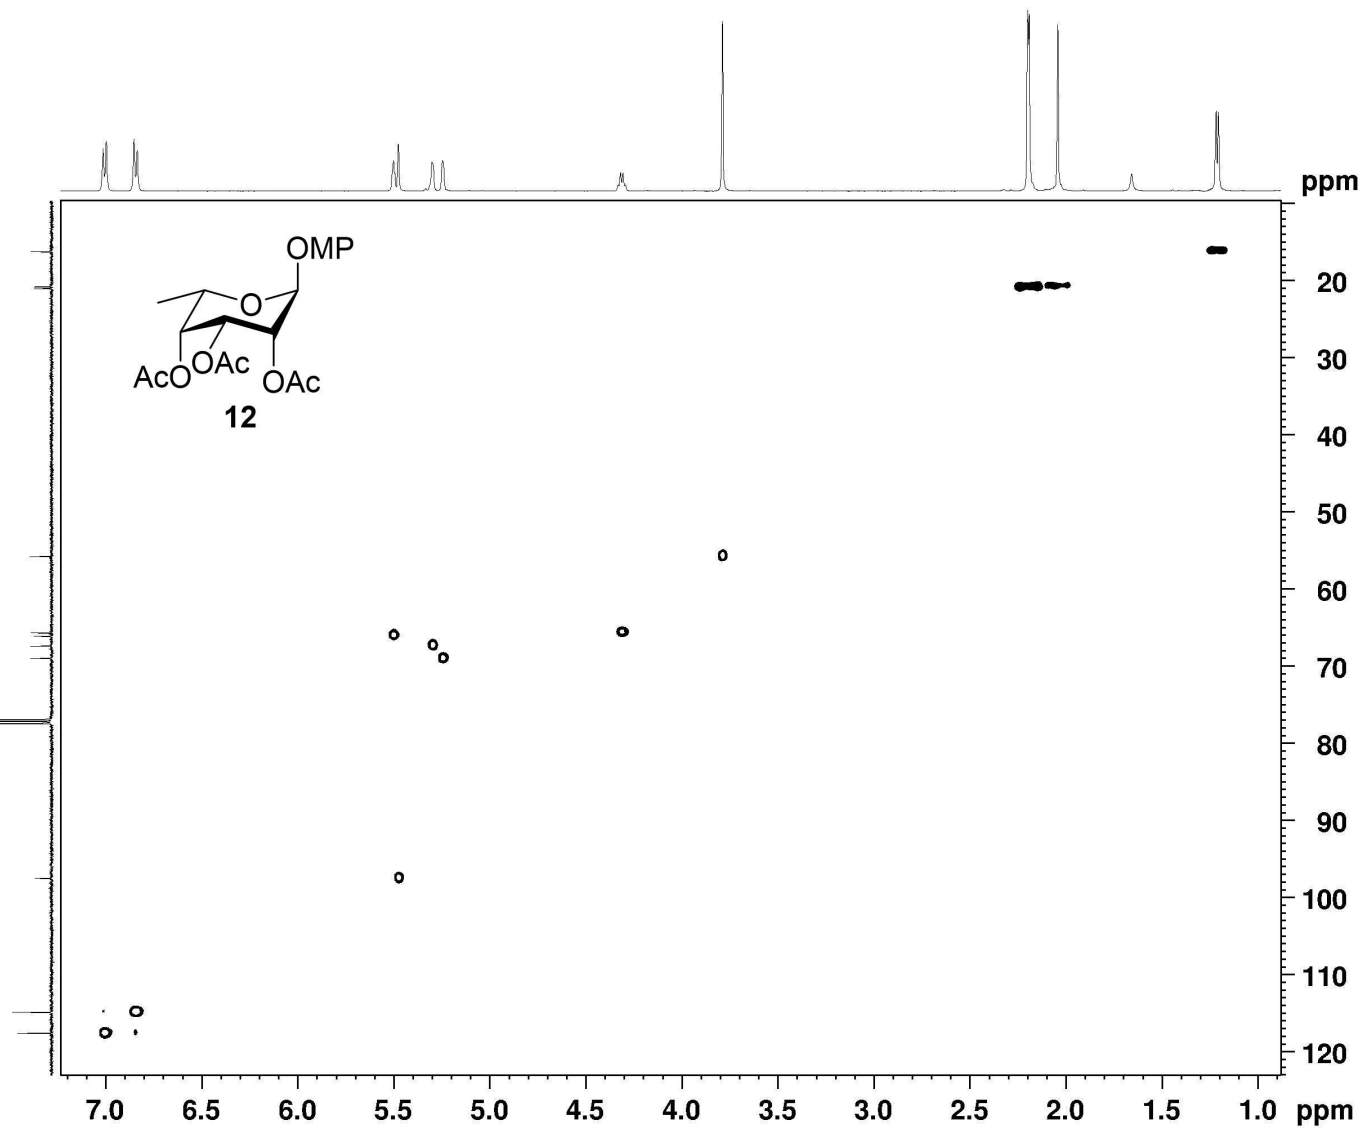

```

Current Data Parameters
NAME      BM-SBBD-SD32
EXPNO    283
PROCNO    1

F2 - Acquisition Parameters
Date_    20221218
Time     21.35
INSTRUM  Bruker_defaut_av500
PROBHD   5 mm PABBO BB/
PULPROG  hsqcetgps12
TD       1024
SOLVENT  CDCl3
NS       2
DS       16
SWH      5000.000 Hz
FIDRES   4.882812 Hz
AQ       0.1024000 sec
RG       25.4
DW       100.000 usec
DE       6.50 usec
TE       284.0 K
CNFT2    145.000000
DO       0.0000000 sec
D1       1.5000000 sec
D4       0.00172414 sec
D11      0.0300000 sec
D16      0.0002000 sec
D24      0.00086207 sec
END      0.00001990 sec
ZGPGTNS

===== CHANNEL f1 =====
SF01    500.4525023 MHz
NUC1     1H
P1      21.50 usec
P2      43.00 usec
P28     0 usec
PLW1    18.00000000 W

===== CHANNEL f2 =====
SF02    125.8308368 MHz
NUC2     13C
CPDPRG2 9atp
P3      10.70 usec
P4      21.40 usec
PCPD2   70.00 usec
PLW2    75.00000000 W
PLW12   1.75240004 W

===== GRADIENT CHANNEL =====
GPNAM[1] SMSQ10.100
GPNAM[2] SMSQ10.100
GPNAM[3] SMSQ10.100
GPNAM[4] SMSQ10.100
GP21    80.00 %
GP22    20.10 %
GP23    11.00 %
GP24    -5.00 %
P16     1000.00 usec
P19     600.00 usec

F1 - Acquisition parameters
TD      256
SF01    125.8508 MHz
FIDRES   196.293976 Hz
SN       199.646 ppm
FnMODE   Echo-Antiecho

F2 - Processing parameters
SI      1024
SF      500.4500000 MHz
WDW     QSINE
SSB     2
LB      0 Hz
GB      0
PC      1.35

F1 - Processing parameters
SI      1024
MC2     echo-antiecho
SF      125.8382530 MHz
WDW     QSINE
SSB     2
LB      0 Hz
GB      0
  
```

GROUP BM  
 BM-SBD-SD43NN in CDCl3

7.4957  
 7.4904  
 7.4869  
 7.4801  
 7.4764  
 7.3888  
 7.3817  
 7.3781  
 7.3746  
 7.3687  
 7.3654  
 7.2841  
 7.1637  
 7.1479  
 5.6337  
 5.5975  
 5.5949  
 5.5905  
 5.5879  
 5.4020  
 5.3997  
 5.2684  
 5.2609  
 5.2534  
 5.0058  
 4.9987  
 4.9878  
 4.9851  
 4.9830  
 4.9803  
 4.9773  
 4.9756  
 4.9600  
 4.2723  
 4.2642  
 4.2521  
 4.2444  
 4.0453  
 4.0258  
 3.9056  
 3.8849  
 2.3566  
 2.1921  
 2.1487  
 2.1468  
 1.9836  
 0.9281  
 0.9150

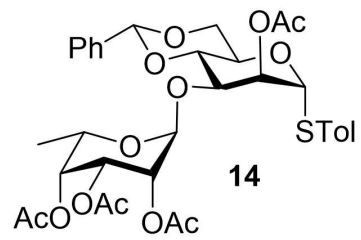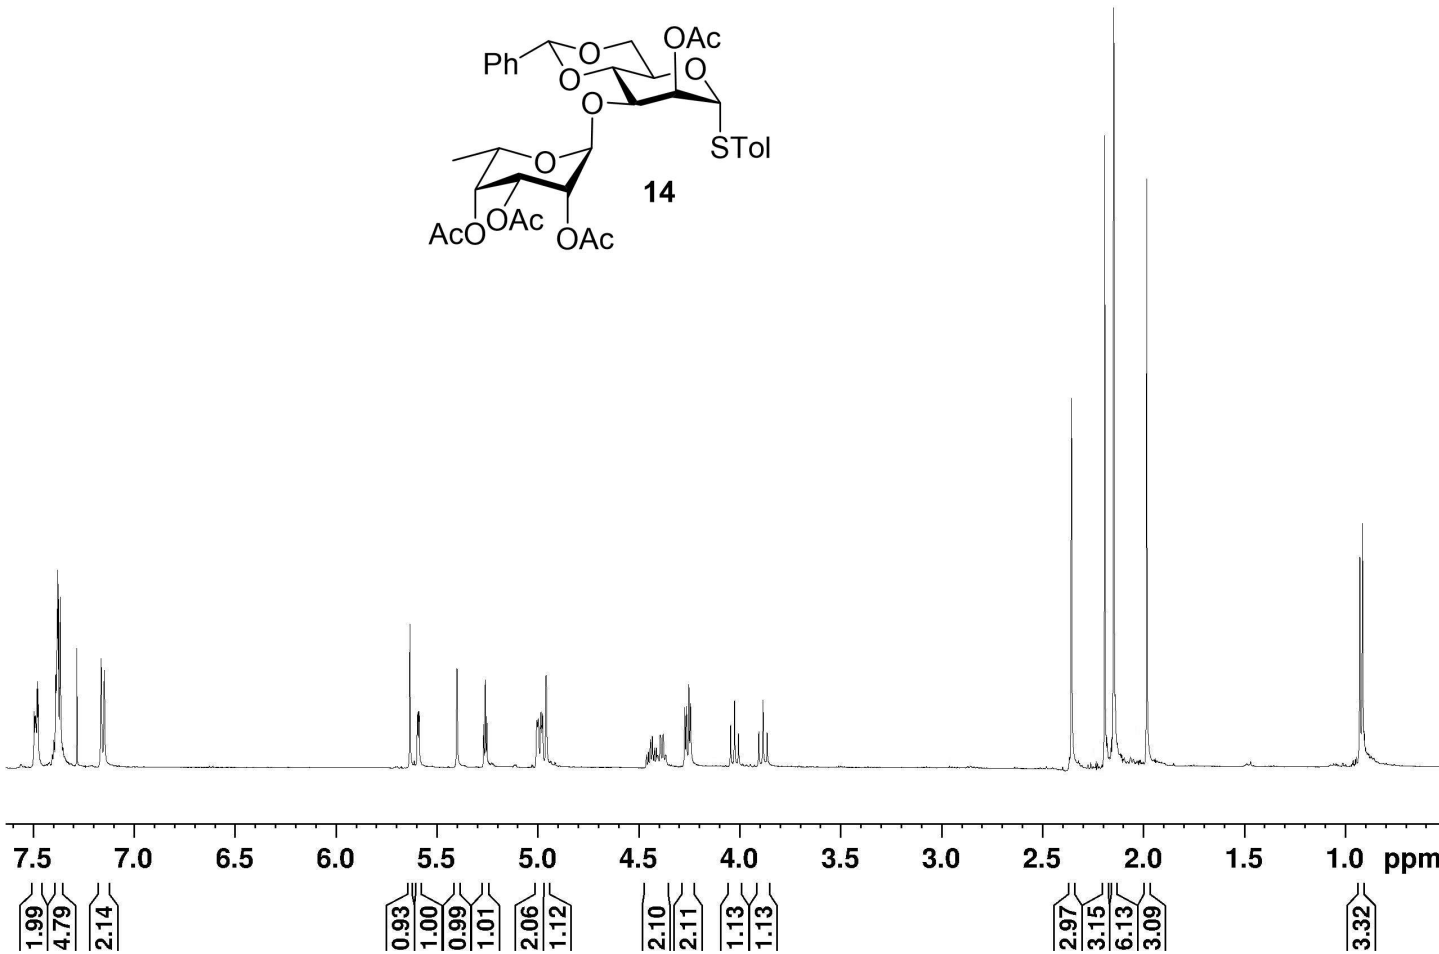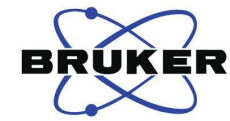

Current Data Parameters  
 NAME BM-SBD-SD43NN  
 EXPNO 350  
 PROCNO 1

F2 - Acquisition Parameters  
 Date\_ 20230613  
 Time 13.14 h  
 INSTRUM AV4 500MHz  
 PROBHD Z119467\_0011 ( )  
 PULPROG zg30  
 TD 40000  
 SOLVENT CDCl3  
 NS 8  
 DS 0  
 SWH 10000.000 Hz  
 FIDRES 0.500000 Hz  
 AQ 2.000000 sec  
 RG 101  
 DW 50.000 usec  
 DE 10.11 usec  
 TE 297.2 K  
 D1 1.0000000 sec  
 TD0 1  
 SF01 500.1430884 MHz  
 NUC1 1H  
 P0 4.67 usec  
 P1 14.00 usec  
 PLW1 13.47399998 W

F2 - Processing parameters  
 SI 65536  
 SF 500.1400000 MHz  
 WDW EM  
 SSB 0  
 LB 0.30 Hz  
 GB 0  
 PC 1.00

GROUP BM  
BM-SBD-SD43 in CDCl3

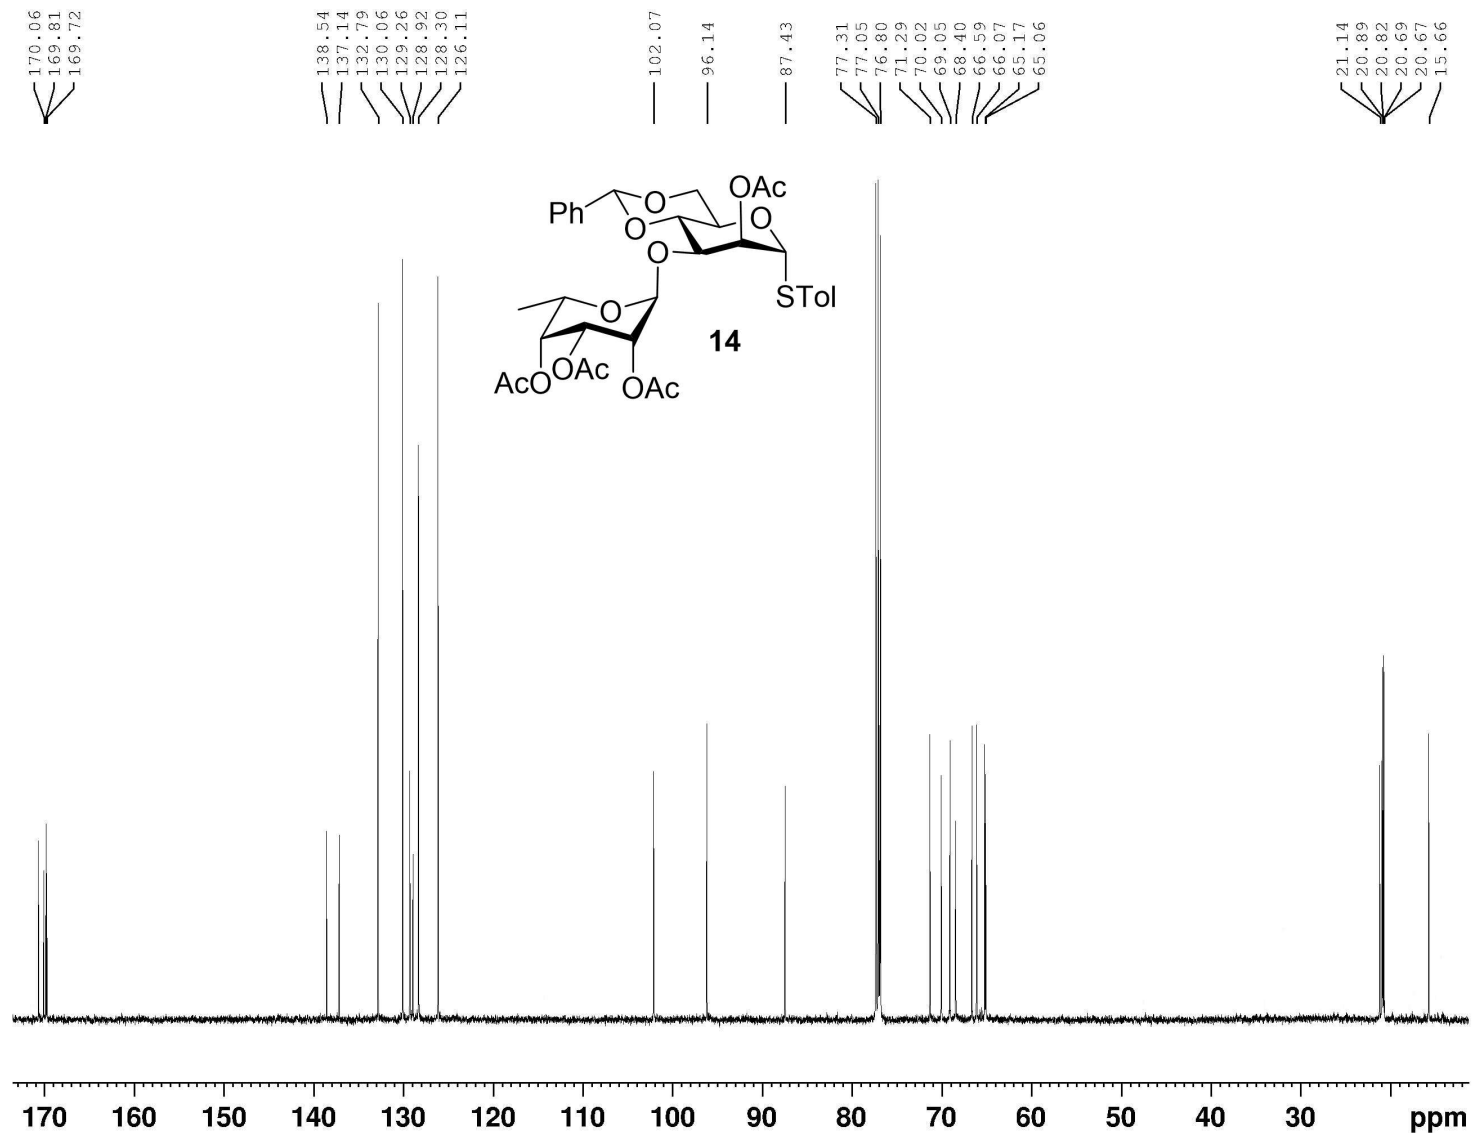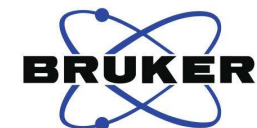

Current Data Parameters  
 NAME BM-SBD-SD43  
 EXPNO 643  
 PROCNO 1

F2 - Acquisition Parameters  
 Date\_ 20230518  
 Time 0.48 h  
 INSTRUM AV4 500MHz  
 PROBHD Z119467\_0011 (  
 PULPROG zgpg30  
 TD 65536  
 SOLVENT CDCl3  
 NS 1024  
 DS 4  
 SWH 30120.482 Hz  
 FIDRES 0.919204 Hz  
 AQ 1.0878977 sec  
 RG 101  
 DW 16.600 usec  
 DE 6.50 usec  
 TE 298.9 K  
 D1 2.00000000 sec  
 D11 0.03000000 sec  
 TD0 1  
 SFO1 125.7728791 MHz  
 NUC1 13C  
 P0 3.33 usec  
 P1 10.00 usec  
 PLW1 77.33000183 W  
 SFO2 500.1420006 MHz  
 NUC2 1H  
 CPDPRG[2] waltz65  
 PCPD2 80.00 usec  
 PLW2 13.47399998 W  
 PLW12 0.41264001 W  
 PLW13 0.20756000 W

F2 - Processing parameters  
 SI 32768  
 SF 125.7603030 MHz  
 WDW EM  
 SSB 0  
 LB 1.00 Hz  
 GB 0  
 PC 1.40

GROUP BM  
BM-SBD-SD43 in CDCl3

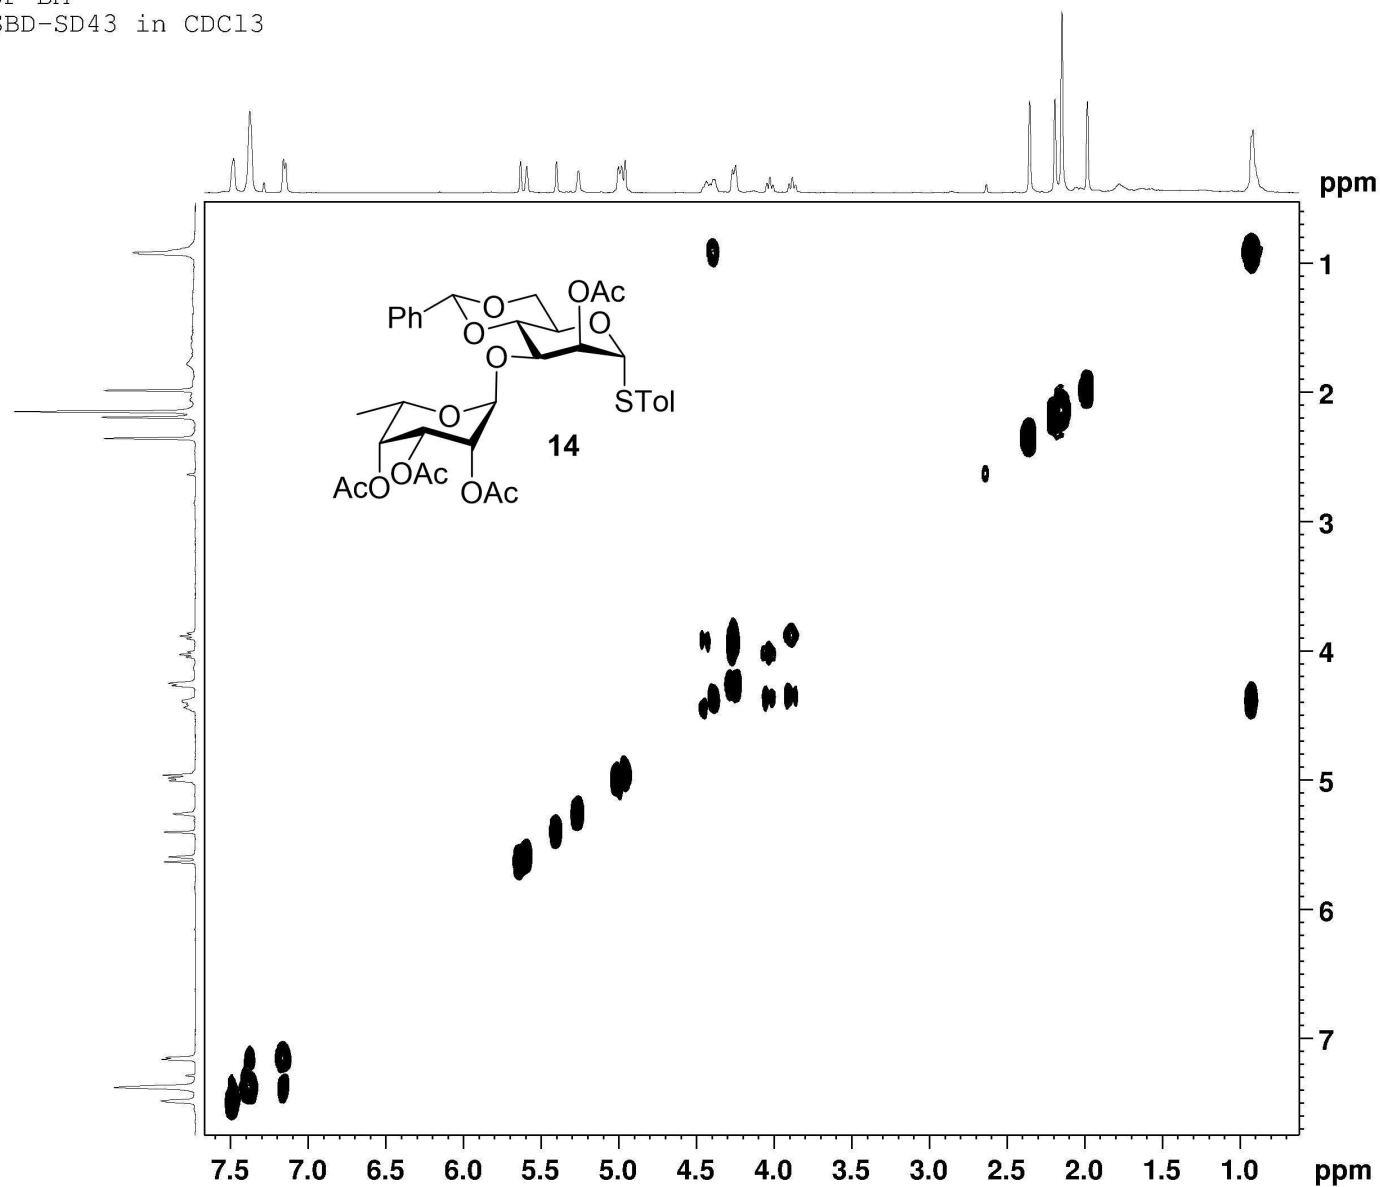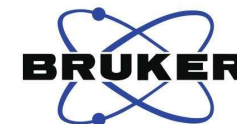

Current Data Parameters  
NAME EM-SBD-SD43  
EXPNO 341  
PROCNO 1

F2 - Acquisition Parameters  
Date\_ 20230517  
Time 22.53 h  
INSTRUM AV4 500MHz  
PROBHD Z119467\_0011 (  
PULPROG cosygpppgf  
TD 2048  
SOLVENT CDCl3  
NS 4  
DS 16  
SWH 10000.000 Hz  
FIDRES 9.765625 Hz  
AQ 0.1024000 sec  
RG 64  
DW 50.000 usec  
DE 6.50 usec  
TE 298.1 K  
D0 0.0000000 sec  
D1 2.0000000 sec  
D11 0.0300000 sec  
D12 0.0002000 sec  
D13 0.0000400 sec  
D15 0.0002000 sec  
IN0 0.0009997 sec  
TDav 1  
SF01 500.1430008 MHz  
NUC1 1H  
P0 14.00 usec  
P1 14.00 usec  
P17 2500.00 usec  
PLW1 13.47399998 W  
PLW10 2.93440008 W  
GPMAM[1] SMSQ10.100  
GP21 10.00 %  
P16 1000.00 usec

F1 - Acquisition parameters  
TD 128  
SF01 500.143 MHz  
FIDRES 156.289078 Hz  
SW 19.993 ppm  
FnMODE QF

F2 - Processing parameters  
SI 1024  
SF 500.1400000 MHz  
WDW QSINE  
SSE 0  
LB 0 Hz  
GB 0  
EC 1.40

F1 - Processing parameters  
SI 1024  
MC2 QF  
SF 500.1400000 MHz  
WDW QSINE  
SSE 0  
LB 0 Hz  
GB 0

GROUP BM  
 BM-SBD-SD43 in CDCl3

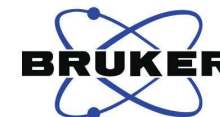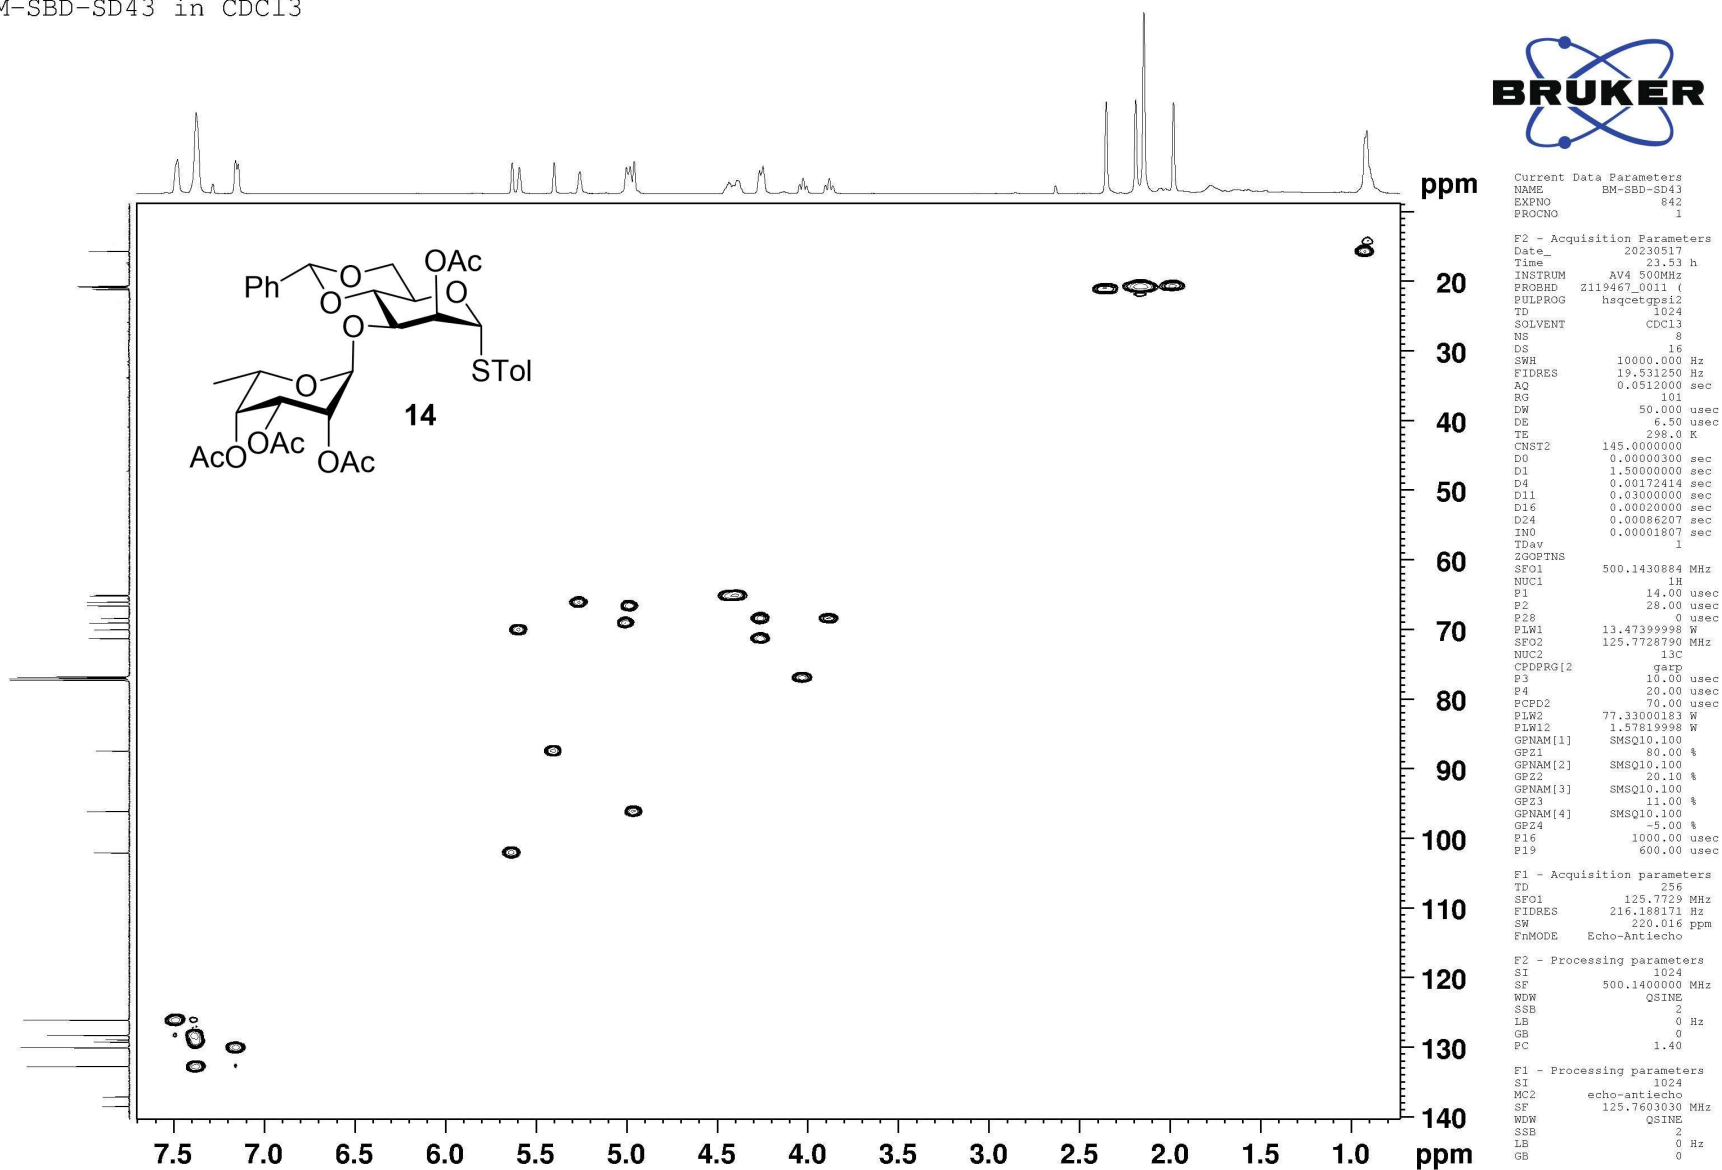

Current Data Parameters  
 NAME BM-SBD-SD43  
 EXPNO 842  
 PROCNO 1

F2 - Acquisition Parameters  
 Date\_ 20230517  
 Time 23.53 h  
 INSTRUM AV4 500MHz  
 PROBHD z119467\_0011 ( )  
 PULPROG hsqcetgps12  
 TD 1024  
 SOLVENT CDCl3  
 NS 8  
 DS 16  
 SWH 10000.000 Hz  
 FIDRES 19.531250 Hz  
 AQ 0.0512000 sec  
 RG 101  
 DW 50.000 usec  
 DE 6.50 usec  
 TE 298.0 K  
 CNST2 145.0000000  
 D0 0.00000300 sec  
 D1 1.50000000 sec  
 D4 0.00172414 sec  
 D11 0.03000000 sec  
 D16 0.00020000 sec  
 D24 0.00086207 sec  
 LNO 0.00001807 sec  
 TDAV 1  
 ZGOPTNS

SFO1 500.1430884 MHz  
 NUC1 1H  
 P1 14.00 usec  
 P2 28.00 usec  
 P28 0 usec  
 PLW1 13.47399998 W  
 SFO2 125.7728790 MHz  
 NUC2 13C  
 CPDPRG[2] garrp  
 P3 10.00 usec  
 P4 20.00 usec  
 PCPD2 70.00 usec  
 PLW2 77.33000183 W  
 PLW12 1.57819998 W  
 GPNAM[1] SMSQ10.100  
 GPZ1 80.00 %  
 GPNAM[2] SMSQ10.100  
 GPZ2 20.10 %  
 GPNAM[3] SMSQ10.100  
 GPZ3 11.00 %  
 GPNAM[4] SMSQ10.100  
 GPZ4 -5.00 %  
 P16 1000.00 usec  
 P19 600.00 usec

F1 - Acquisition parameters  
 TD 256  
 SFO1 125.7729 MHz  
 FIDRES 216.188171 Hz  
 SW 220.016 ppm  
 FnMODE Echo-Antiecho

F2 - Processing parameters  
 SI 1024  
 SF 500.1400000 MHz  
 WDW QSINE  
 SSB 2  
 LB 0 Hz  
 GB 0  
 PC 1.40

F1 - Processing parameters  
 SI 1024  
 MC2 echo-antiecho  
 SF 125.7603030 MHz  
 WDW QSINE  
 SSB 2  
 LB 0 Hz  
 GB 0

GROUP BM  
 BM-SBD-SD37 in CDCl3

7.3908  
 7.3745  
 7.2837  
 7.1628  
 7.1468

5.6220  
 5.6212

4.7524  
 4.7390  
 4.7256  
 4.7122  
 4.6725  
 4.6697  
 4.6602  
 4.6574  
 4.4955  
 4.4832

2.3475

1.4773  
 1.3976  
 1.3458  
 1.3323

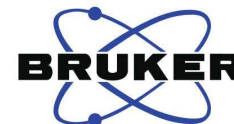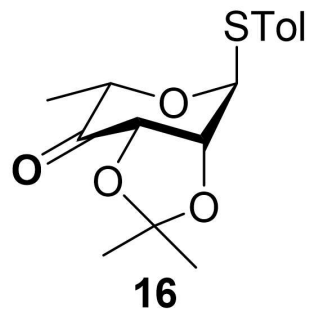

Current Data Parameters  
 NAME BM-SBD-SD37  
 EXPNO 60  
 PROCNO 1

F2 - Acquisition Parameters  
 Date\_ 20230410  
 Time 23.27 h  
 INSTRUM AV4 500MHz  
 PROBHD Z119467\_0011 ( )  
 PULPROG zg30  
 TD 65536  
 SOLVENT CDCl3  
 NS 16  
 DS 2  
 SWH 10000.000 Hz  
 FIDRES 0.305176 Hz  
 AQ 3.2767999 sec  
 RG 59.4286  
 DW 50.000 usec  
 DE 10.11 usec  
 TE 299.3 K  
 D1 1.00000000 sec  
 TD0 1  
 SFO1 500.1430884 MHz  
 NUCl 1H  
 P0 4.67 usec  
 PL 14.00 usec  
 PLW1 13.47399998 W

F2 - Processing parameters  
 SI 65536  
 SF 500.1400000 MHz  
 WDW EM  
 SSB 0  
 LB 0.30 Hz  
 GB 0  
 PC 1.00

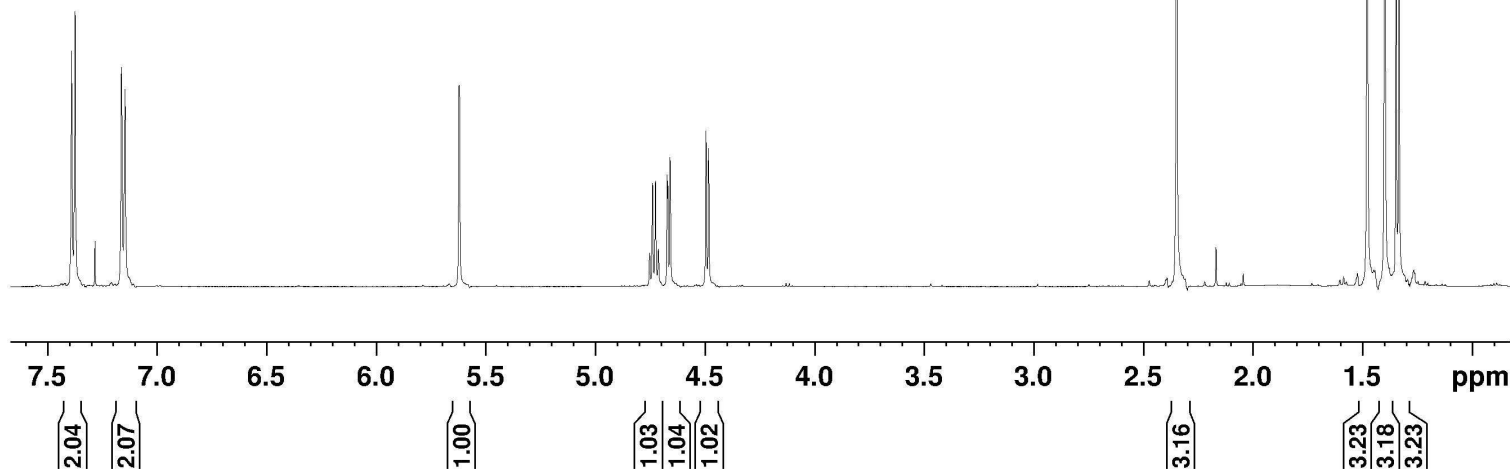



GROUP BM  
BM-SBD-SD37 in CDCl3

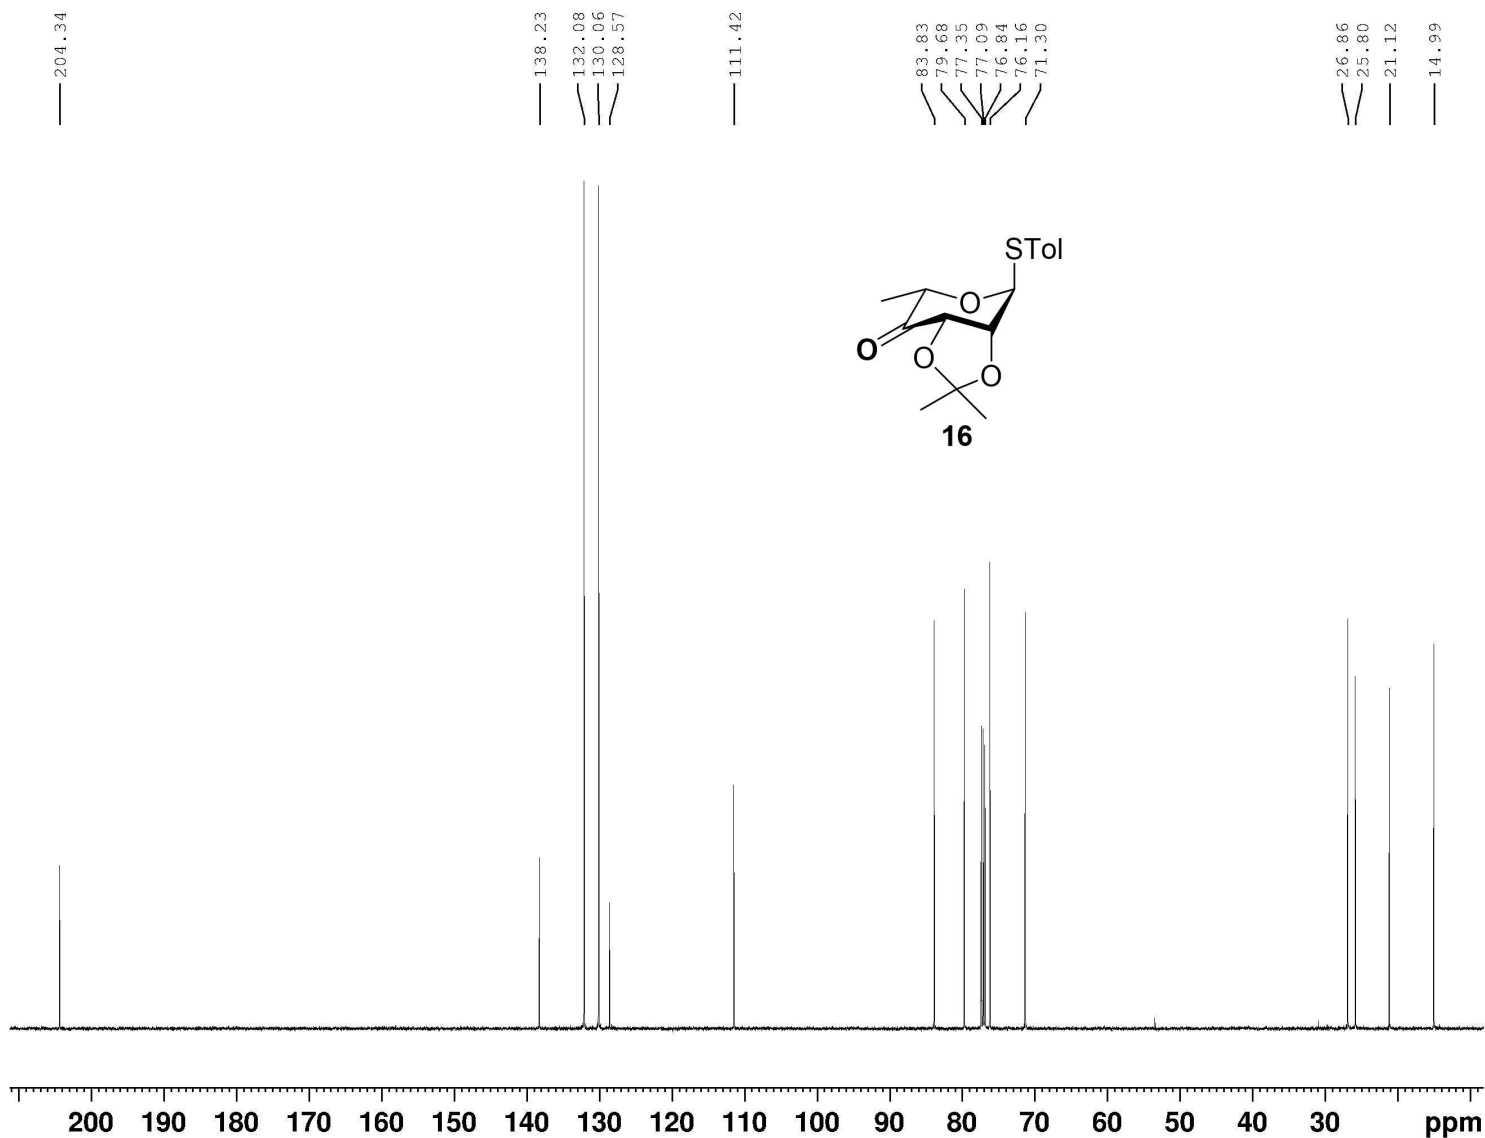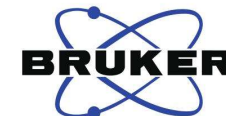

```
Current Data Parameters
NAME      BM-SBD-SD37
EXPNO     63
PROCNO    1

F2 - Acquisition Parameters
Date_     20230411
Time      1.28 h
INSTRUM   AV4 500MHz
PROBHD    z119467_0011 f
PULPROG   zgpg30
TD         65536
SOLVENT   CDCl3
NS         512
DS         4
SWH        30120.482 Hz
FIDRES     0.919204 Hz
AQ         1.0878977 sec
RG         301
DW         16.600 usec
DE         6.50 usec
TE         300.3 K
D1         2.0000000 sec
D11        0.0300000 sec
TDO        1
SFO1       125.7728791 MHz
NUC1       13C
PQ         3.33 usec
P1         10.00 usec
PLW1       77.33000183 W
SFO2       500.1420004 MHz
NUC2       1H
CPDPRG[2] waltz65
PCPD2      80.00 usec
PLW2       13.47399998 W
PLW12      0.41264001 W
PLW13      0.20756000 W

F2 - Processing parameters
SI         32768
SF         125.7603030 MHz
WDW        EM
SSB        0
LB         1.00 Hz
GB         0
PC         1.40
```

GROUP BM  
BM-SBD-SD37 in CDCl3

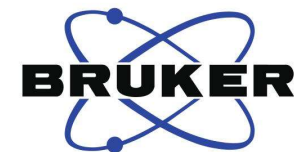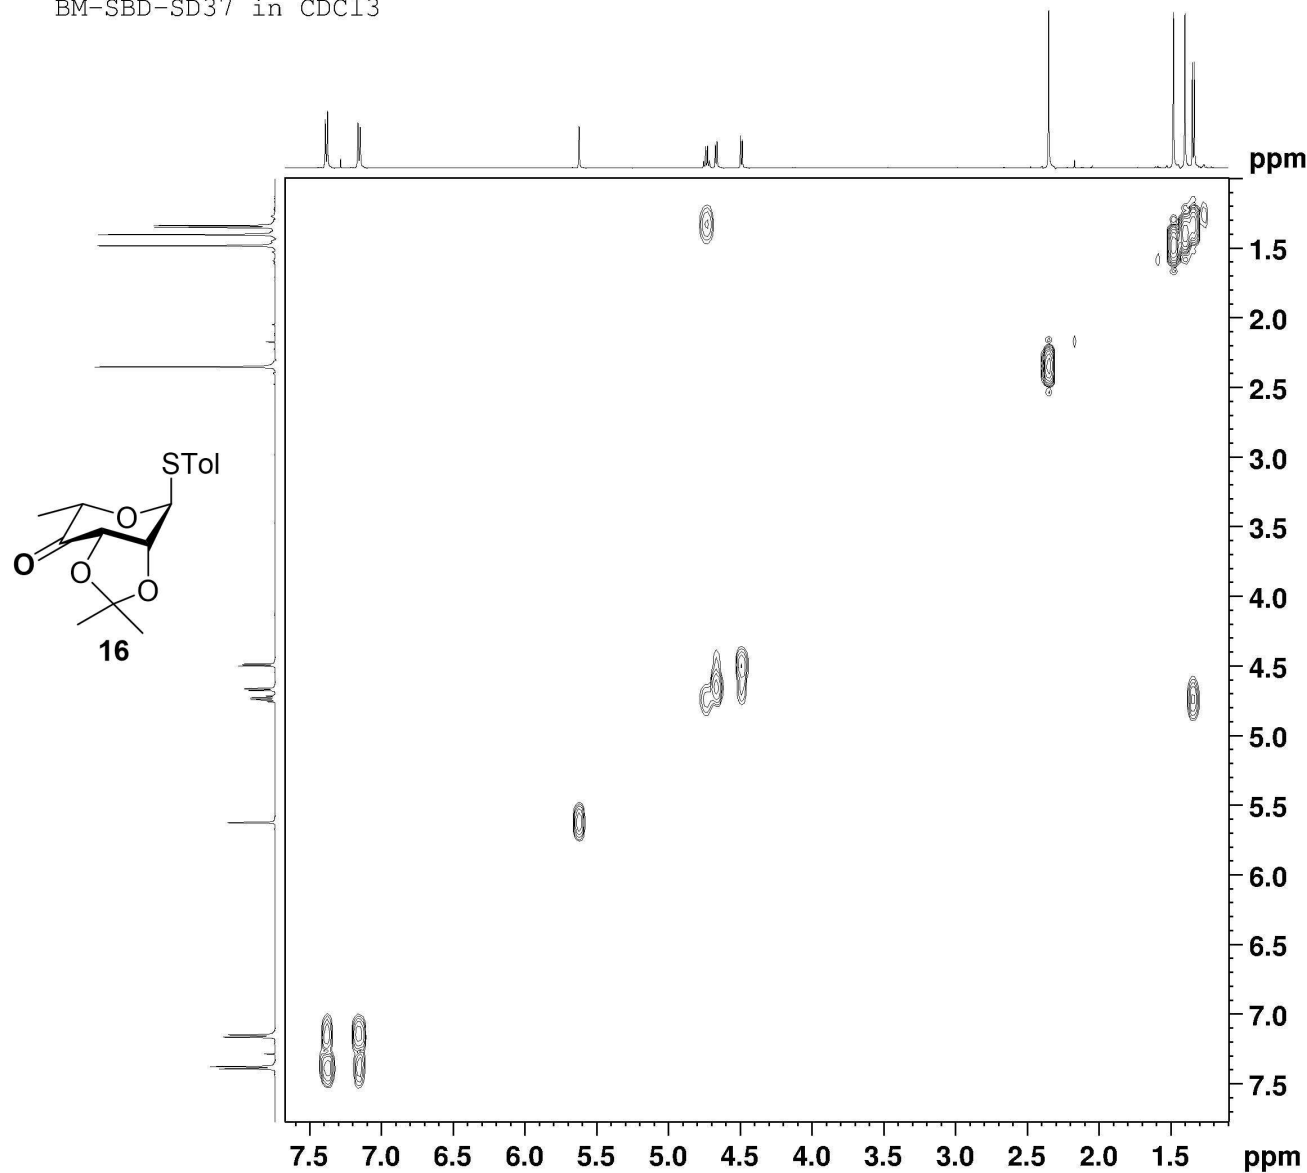

```
Current Data Parameters
NAME      BM-SBD-SD37
EXPNO     61
PROCNO    1

F2 - Acquisition Parameters
Date_     20230411
Time      0.05 h
INSTRUM   AV4 500MHz
PROBHD    Z119467_001L (
PULPROG   cosygpppqf
TD         2048
SOLVENT   CDCl3
NS         8
DS         16
SWH        10000.000 Hz
FIDRES     9.765625 Hz
AQ         0.1024000 sec
RG         64
DW         50.000 usec
DE         6.500 usec
TE         299.2 K
D0         0.00000300 sec
D1         2.00000000 sec
D11        0.03000000 sec
D12        0.00002000 sec
D13        0.00000400 sec
D16        0.00020000 sec
IN0        0.00009997 sec
TDav       1
SF01       500.1425007 MHz
NUC1       1H
P0         14.00 usec
P1         14.00 usec
P17        2500.00 usec
PLW1       13.47399998 W
PLW10      2.93440008 W
GPNAM[1]   SMSQ10.100
GP21       10.00 %
P16        1000.00 usec

F1 - Acquisition parameters
TD         128
SF01       500.1425 MHz
FIDRES     156.289078 Hz
SW         19.999 ppm
FnMODE     QF

F2 - Processing parameters
SI         1024
SF         500.1400000 MHz
WDW        QSINE
SSB        0
LB         0 Hz
GB         0
PC         1.40

F1 - Processing parameters
SI         1024
MC2        QF
SF         500.1400000 MHz
WDW        QSINE
SSB        0
LB         0 Hz
GB         0
```

GROUP BM  
 BM-SBD-SD37 in CDCl3

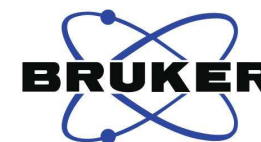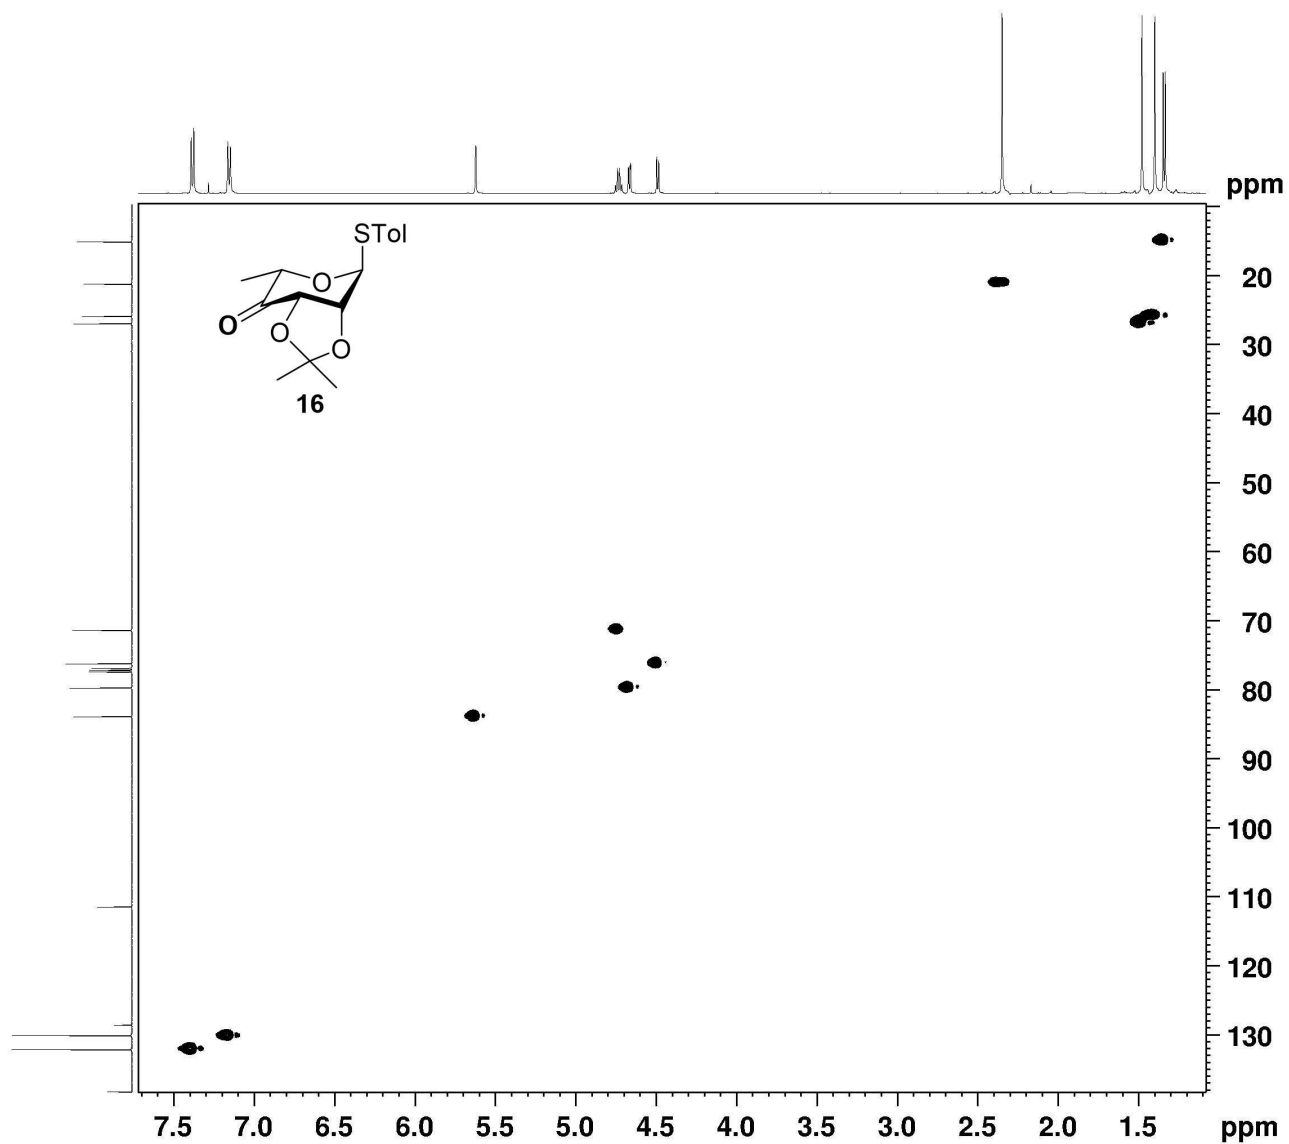

```

Current Data Parameters
NAME      BM-SBD-SD37
EXPNO     62
PROCNO    1

F2 - Acquisition Parameters
Date_     20230411
Time      1.00 h
INSTRUM   AV4 500MHz
PROBHD    Z119467.0011 4
PULPROG   hsqcetgps42
TD         1024
SOLVENT   CDCl3
NS         8
DS         16
SWH        10000.000 Hz
FIDRES     19.531250 Hz
AQ         0.0512000 sec
RG         101
DW         50.000 usec
DE         6.50 usec
TE         299.3 K
CNST2     145.0000000
D0         0.00000300 sec
D1         1.50000000 sec
D4         0.00172414 sec
D11        0.03000000 sec
D16        0.00020000 sec
D24        0.00086207 sec
IMD        0.00001590 sec
TDav       1
ZGOPTINS
SFO1       500.1425007 MHz
NUC1       1H
P1         14.00 usec
P2         28.00 usec
P8         0 usec
PLW1       13.47399998 W
SFO2       125.7728790 MHz
NUC2       13C
CPDPRG[2]  garrp
F3         10.00 usec
P4         20.00 usec
PCPD2     70.00 usec
PLW2       77.33000183 W
PLW12     1.57819998 W
GPNAM[1]   SMSQ10.100
GPZ1       80.00 %
GPNAM[2]   SMSQ10.100
GPZ2       20.10 %
GPNAM[3]   SMSQ10.100
GPZ3       11.00 %
GPNAM[4]   SMSQ10.100
GPZ4       5.00 %
P16        1000.00 usec
P19        600.00 usec

F1 - Acquisition parameters
TD         256
SFO1       125.7729 MHz
FIDRES     245.676102 Hz
SW         250.026 ppm
F1MODE     Echo-Antiecho

F2 - Processing parameters
SI         1024
SF         500.1400000 MHz
WDW        QSINE
SSB        2
LB         0 Hz
GB         0
PC         1.40

F1 - Processing parameters
SI         1024
MC2        echo-antiecho
SF         125.7603030 MHz
WDW        QSINE
SSB        2
LB         0 Hz
GB         0
  
```

GROUP BM  
 BM-SBD-SD38 1H in CDCl3

7.4189  
 7.4029  
 7.2837  
 7.1602  
 7.1444

5.6776  
 5.6740

4.2824  
 4.2702  
 4.2607  
 4.2511  
 4.2375  
 4.2259  
 4.2175  
 3.6863  
 3.6756  
 3.6649

2.3584  
 2.2139  
 2.2004

1.6110  
 1.4168  
 1.3093  
 1.2964

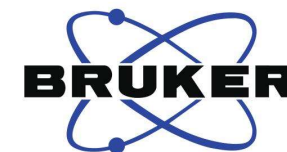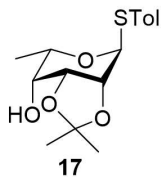

```

Current Data Parameters
NAME      BM-SBD.SD38
EXPNO     460
PROCNO    1

F2 - Acquisition Parameters
Date_     20230415
Time      15.06
INSTRUM   Bruker_default_av500
PROBHD    5 mm PABBO BB/
PULPROG   zg30
TD         32768
SOLVENT   CDCl3
NS         16
DS         2
SWH        10000.000 Hz
FIDRES     0.305176 Hz
AQ         1.6384000 sec
RG         22.6
DW         50.000 usec
DE         6.50 usec
TE         273.5 K
D1         1.00000000 sec
TD0        1

===== CHANNEL f1 =====
SFO1      500.4525023 MHz
NUC1       1H
P1         21.50 usec
PLW1      18.00000000 W

F2 - Processing parameters
SI         16384
SF         500.4500000 MHz
WDW        EM
SSB        0
LB         0.30 Hz
GB         0
PC         10.10
  
```

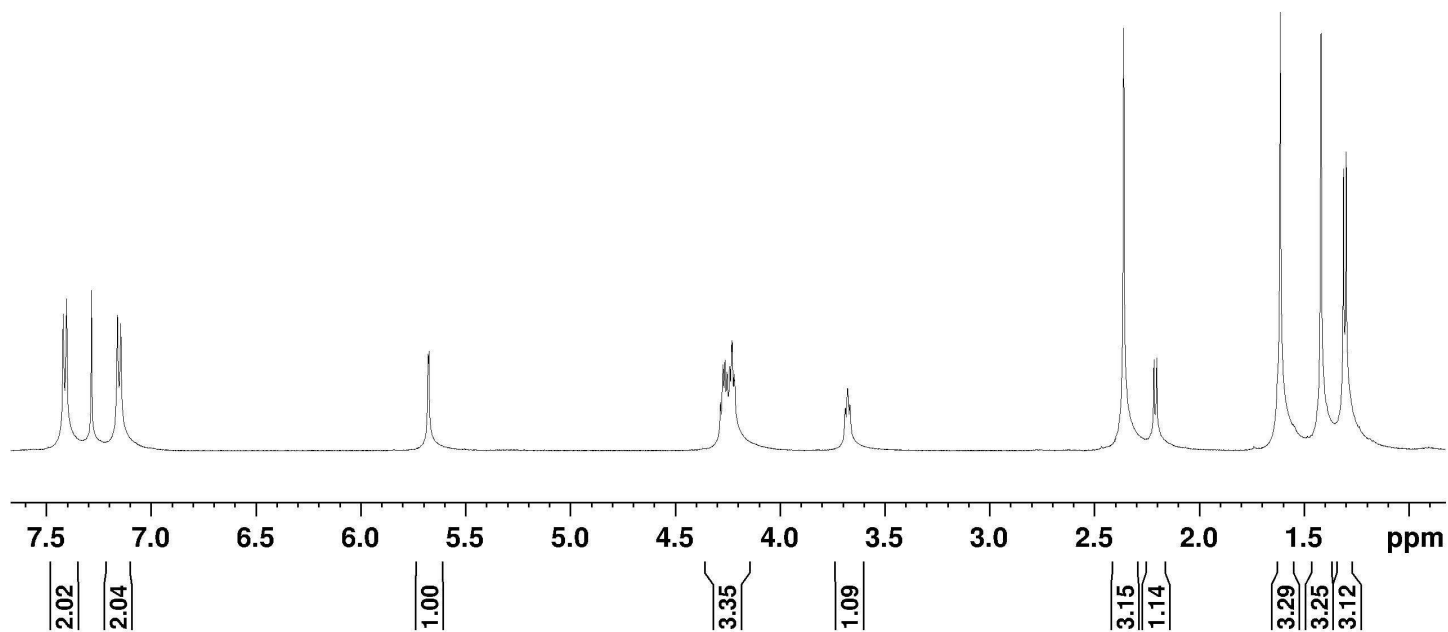

GROUP BM  
BM-SBD-SD38 13C in CDCl3

137.90  
132.53  
129.77  
129.53  
109.51

83.74  
77.26  
77.01  
76.76  
73.62  
73.32  
67.67  
66.46

25.95  
25.37  
21.12  
16.55

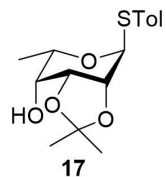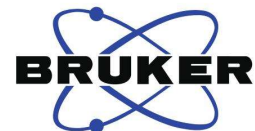

Current Data Parameters  
NAME BM-SBD.SD38  
EXPNO 461  
PROCNO 1

F2 - Acquisition Parameters  
Date\_ 20230415  
Time 15.14  
INSTRUM Bruker\_default\_av500  
PROBHD 5 mm FAEBQ BB/  
PULPROG zgpg30  
TD 65536  
SOLVENT cdcl3  
NS 512  
DS 4  
SWH 29761.904 Hz  
FIDRES 0.454131 Hz  
AQ 1.1010048 sec  
RG 25.4  
DW 16.800 usec  
DE 6.50 usec  
TE 273.5 K  
D1 2.00000000 sec  
D11 0.03000000 sec  
TD0 1

===== CHANNEL f1 =====  
SFO1 125.8508362 MHz  
NUC1 13C  
P1 10.70 usec  
PLW1 75.00000000 W

===== CHANNEL f2 =====  
SFO2 500.4520018 MHz  
NUC2 1H  
CPDPRG2 waltz16  
PCPD2 80.00 usec  
PLW2 18.00000000 W  
PLW12 1.30009997 W  
PLW13 0.65393001 W

F2 - Processing parameters  
SI 32768  
SF 125.8382526 MHz  
WDW EM  
SSB 0  
LB 2.00 Hz  
GB 0  
FC 1.40

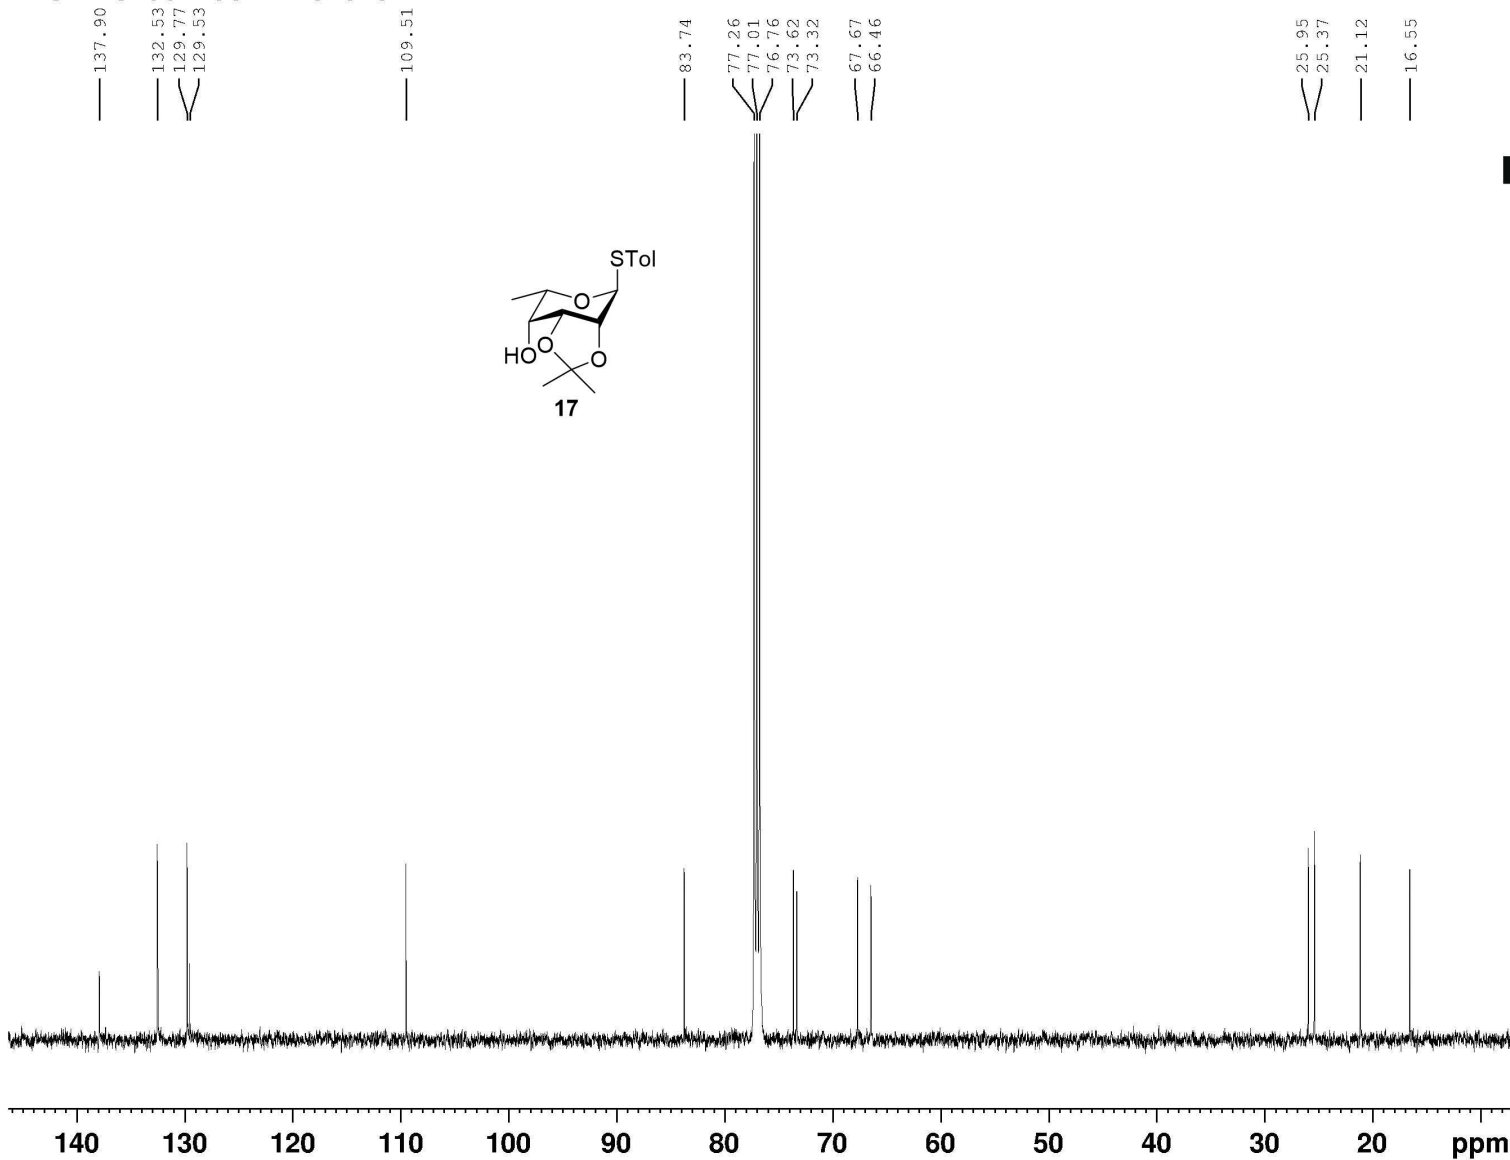

GROUP BM  
BM-BED-AN14 in CDCl3

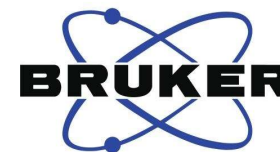

7.4005  
7.3848  
7.1402  
7.1245

5.6414  
5.1703  
5.1599  
4.4169  
4.4052  
4.3935  
4.3687  
4.3561  
4.3432  
4.3319  
4.2164  
4.2134  
4.2039  
4.2010

2.3416  
2.1681

1.5194  
1.3659  
1.1732  
1.1601

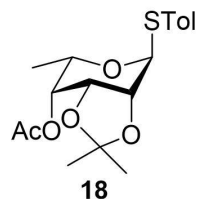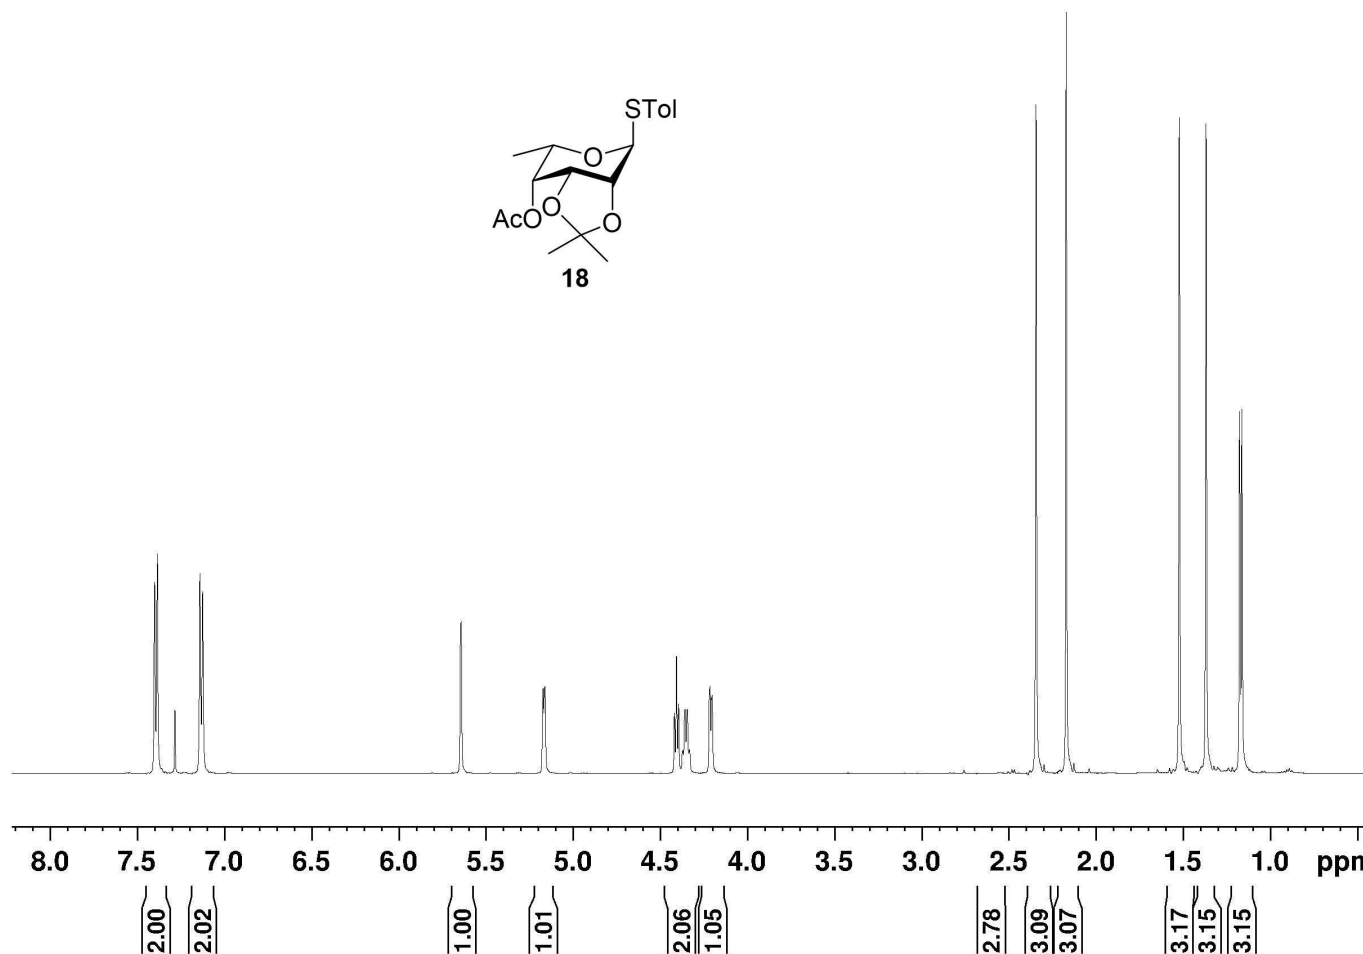

Current Data Parameters  
NAME Subrata  
EXPNO 950  
PROCNO 1

F2 - Acquisition Parameters  
Date\_ 20230419  
Time 5.35 h  
INSTRUM AV4 500MHZ  
PROBHD Z119467\_0011 (   
PULPROG zg30  
TD 65536  
SOLVENT CDCl3  
NS 16  
DS 2  
SWH 10000.000 Hz  
FIDRES 0.305176 Hz  
AQ 3.2767999 sec  
RG 101  
DW 50.000 usec  
DE 10.11 usec  
TE 300.0 K  
D1 1.00000000 sec  
TD0 1  
SFO1 500.1430884 MHz  
NUC1 1H  
P0 4.67 usec  
P1 14.00 usec  
PLW1 13.47399998 W

F2 - Processing parameters  
SI 65536  
SF 500.1400000 MHz  
WDW EM  
SSB 0  
LB 0.30 Hz  
GB 0  
PC 1.00

GROUP BM  
BM-BED-AN14 in CDCl3

170.48

137.85

132.34

129.77

129.38

109.83

83.59

77.32

77.06

76.81

73.28

71.37

67.77

65.29

26.25

25.35

21.15

21.11

16.28

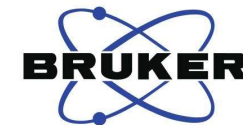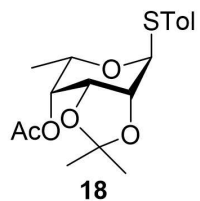

Current Data Parameters  
NAME Subrata  
EXPNO 953  
PROCNO 1

F2 - Acquisition Parameters  
Date\_ 20230419  
Time 9.33 h  
INSTRUM AV4 500MHz  
PROBHD Z119467\_0011 (  
PULPROG zgpg30  
TD 65536  
SOLVENT CDCl3  
NS 1024  
DS 4  
SWH 30120.482 Hz  
FIDRES 0.919204 Hz  
AQ 1.0878977 sec  
RG 101  
DW 16.600 usec  
DE 6.50 usec  
TE 300.8 K  
D1 2.0000000 sec  
D11 0.0300000 sec  
TD0 1  
SFO1 125.7728791 MHz  
NUC1 13C  
P0 3.33 usec  
P1 10.00 usec  
PLW1 77.33000183 W  
SFO2 500.1420006 MHz  
NUC2 1H  
CPDPRG[2] waltz65  
PCPD2 80.00 usec  
PLW2 13.47399998 W  
PLW12 0.41264001 W  
PLW13 0.20756000 W

F2 - Processing parameters  
SI 32768  
SF 125.7603030 MHz  
WDW EM  
SSB 0  
LB 1.00 Hz  
GB 0  
PC 1.40

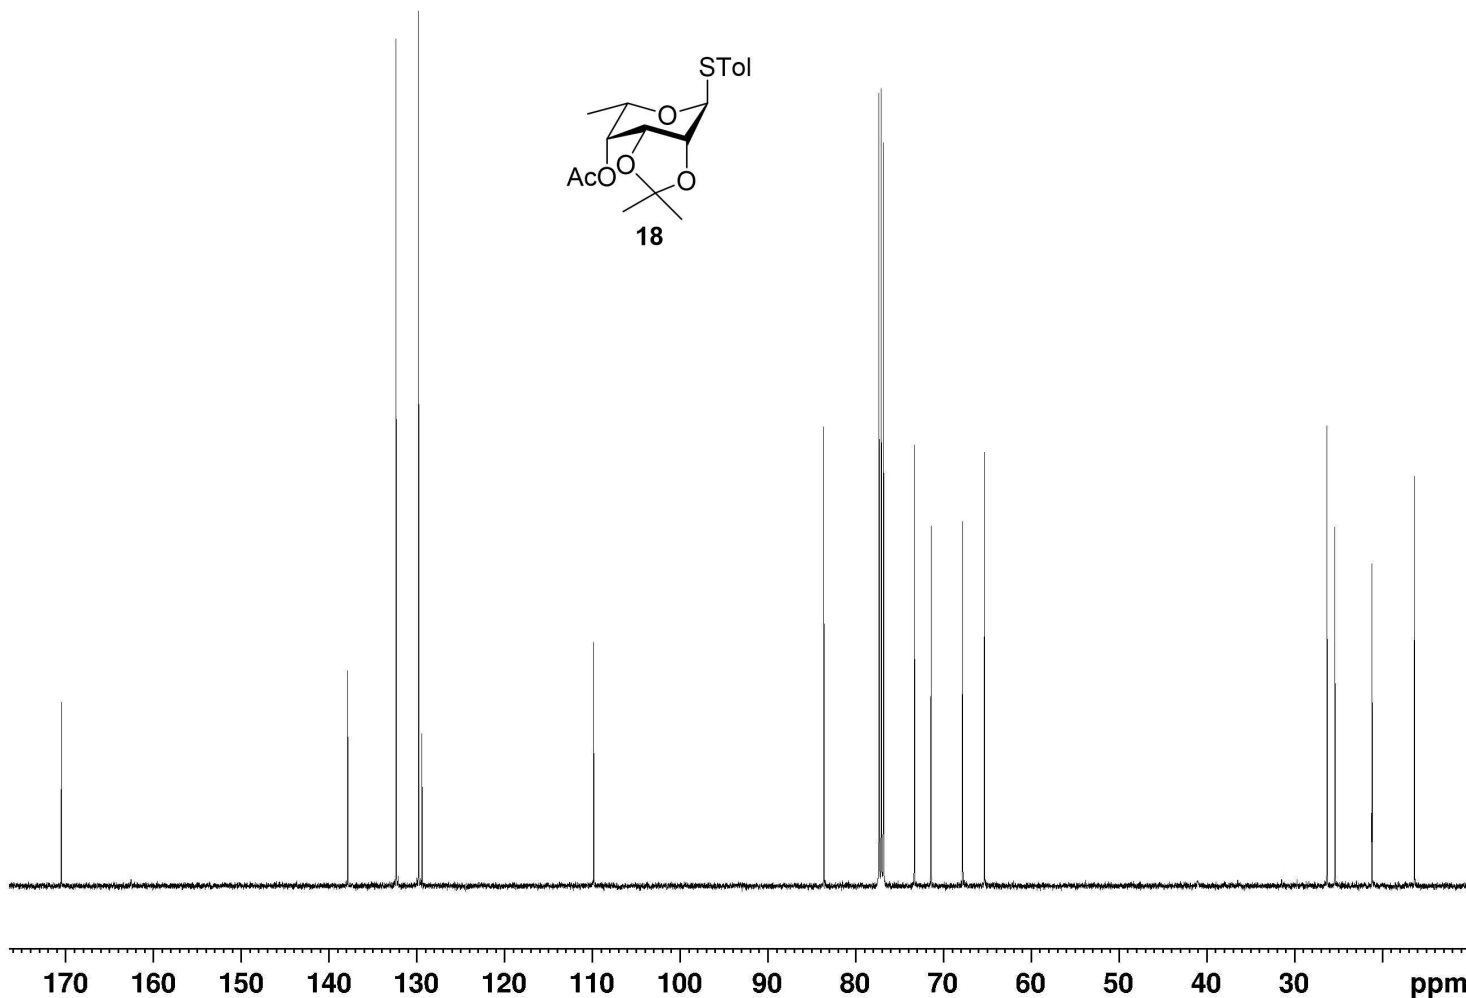

GROUP BM  
BM-BED-AN14 in CDCl3

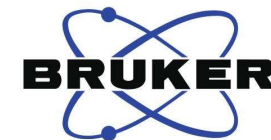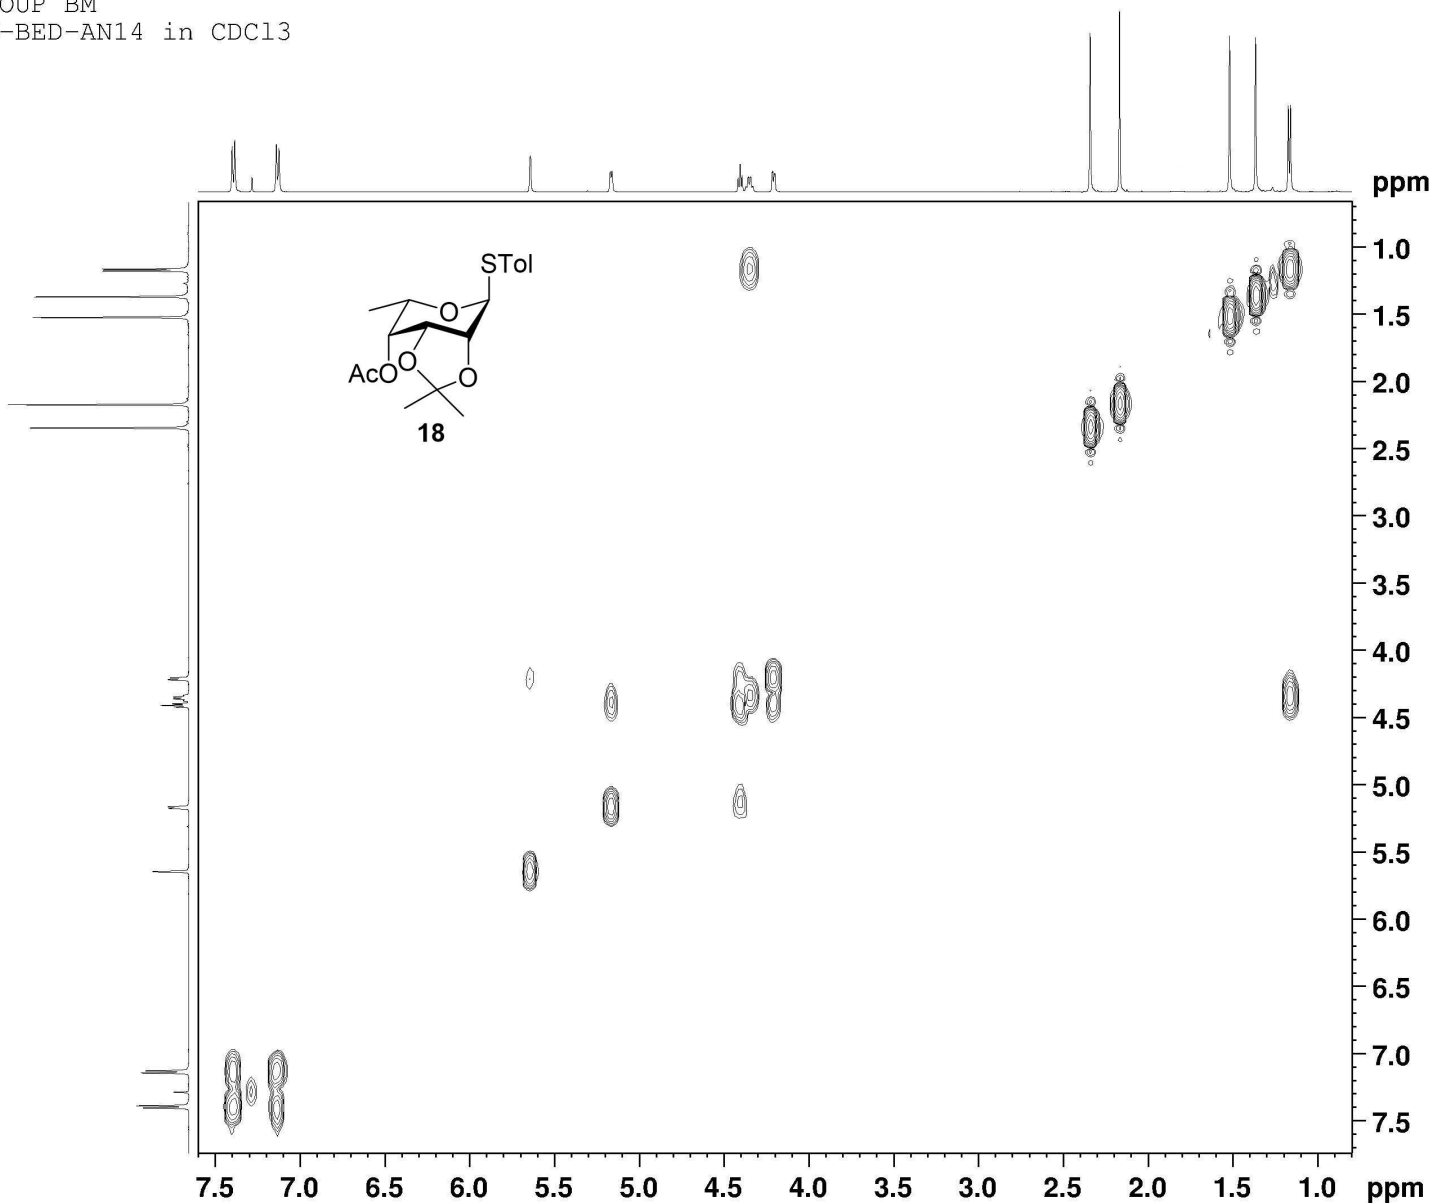

Current Data Parameters  
NAME Subrata  
EXPNO 951  
PROCNO 1

F2 - Acquisition Parameters  
Date\_ 20230419  
Time 6.49 h  
INSTRUM Av4 500MHz  
PROBHD Z119467\_0011 ( )  
PULPROG cosygpppqf  
TD 2048  
SOLVENT CDCl3  
NS 16  
DS 16  
SWH 10000.000 Hz  
FIDRES 9.765625 Hz  
AQ 0.1024000 sec  
RG 64  
DW 50.000 usec  
DE 6.50 usec  
TE 300.0 K  
D0 0.00000300 sec  
D1 2.00000000 sec  
D11 0.03000000 sec  
D12 0.00002000 sec  
D13 0.00000400 sec  
D16 0.00020000 sec  
IN0 0.00009997 sec  
TDav 1  
SFO1 500.1425007 MHz  
NUC1 1H  
P0 14.00 usec  
P1 14.00 usec  
P17 2500.00 usec  
PLW1 13.47399998 W  
PLW10 2.93440008 W  
GNAM[1] SMSQ10.100  
GPZ1 10.00 %  
P16 1000.00 usec

F1 - Acquisition parameters  
TD 128  
SFO1 500.1425 MHz  
FIDRES 156.289078 Hz  
SW 19.999 ppm  
FnMODE QF

F2 - Processing parameters  
SI 1024  
SF 500.1400000 MHz  
WDW QSINE  
SSB 0  
LB 0 Hz  
GB 0  
PC 1.40

F1 - Processing parameters  
SI 1024  
MC2 QF  
SF 500.1400000 MHz  
WDW QSINE  
SSB 0  
LB 0 Hz  
GB 0



GROUP BM  
 BM-BED-AN14 in CDCl3

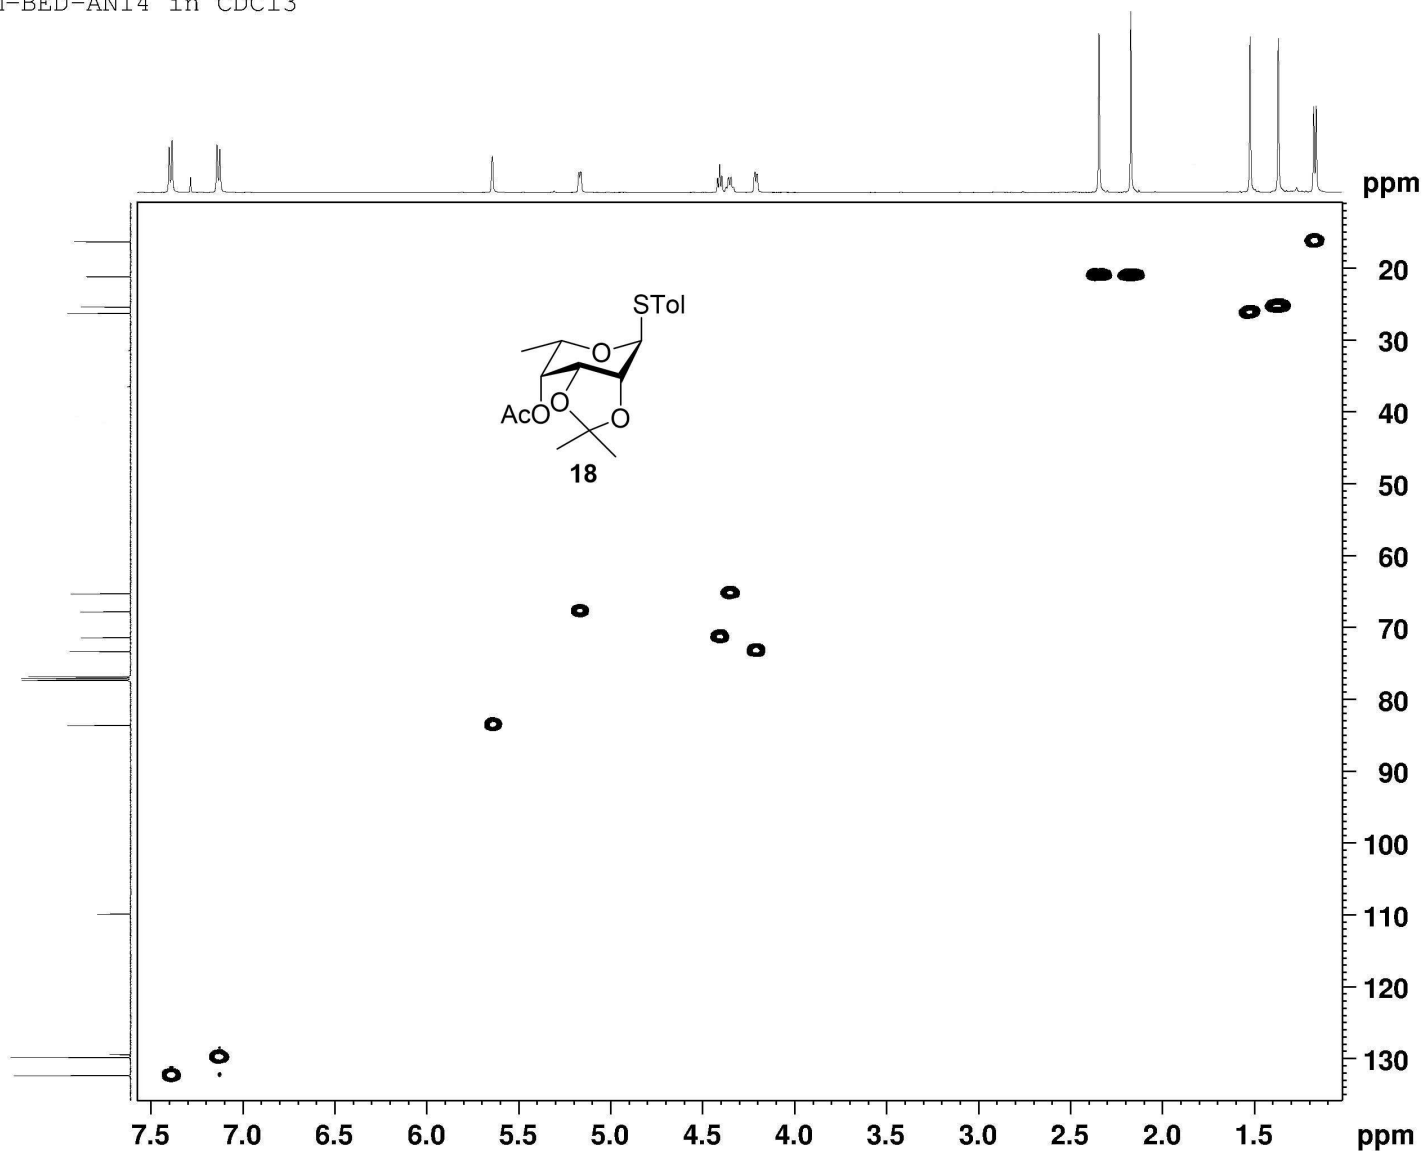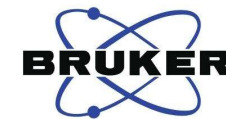

```

Current Data Parameters
NAME      Subrata
EXNO     952
PROCNO    1

F2 - Acquisition Parameters
Date_    20230419
Time     8.38 h
INSTRUM  AV4 500MHz
PROBHD   Z119467_0011 (
PULPROG  hsqcetgps12
TD        1024
SOLVENT  CDCl3
NS        16
DS        16
SWH       10000.000 Hz
FIDRES    19.531250 Hz
AQ         0.0512000 sec
RG         101
DW         50.000 usec
DE         6.50 usec
TE        299.8 K
CNST2     145.0000000
D0         0.0000000 sec
D1         1.8000000 sec
D4         0.00172414 sec
D11        0.0300000 sec
D14        0.0002000 sec
D24        0.0008207 sec
IN0        0.00001590 sec
TD0av      1
ZGPTNS
SF01       500.1425007 MHz
NUC1       1H
P1         14.00 usec
P2         28.00 usec
P28        0 usec
PLW1       13.47399998 W
SF02       125.7728790 MHz
NUC2       13C
CPDPRG2    garrp
P3         10.00 usec
P4         20.00 usec
PCED2      70.00 usec
PLW2       77.33000183 W
PLW12      1.57819998 W
GFNAM[1]   SMSQ10.100
GP21       80.00 %
<GFNAM[2]  SMSQ10.100
GP22       20.10 %
GFNAM[3]   SMSQ10.100
<GP23     11.00 %
GFNAM[4]   SMSQ10.100
GP24       -5.00 %
P16        1000.00 usec
P19        600.00 usec

F1 - Acquisition parameters
TD         256
SF01       125.7729 MHz
FIDRES     245.676102 Hz
SW         250.026 FPM
F1MODE     Echo-Antiecho

F2 - Processing parameters
SI         1024
SF         500.1400000 MHz
WDW        QSINE
SSB        2
LB         0 Hz
GB         0
PC         1.40

F1 - Processing parameters
SI         1024
MC2        echo-antiecho
SF         125.7663030 MHz
WDW        QSINE
SSB        2
LB         0 Hz
GB         0
  
```

GROUP BM  
BM-SBD-SD42 in CDCl3

7.3751  
7.3599  
7.2835  
7.1459  
7.1311

5.4924  
5.3374  
5.2956  
5.2319

4.6438  
4.6321

2.3437  
2.1743  
2.1458  
2.0241

1.6983

1.2335  
1.2213

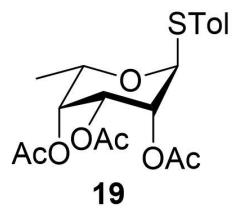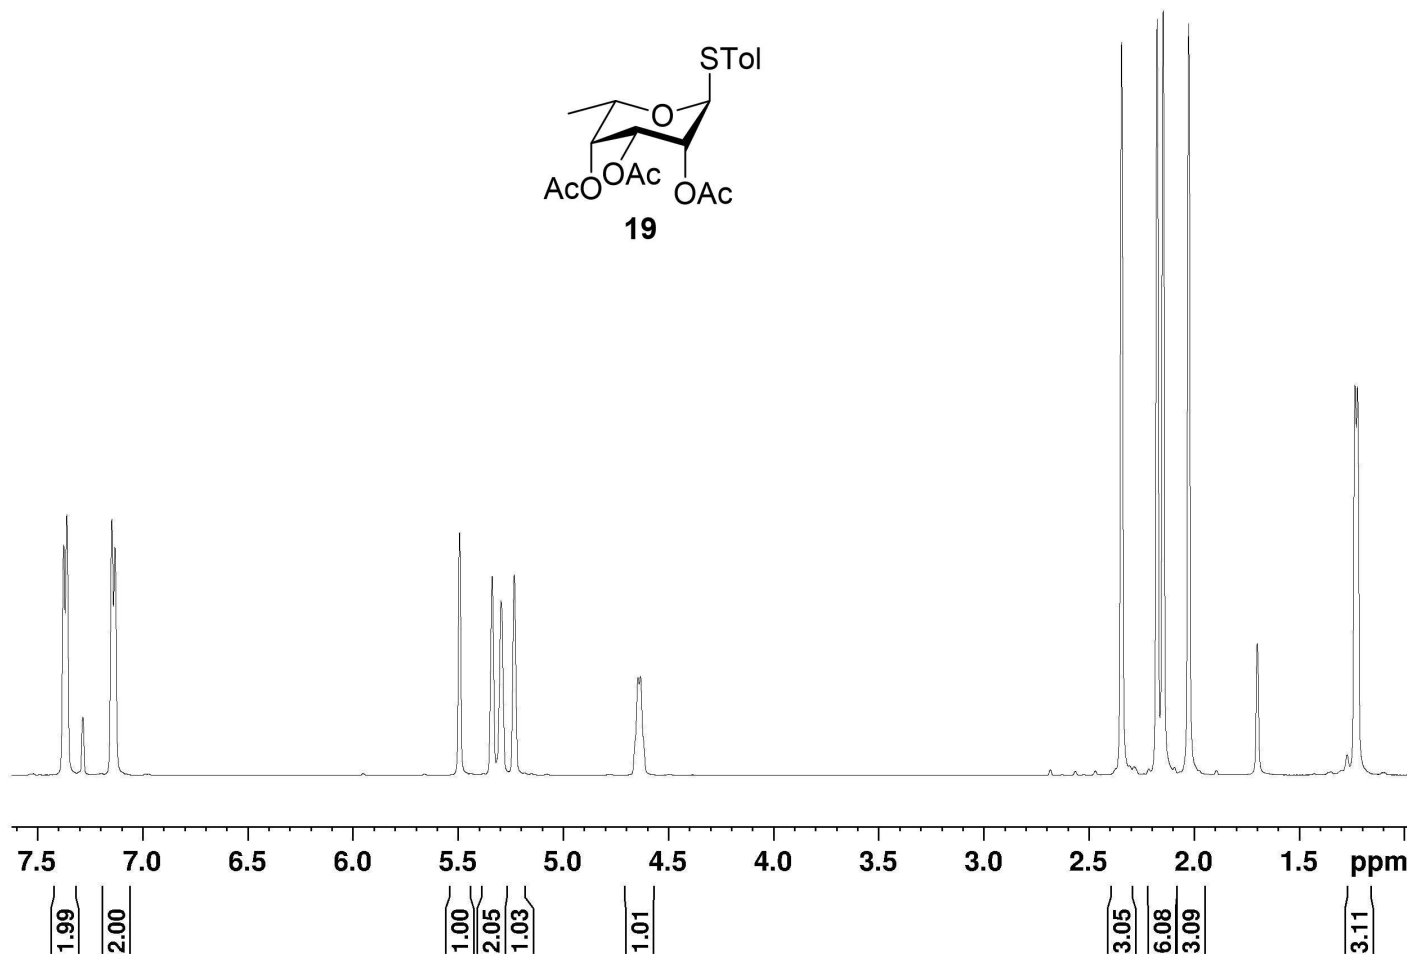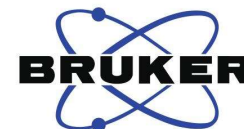

Current Data Parameters  
NAME BM-SBD-SD42  
EXPNO 850  
PROCNO 1

F2 - Acquisition Parameters  
Date\_ 20230518  
Time 0.53 h  
INSTRUM AV4 500MHz  
PROBHD Z119467\_0011 {  
PULPROG zg30  
TD 65536  
SOLVENT CDC13  
NS 16  
DS 2  
SWH 10000.000 Hz  
FIDRES 0.305176 Hz  
AQ 3.2767999 sec  
RG 101  
DW 50.000 usec  
DE 10.11 usec  
TE 298.0 K  
D1 1.0000000 sec  
TD0 1  
SFO1 500.1430884 MHz  
NUC1 1H  
P0 4.67 usec  
P1 14.00 usec  
PLW1 13.47399998 W

F2 - Processing parameters  
SI 65536  
SF 500.1400000 MHz  
WDW EM  
SSB 0  
LB 0.30 Hz  
GB 0  
PC 1.00

GROUP BM  
BM-SBD-SD42 in CDCl3

170.51  
169.96  
169.58

138.05  
132.14  
129.93  
129.34

86.45

77.31  
77.05  
76.80  
68.98  
68.63  
66.51  
66.21

21.11  
20.95  
20.68  
20.62  
16.10

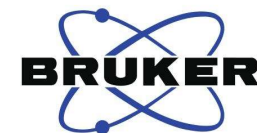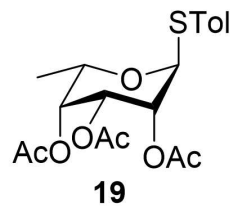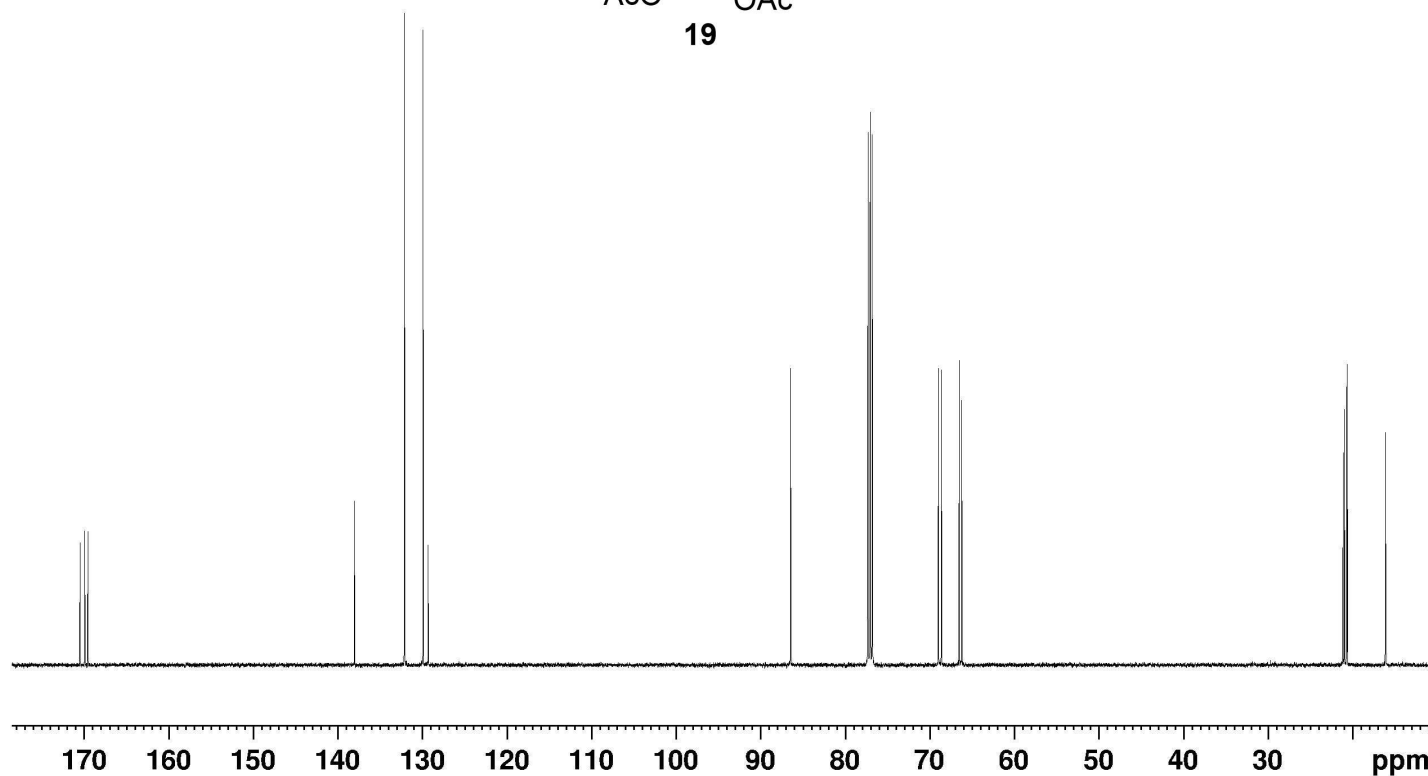

Current Data Parameters  
NAME BM-SBD-SD42  
EXPNO 853  
PROCNO 1

F2 - Acquisition Parameters  
Date\_ 20230518  
Time 3.02 h  
INSTRUM AV4 500MHz  
PROBHD Z119467\_0011 (  
PULPROG zgpg30  
TD 65536  
SOLVENT CDCl3  
NS 1024  
DS 4  
SWH 30120.482 Hz  
FIDRES 0.919204 Hz  
AQ 1.0878977 sec  
RG 101  
DW 16.600 usec  
DE 6.50 usec  
TE 298.8 K  
D1 2.0000000 sec  
D11 0.0300000 sec  
TD0 1  
SFO1 125.7728791 MHz  
NUC1 13C  
P0 3.33 usec  
P1 10.00 usec  
PLW1 77.33000183 W  
SFO2 500.1420006 MHz  
NUC2 1H  
CPDPRG[2] waltz65  
PCPD2 80.00 usec  
PLW2 13.47399998 W  
PLW12 0.41264001 W  
PLW13 0.20756000 W

F2 - Processing parameters  
SI 32768  
SF 125.7603030 MHz  
WDW EM  
SSB 0  
LB 1.00 Hz  
GB 0  
PC 1.40

GROUP BM  
BM-SBD-SD42 in CDCl3

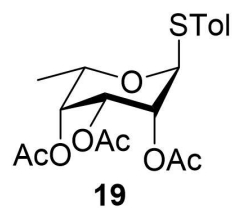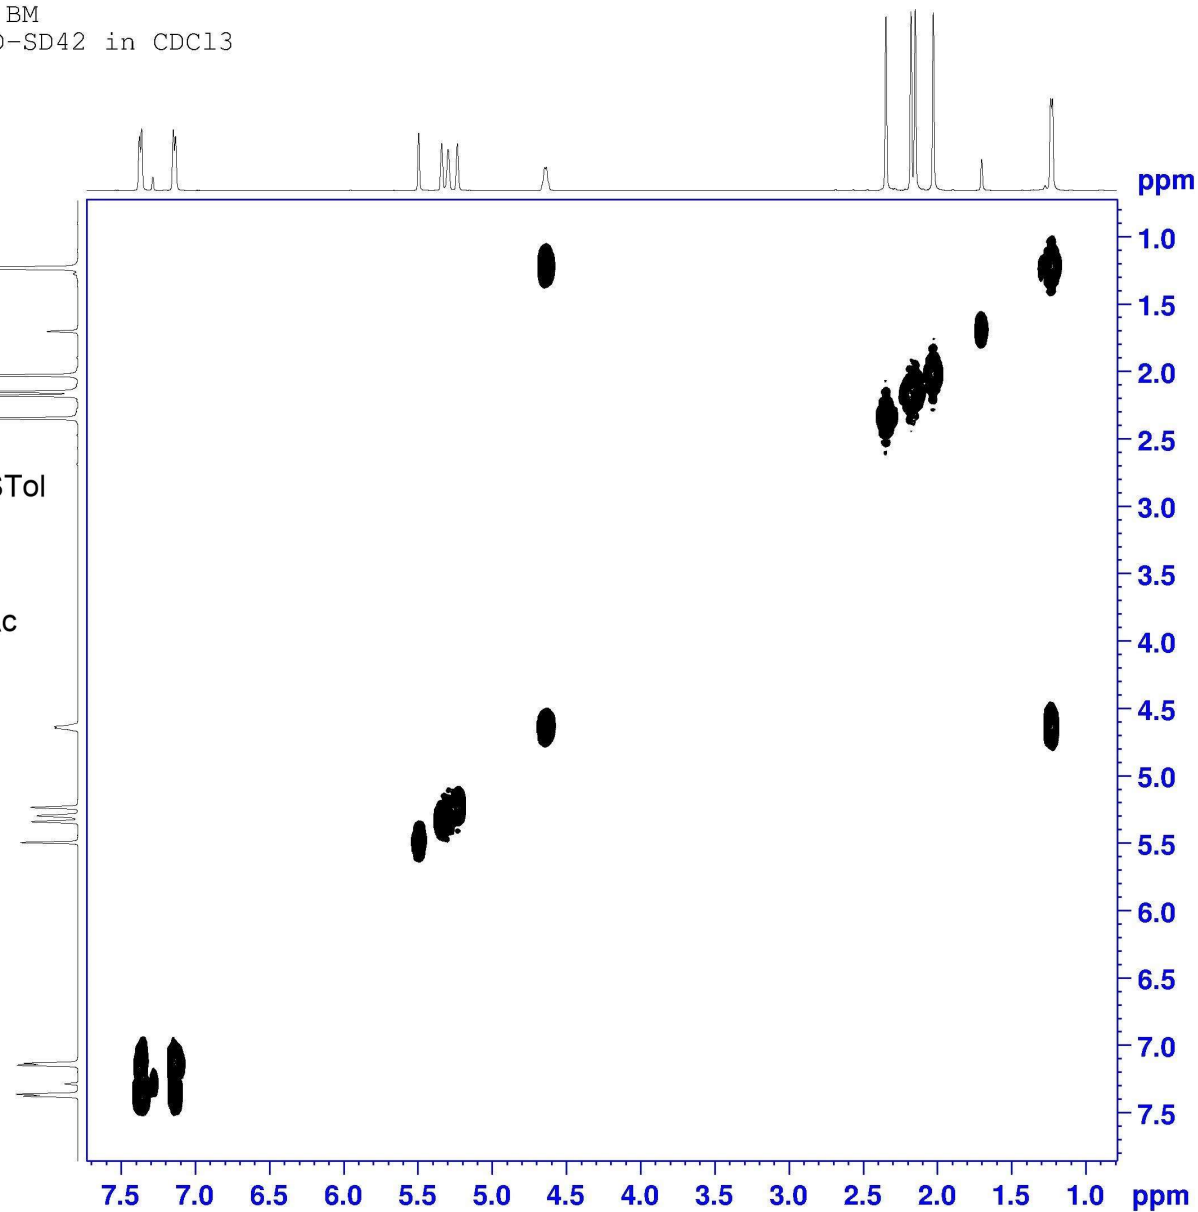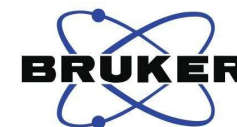

```
Current Data Parameters
NAME      BM-SBD-SD42
EXPNO     851
PROCNO    1

F2 - Acquisition Parameters
Date_     20230518
Time      1.13 h
INSTRUM   AV4 500MHz
PROBHD    Z119467_0011 /
PULPROG   cosygpgpgf
TD         2048
SOLVENT   CDCl3
NS         4
DS         16
SWH        10000.000 Hz
FIDRES     9.765625 Hz
AQ          0.1024000 sec
RG          64
DW          50.000 usec
DE          6.50 usec
TE          298.0 K
D0          0.00000300 sec
D1          2.00000000 sec
D11         0.03000000 sec
D12         0.00002000 sec
D13         0.00000400 sec
D16         0.00020000 sec
IN0         0.00009997 sec
TDav        1
SF01        500.1430008 MHz
NUC1         1H
P0           14.00 usec
P1           14.00 usec
P17          2500.00 usec
PLW1        13.47399998 W
PLW10       2.93440008 W
GPNAM[1]    SMSQ10.100
GPZ1         10.00 %
P16          1000.00 usec

F1 - Acquisition parameters
TD          128
SF01        500.143 MHz
FIDRES      156.289078 Hz
SW           19.999 ppm
FHM0MODE    QF

F2 - Processing parameters
SI           1024
SF           500.1400000 MHz
WDW          QSINE
SSB           0
LB            0 Hz
GB            0
PC            1.40

F1 - Processing parameters
SI           1024
MC2          QF
SF           500.1400000 MHz
WDW          QSINE
SSB           0
LB            0 Hz
GB            0
```

GROUP BM  
 BM-SBD-SD42 in CDCl3

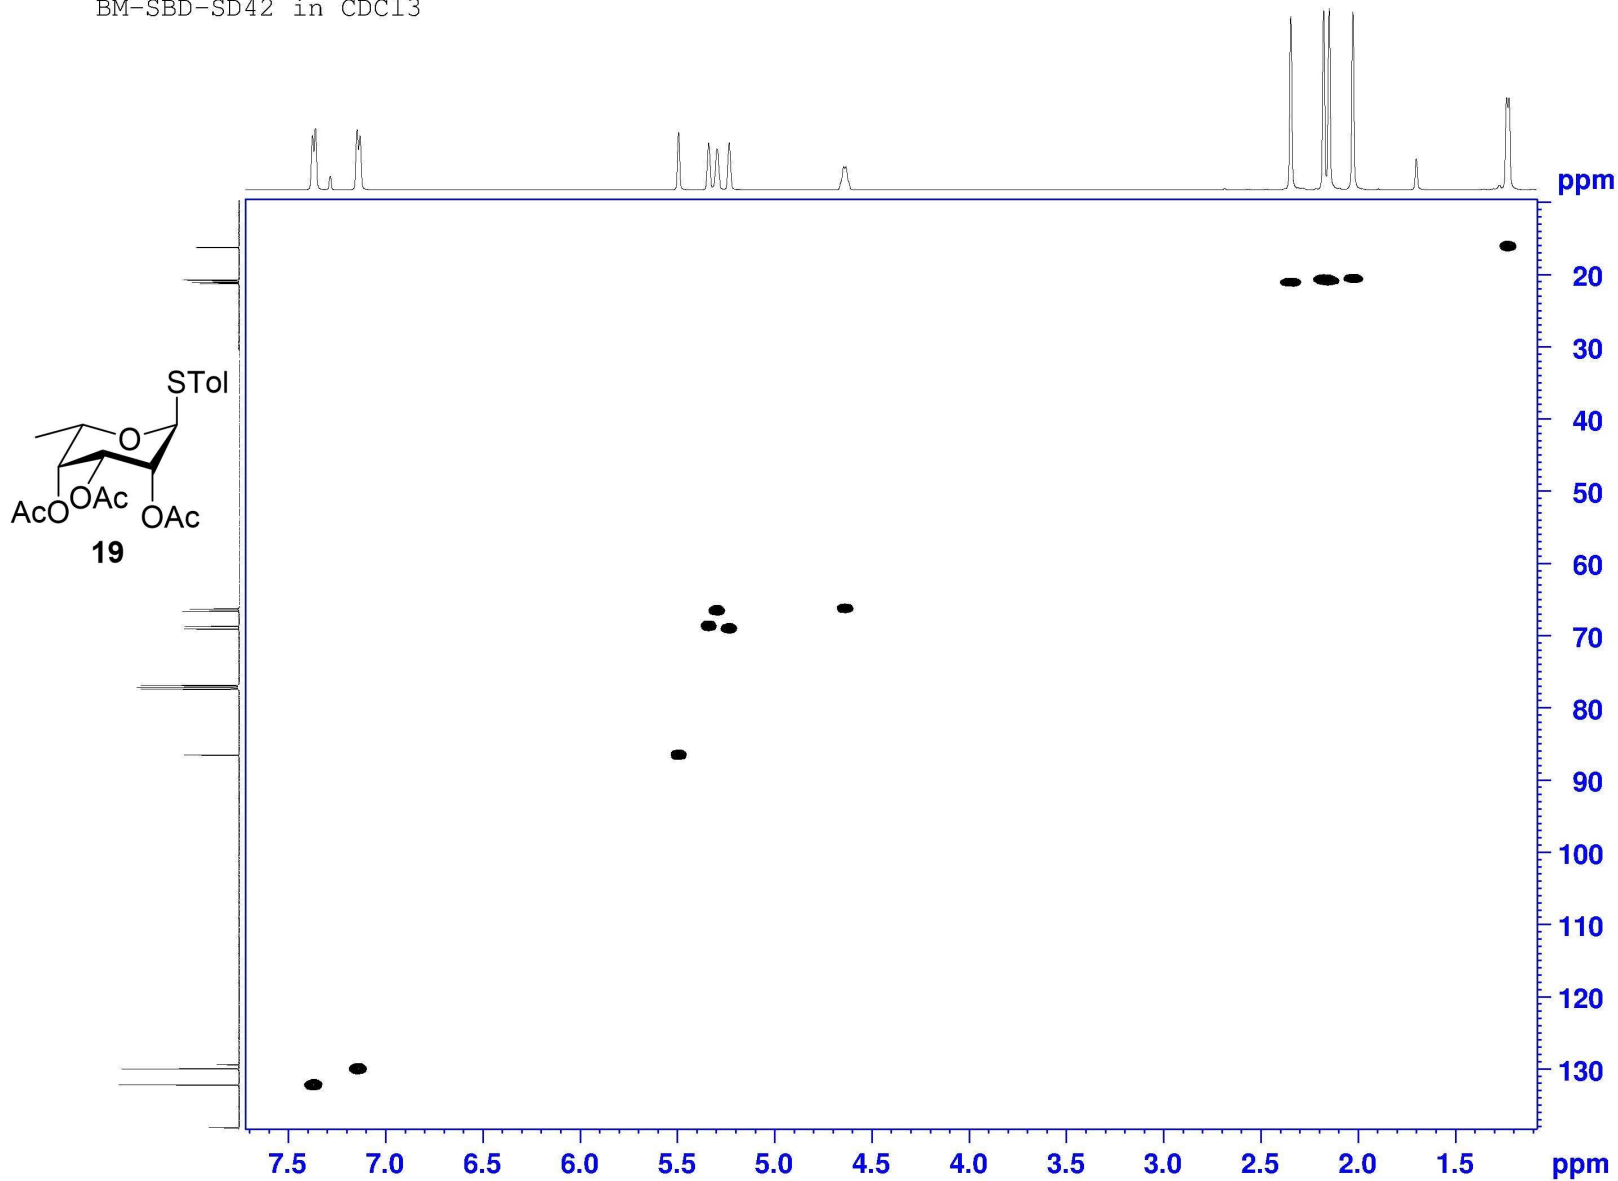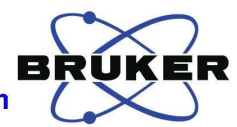

```

Current Data Parameters
NAME      BM-SBD-SD42
EXPNO    852
PROCNO   1

F2 - Acquisition Parameters
Date_    20230518
Time     2.07 h
INSTRUM  AV4 500MHz
PROBHD   2119467.0011 (
PULPROG  hsqcetgps12
TD       1024
SOLVENT  CDCl3
NS       8
DS       16
SWH      10000.000 Hz
FIDRES   19.531250 Hz
AQ       0.0512000 sec
RG       301
DM       50.000 usec
DE       6.50 usec
TE       297.8 K
CNST2    146.0000000
D0       0.0000300 sec
D1       1.300000000 sec
D4       0.00172414 sec
D11      0.030000000 sec
D16      0.000200000 sec
D24      0.0008207 sec
INO      0.00001807 sec
TDav     1
ZGPGTNS
SFOL     500.1430000 MHz
NUCL     1H
P1       14.00 usec
P2       28.00 usec
P28      0 usec
PLML     13.47399998 W
SFO2     125.7726791 MHz
NUC2     13C
CPDPRG2  gacp
P3       15.00 usec
P4       20.00 usec
PCPD2    70.00 usec
PLM2     77.33000183 W
PLML2    1.57819998 W
GPNAM[1] SMSQ10.100
GP21     80.00 %
GPNAM[2] SMSQ10.100
GP22     20.10 %
GPNAM[3] SMSQ10.100
GP23     11.00 %
GPNAM[4] SMSQ10.100
GP24     -5.00 %
P16     1000.00 usec
P19     600.00 usec

F1 - Acquisition parameters
TD       256
SFOL     125.7729 MHz
FIDRES   216.188171 Hz
SW       220.016 ppm
FMODE    Echo-Antiecho

F2 - Processing parameters
SI       1024
SF       500.1400000 MHz
WDW      QSIINE
SSB      2
LB       0 Hz
GB       0
PC       1.40

F1 - Processing parameters
SI       1024
MC2      echo-antiecho
SF       125.7603030 MHz
WDW      QSIINE
SSB      2
LB       0 Hz
GB       0
  
```

GROUP BM  
BM-SBD-SD46 in CDCl3

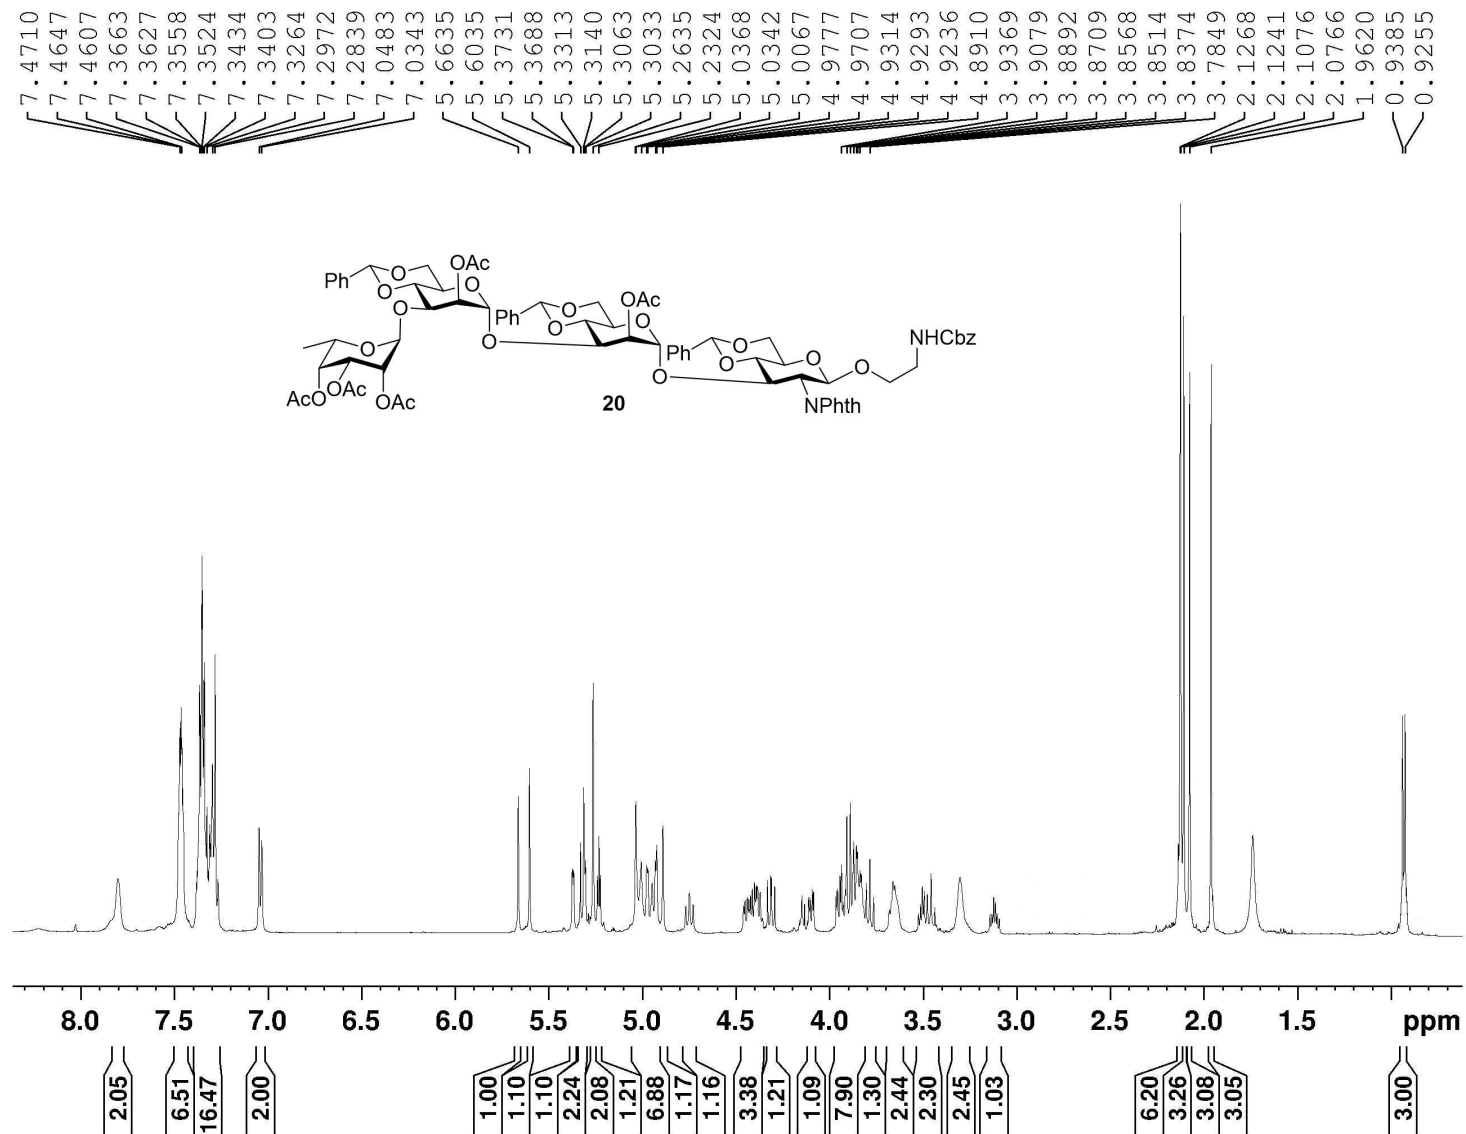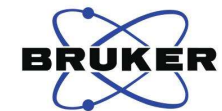

Current Data Parameters  
NAME BM-SBD-SD46  
EXPNO 960  
PROCNO 1

F2 - Acquisition Parameters  
Date\_ 20230707  
Time 2.59 h  
INSTRUM AV4 500MHz  
PROBHD Z119467\_0011 (   
PULPROG zg30  
TD 65536  
SOLVENT CDCl3  
NS 64  
DS 2  
SWH 12500.000 Hz  
FIDRES 0.381470 Hz  
AQ 2.6214399 sec  
RG 101  
DW 40.000 usec  
DE 7.61 usec  
TE 300.8 K  
D1 1.00000000 sec  
TD0 1  
SF01 500.1430884 MHz  
NUC1 1H  
P0 4.67 usec  
P1 14.00 usec  
PLW1 13.47399998 W

F2 - Processing parameters  
SI 65536  
SF 500.1400000 MHz  
WDW EM  
SSB 0  
LB 0.30 Hz  
GB 0  
PC 1.00

GROUP BM  
BM-SBD-SD46 in CDCl3

170.59  
169.89  
169.71  
169.69  
169.25

137.40  
136.94  
136.74  
136.47  
134.47  
131.07  
128.49  
128.20  
128.14  
128.07  
127.97  
127.77  
126.17  
126.04  
125.97  
101.98  
101.11  
100.75  
99.26  
98.94  
98.73  
95.73  
82.51  
78.33  
77.29  
77.04  
76.78  
76.54  
72.35  
70.73  
70.32  
70.20  
69.16  
68.65  
68.47  
68.11  
67.96  
66.72  
66.60  
66.10  
65.96  
64.79  
64.50  
64.11  
55.01  
40.92

20.89  
20.71  
20.70  
20.64  
15.58

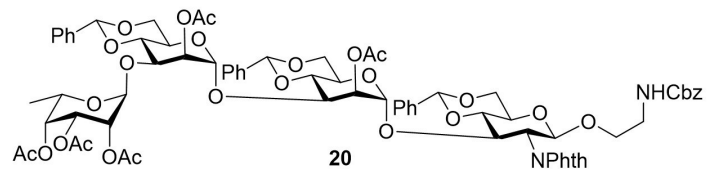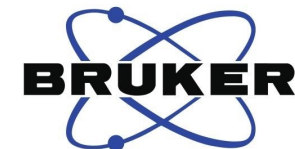

Current Data Parameters  
NAME BM-SBD-SD46  
EXPNO 963  
PROCNO 1

F2 - Acquisition Parameters  
Date\_ 20230707  
Time 7.11 h  
INSTRUM AV4 500MHz  
PROBHD Z119467\_0011 (zggg30)  
PULPROG zgpg30  
TD 65336  
SOLVENT CDCl3  
NS 3072  
DS 4  
SWH 31250.000 Hz  
FIDRES 0.953674 Hz  
AQ 1.0485760 sec  
RG 101  
DW 16.000 usec  
DE 6.50 usec  
TE 301.9 K  
D1 2.00000000 sec  
D11 0.03000000 sec  
TD0 1  
SFO1 125.7728791 MHz  
NUC1 13C  
P0 3.33 usec  
P1 10.00 usec  
PLW1 77.33000183 W  
SFO2 500.1420006 MHz  
NUC2 1H  
CPDPRG[2] waltz65  
PCPD2 80.00 usec  
PLW2 13.47399998 W  
PLW12 0.41264001 W  
PLW13 0.20756000 W

F2 - Processing parameters  
SI 32768  
SF 125.7603030 MHz  
WDW EM  
SSB 0  
LB 1.00 Hz  
GB 0  
PC 1.40

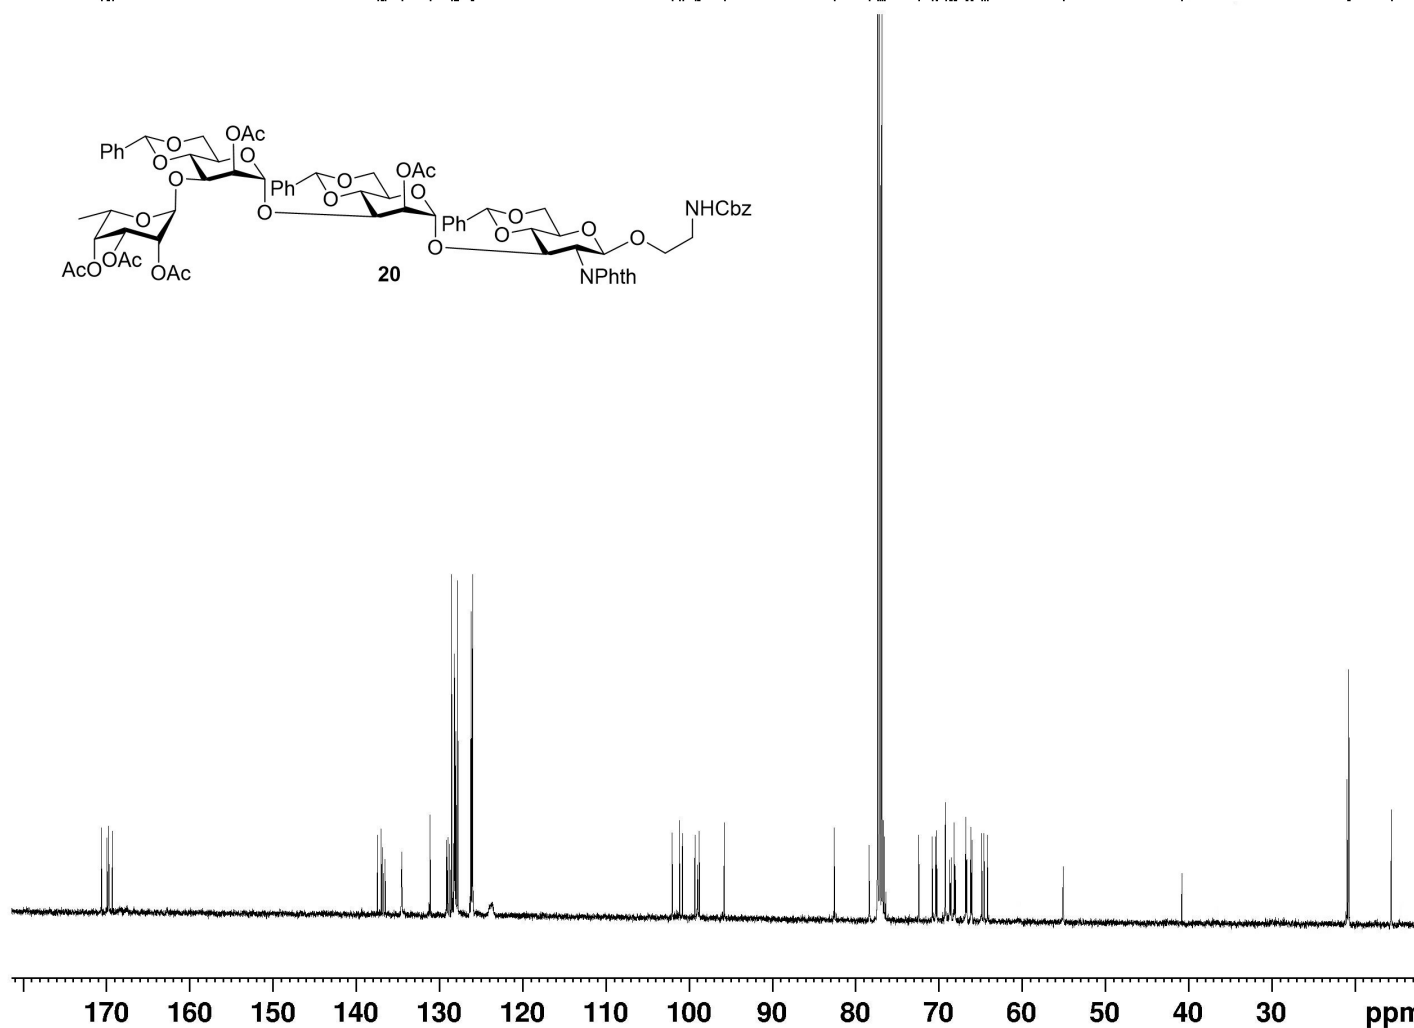

GROUP BM  
BM-SBD-SD46 in CDCl3

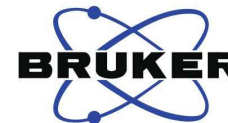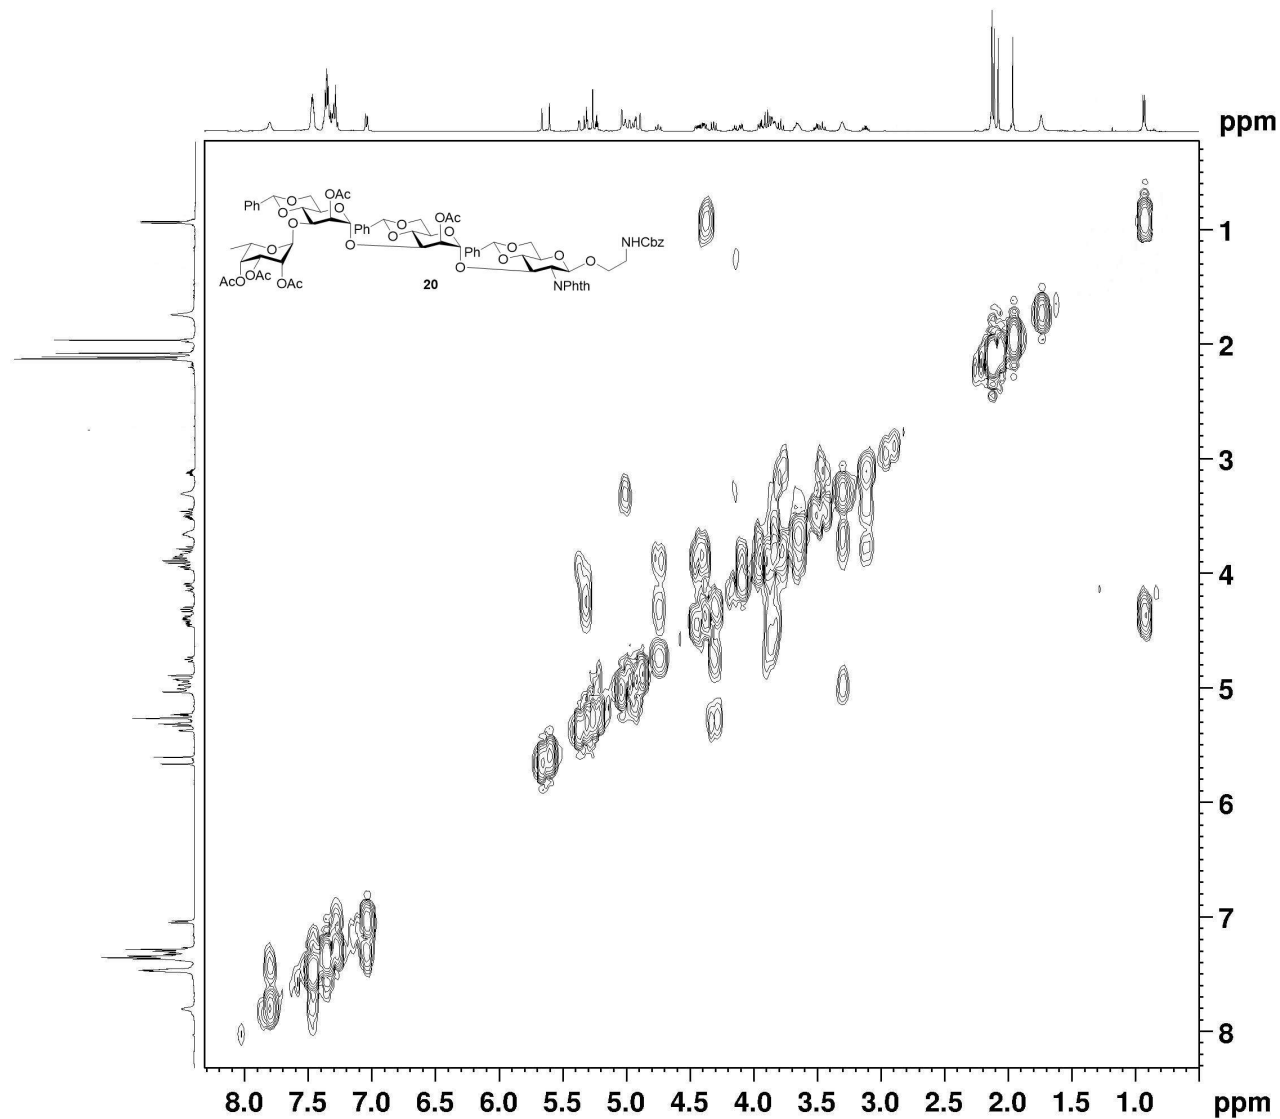

```
Current Data Parameters
NAME      BM-SBD-SD46
EXPNO    961
PROCNO    1

F2 - Acquisition Parameters
Date_    20230707
Time     3.36 h
INSTRUM  AV4 500MHz
PROBHD   Z119467_0011 (
PULPROG  cosygpppqf
TD       2048
SOLVENT  CDCl3
NS       8
DS       16
SWH      12500.000 Hz
FIDRES   12.207031 Hz
AQ       0.0819200 sec
RG       64
DW       40.000 usec
DE       6.50 usec
TE       300.8 K
DO       0.00000300 sec
DL       2.00000000 sec
D11      0.03000000 sec
D12      0.00002000 sec
D13      0.00000400 sec
D16      0.00020000 sec
IN0      0.00007997 sec
TDAV     1
SFO1     500.1430008 MHz
NUC1     1H
P0       14.00 usec
P1       14.00 usec
P17      2500.00 usec
PLW1     13.47399998 W
PLW10    2.93440008 W
GENAM(L) SMSQ10.100
GEZ1     10.00 %
P16      1000.00 usec

F1 - Acquisition parameters
TD       128
SFO1     500.143 MHz
FIDRES   195.373550 Hz
SW       25.001 ppm
FnMODE   QF

F2 - Processing parameters
SI       1024
SF       500.1400000 MHz
WDW      QSINE
SSB      0
LB       0 Hz
GB       0
PC       1.40

F1 - Processing parameters
SI       1024
MC2      QF
SF       500.1400000 MHz
WDW      QSINE
SSB      0
LB       0 Hz
GB       0
```



GROUP BM  
 BM-SBD-SD46 in CDC13

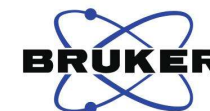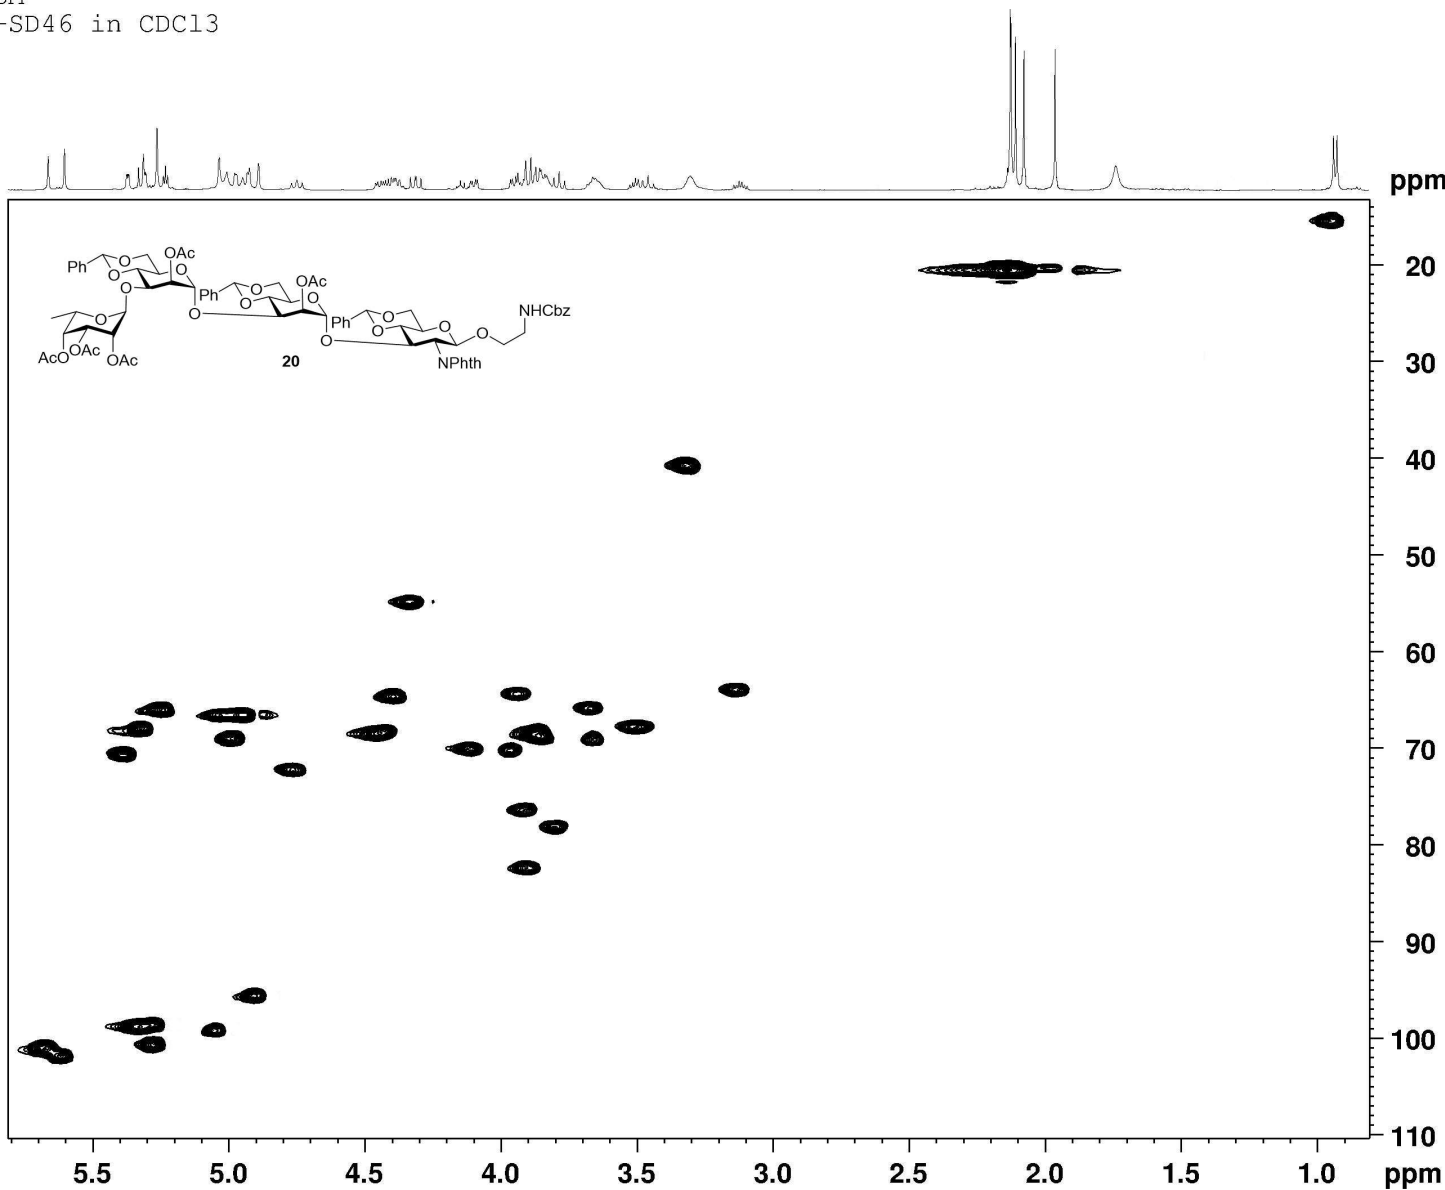

```

Current Data Parameters
NAME      BM-SBD-SD46
EXPNO    362
PROCNO    1

F2 - Acquisition Parameters
Date_    20230707
Time     4.20 h
INSTRUM  AV4 500MHz
PROBHD   E119667_001L1
PULPROG  hugcoqzgq12
TD       1024
SOLVENT  CDC13
NS       6
DS       16
SWH      12500.000 Hz
FIDRES   24.414062 Hz
AQ       0.0409600 sec
RG       101
CW       40.000 usec
DE       6.50 usec
TE       300.1 K
CNS2     145.0000000
DD       0.000000000 sec
D1       1.500000000 sec
D4       0.00172414 sec
D11      0.030000000 sec
D16      0.000200000 sec
D24      0.00086207 sec
DNO      0.00001590 sec
TD0V     1
ZSOPFMS

SFO1     500.1430884 MHz
NUC1     13C
P1       14.00 usec
P2       28.00 usec
P28      0 usec
PLW1     13.47399998 W
SFO2     125.7728790 MHz
MUC2     13C
CDEPRG(2)  gmgp
P3       10.00 usec
P4       20.00 usec
PCPD2    70.00 usec
PLW2     77.33000183 W
PLW12    1.57819398 W
GPNAM(1) SMOQ10.100
GPE1     80.00 %
GPNAM(2) SMOQ10.100
GPE2     20.10 %
GPNAM(3) SMOQ10.100
GPE3     11.00 %
GPNAM(4) SMOQ10.100
GPE4     -5.00 %
P15      1000.00 usec
P19      600.00 usec

F1 - Acquisition parameters
TD       256
SFO1     125.7729 MHz
FIDRES   245.676102 Hz
SW       250.0246 ppm
FMODE    Echo-Antiecho

F2 - Processing parameters
SI       1024
SF       500.1400000 MHz
WDW      DSINE
SSB      2
LB       0 Hz
GB       0
PC       1.00

F1 - Processing parameters
SI       1024
MC2      echo-antiecho
SF       125.7728790 MHz
WDW      DSINE
SSB      2
LB       0 Hz
GB       0
  
```

GROUP BM  
 BM-SBD-SD48 in CDCl3

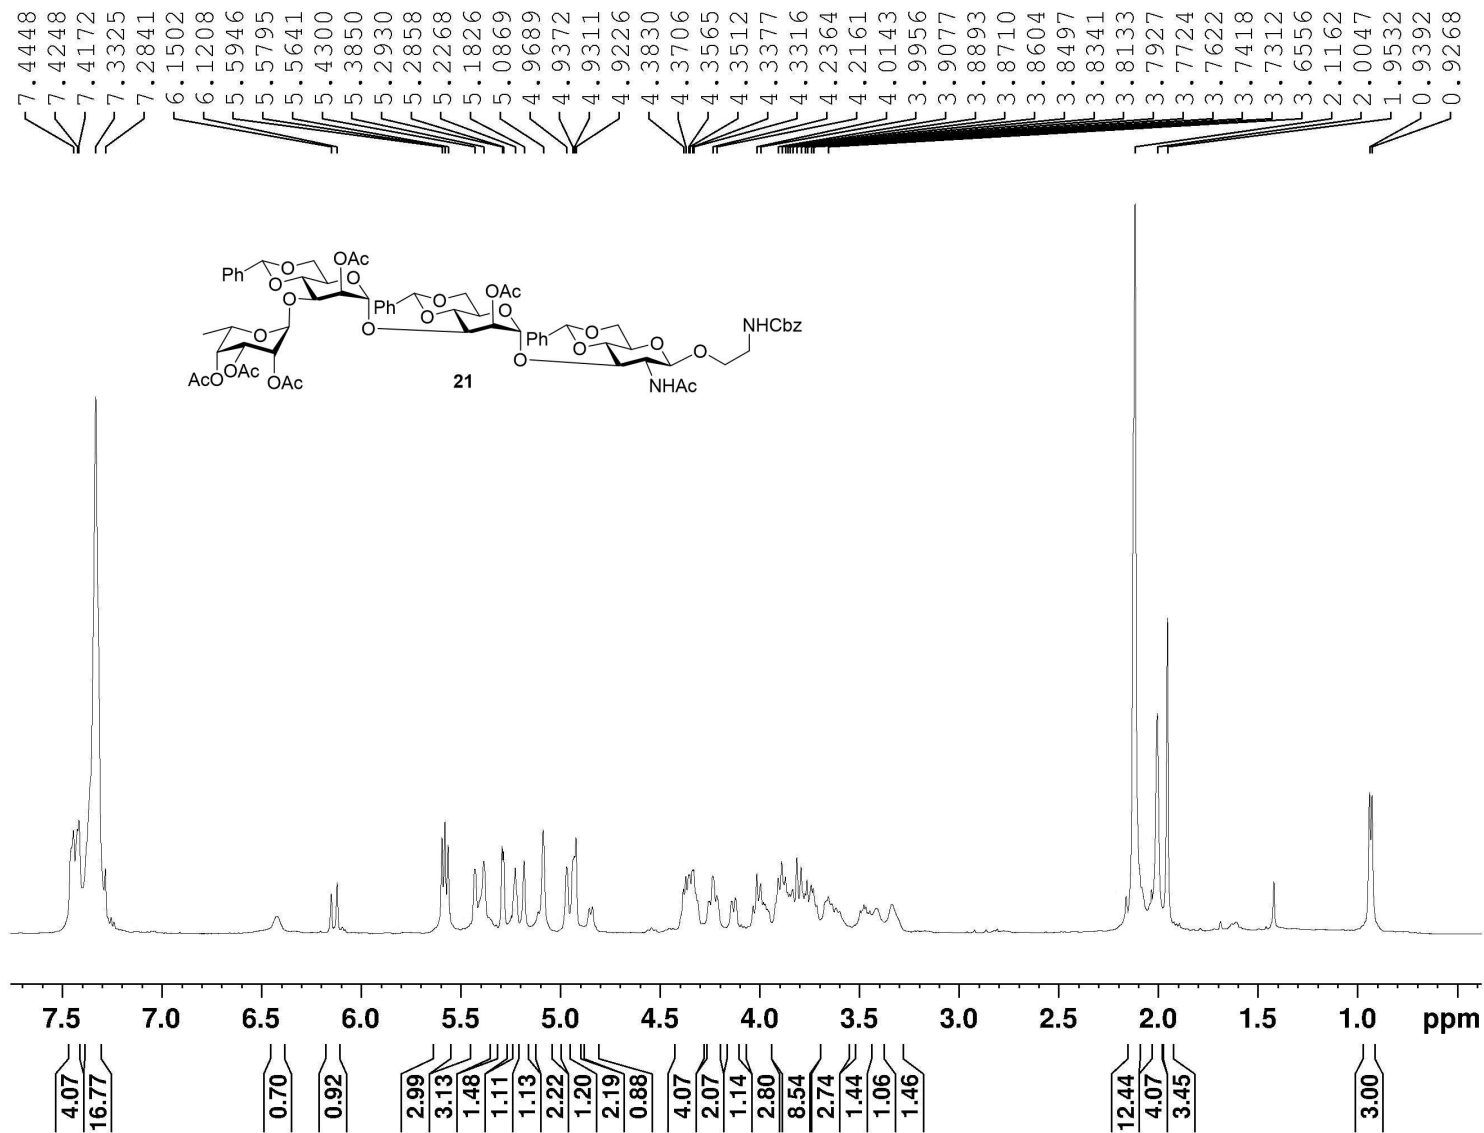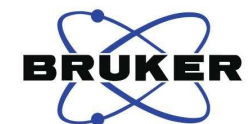

Current Data Parameters  
 NAME BM-SBD-SD48 (NHAc)  
 EXPNO 920  
 PROCNO 1

F2 - Acquisition Parameters  
 Date\_ 20230715  
 Time 1.51 h  
 INSTRUM AV4 500MHz  
 PROBH0 2119467\_0011 ( )  
 PULPROG zg30  
 TD 65536  
 SOLVENT CDCl3  
 NS 64  
 DS 2  
 SWH 10000.000 Hz  
 FIDRES 0.305176 Hz  
 AQ 3.2767999 sec  
 RG 57.7778  
 DW 50.000 usec  
 DE 10.11 usec  
 TE 297.4 K  
 D1 1.0000000 sec  
 TD0 1  
 SFO1 500.1430884 MHz  
 NUC1 1H  
 PO 4.67 usec  
 P1 14.00 usec  
 PLW1 13.47399998 W

F2 - Processing parameters  
 SI 65536  
 SF 500.1400000 MHz  
 WDW EM  
 SSB 0  
 LB 0.30 Hz  
 GB 0  
 PC 1.00

GROUP BM  
BM-SBD-SD48 in CDCl<sub>3</sub>

170.62  
169.93  
169.73  
169.37  
168.36  
168.15

137.35  
137.08  
136.88  
136.55  
129.12  
128.92  
128.51  
128.21  
128.16  
128.07  
126.15  
125.99  
125.95

101.96  
101.49  
100.91  
99.43  
98.68  
98.04  
95.74

78.94  
70.88  
70.81  
70.20  
69.14  
68.98  
68.64  
68.57  
68.49  
68.15  
66.71  
66.65  
66.09  
65.69  
64.77  
64.52  
63.81  
53.47  
40.78

20.92  
20.78  
20.73  
20.72  
20.66  
15.60

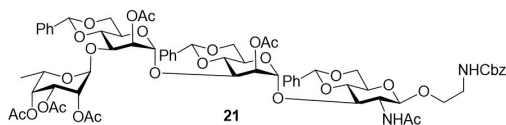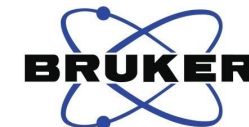

Current Data Parameters  
NAME BM-SBD-SD48 (NHAc)  
EXPNO 923  
PROCNO 1

F2 - Acquisition Parameters  
Date\_ 20230715  
Time 6.42 h  
INSTRUM AV4 500MHz  
PROBHD Z119467\_0011 (4  
PULPROG zgpg30  
TD 65536  
FIDRES 0.919204 Hz  
AQ 1.0878977 sec  
RG 101  
DW 16.600 usec  
DE 6.50 usec  
TE 297.8 K  
D1 2.0000000 sec  
D11 0.0300000 sec  
TD0 1  
SFO1 125.7728791 MHz  
NUC1 15C  
PO 3.33 usec  
P1 10.00 usec  
PLW1 77.33000183 W  
SFO2 500.1420006 MHz  
NUC2 1H  
CPDPRG2 waltz65  
PCPD2 80.00 usec  
PLW2 13.47399998 W  
PLW12 0.41264001 W  
PLW13 0.20756000 W

F2 - Processing parameters  
SI 32768  
SF 125.7603030 MHz  
WDW EM  
SSB 0  
LB 1.00 Hz  
GB 0  
PC 1.40

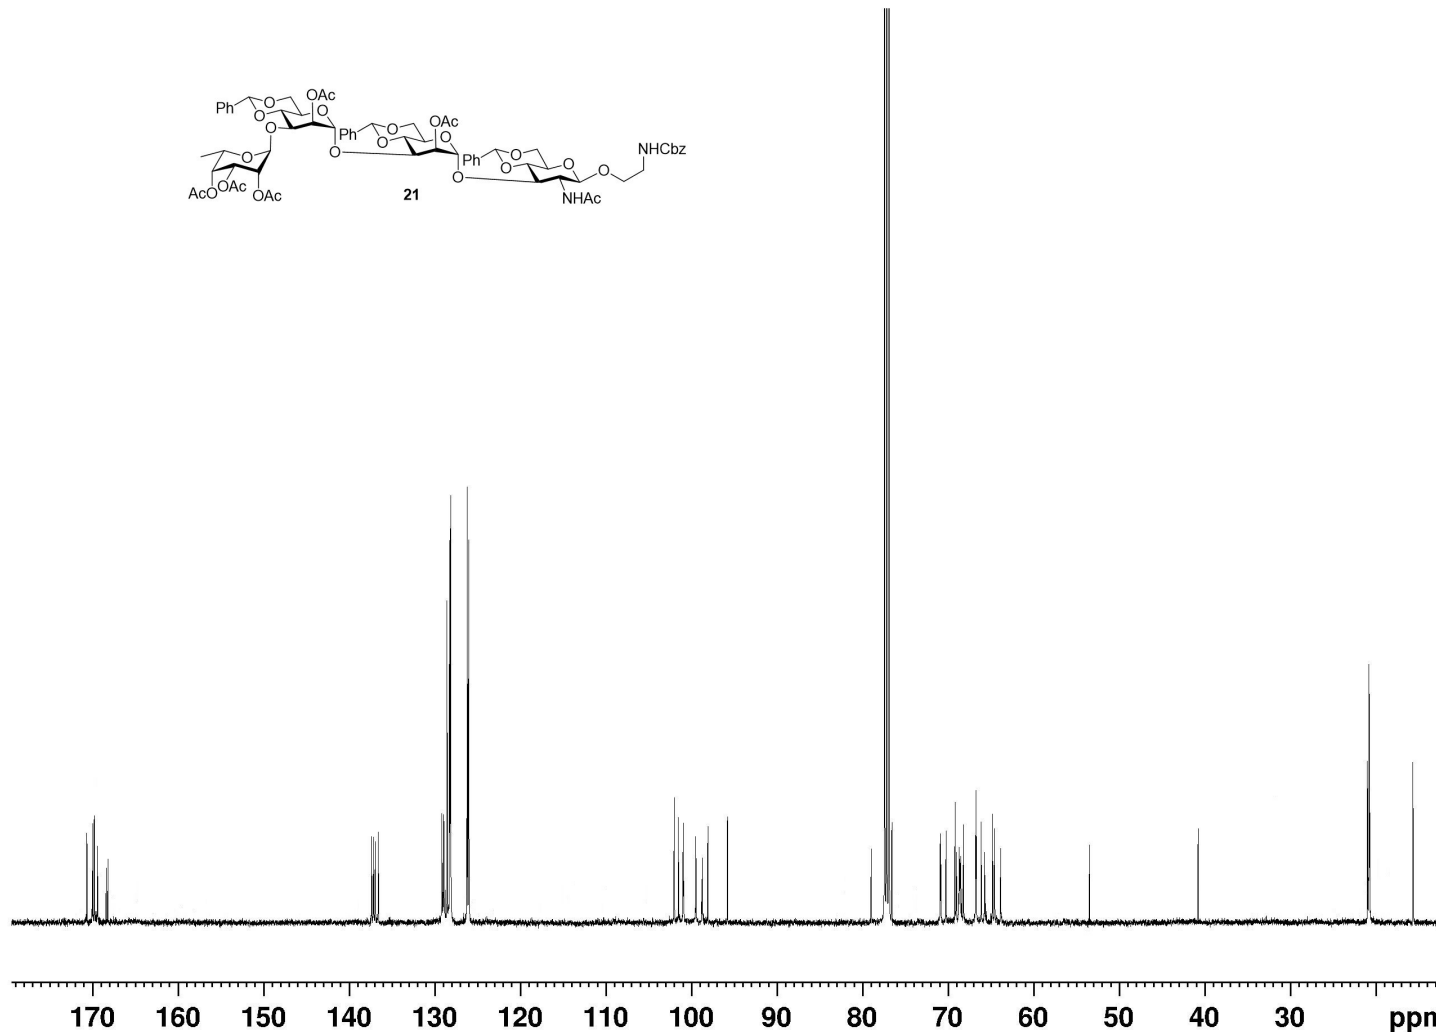

GROUP BM  
BM-SBD-SD48 in CDCl3

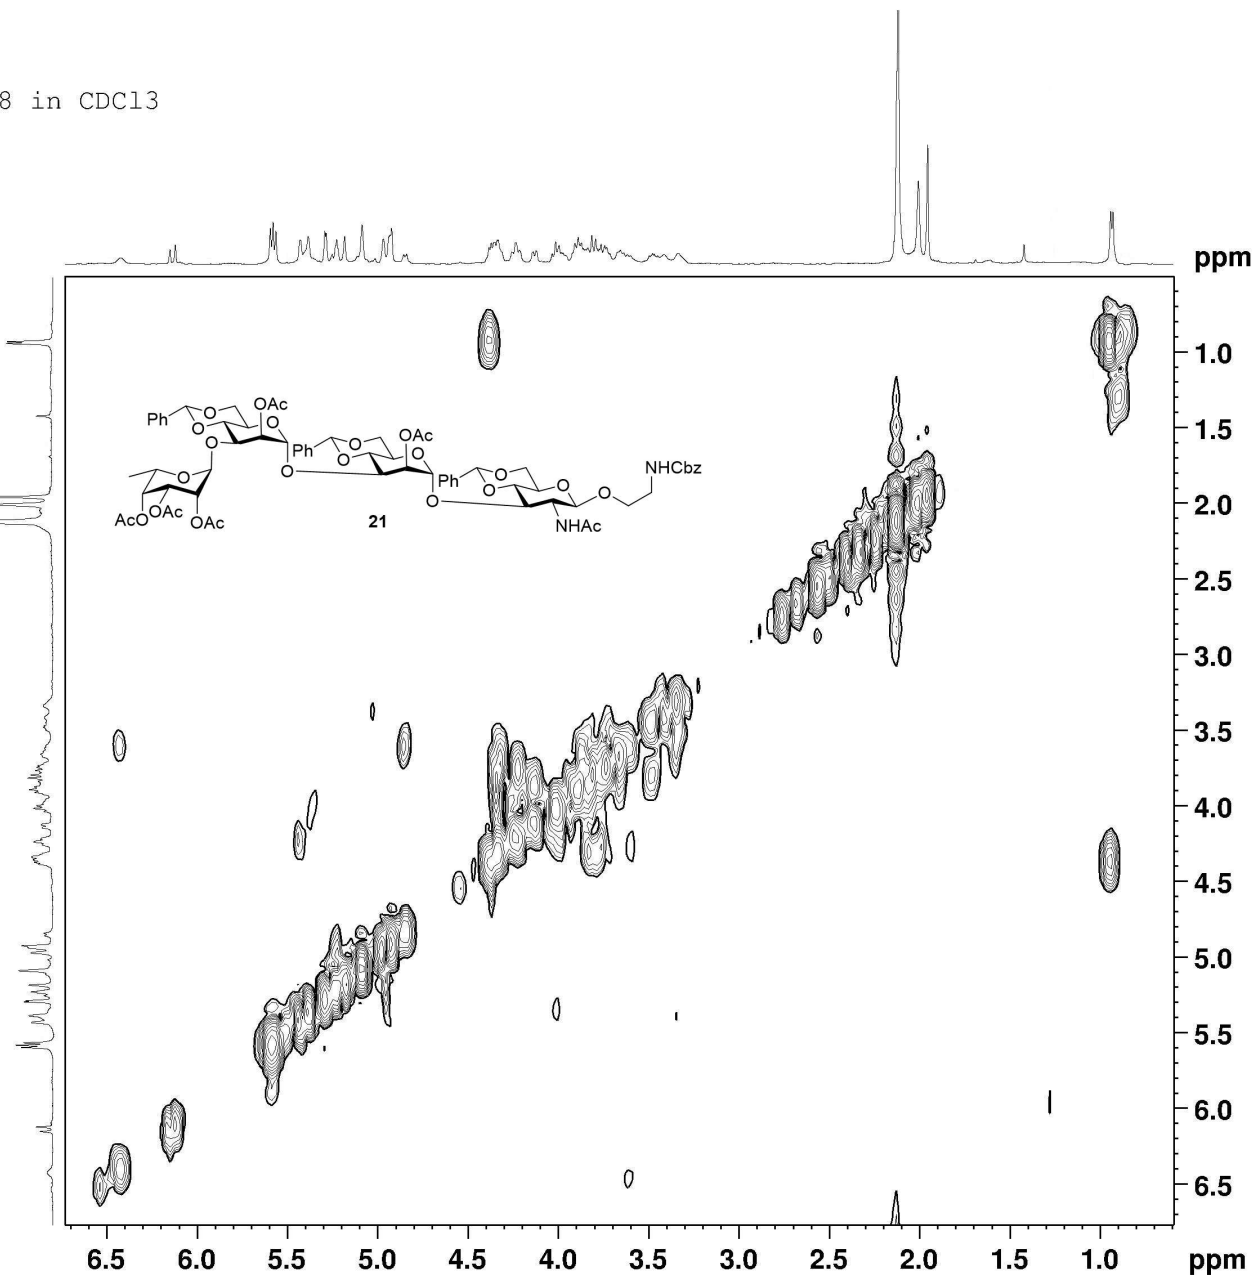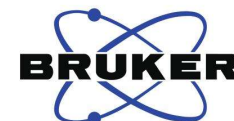

```
Current Data Parameters
NAME   BM-SBD-SD48 (NHAc)
EXPNO  921
PROCNO  1

F2 - Acquisition Parameters
Date_  20220713
Time    3.06 h
INSTRUM AV4 500MHz
PROBHD  Z119467_0011 (
PULPROG cosyygpgpgz
TD      65536
SOLVENT CDCl3
NS      16
DS      16
SWH     12500.000 Hz
FIDRES  12.267031 Hz
AQ      0.0819200 sec
RG      65
DF      40.000 usec
DE      6.50 usec
TE      297.3 K
DQ      0.00000300 sec
D1      2.0000000 sec
D11     0.0300000 sec
D12     0.0002000 sec
D13     0.0000400 sec
D15     0.0002000 sec
IND     0.0007997 sec
TDav
SF01    500.1430008 MHz
NUC1    1H
PQ      14.00 usec
P1      14.00 usec
P17     2500.00 usec
PLW1    13.47399998 W
PLW10   2.93440008 W
CPDPRG(L) SMCQ14.140
GR21    10.00 %
P16     1000.00 usec

F1 - Acquisition parameters
TD      128
SF01    500.143 MHz
FIDRES  195.373550 Hz
SW      25.001 ppm
FbMODE  QF

F2 - Processing parameters
SI      1.024
SF      500.1400000 MHz
WDW     Q9
SSB     0
LB      0 Hz
GB      0
PC      1.40

F1 - Processing parameters
SI      1.024
MC2     QF
SF      500.1400000 MHz
WDW     Q9
SSB     0
LB      0 Hz
GB      0
```

GROUP BM  
 BM-SBD-SD48 in CDCl3

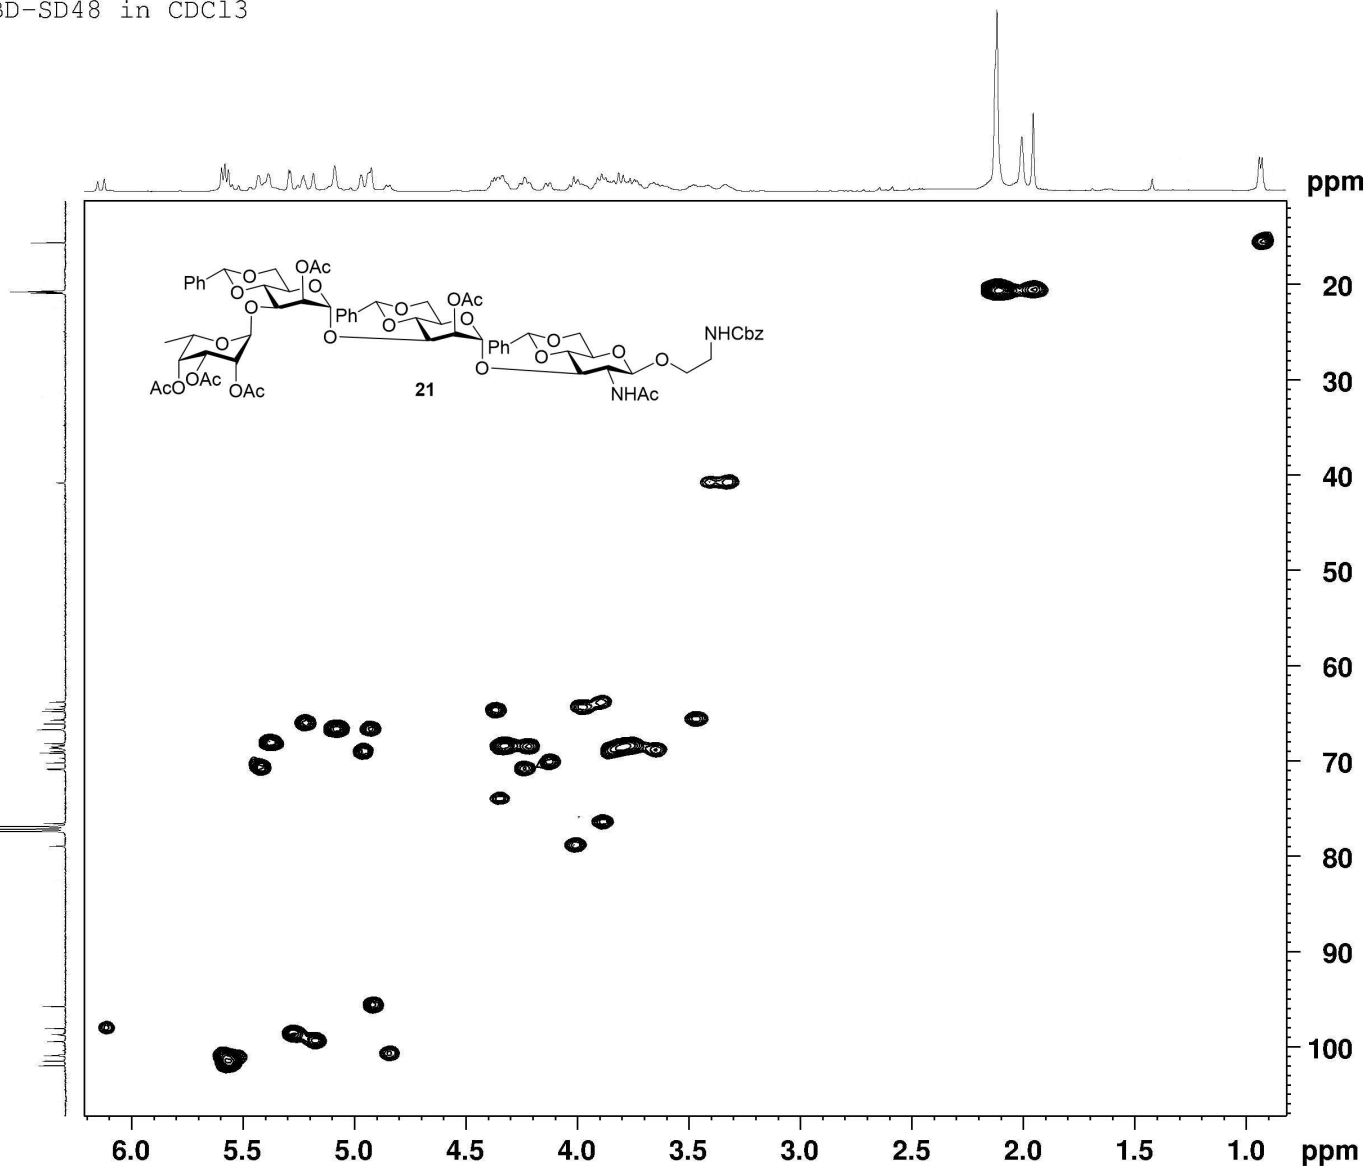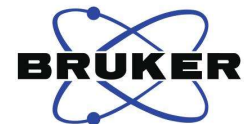

```

Current Data Parameters
NAME BM-SBD-SD48 (00ac)
EXPNO 922
PROCNO 1

F2 - Acquisition Parameters
Date_ 20230715
Time 4.53 h
INSTRUM av4 500MHz
PROBHD zgpg30
PULPROG haqetopg12
TD 1624
SOLVENT cdcl3
NS 166
DS 16
SWH 12500.000 Hz
FIDRES 24.414062 Hz
AQ 0.0489950 sec
RG 101
DM 40.000 usec
DE 6.50 usec
TE 297.1 K
CNS2 145.000000
D0 0.0000000 sec
D1 1.5000000 sec
D4 0.0017244 sec
D11 0.0000000 sec
D14 0.0000000 sec
D24 0.0008207 sec
EN0 0.00001325 sec
TDEV 1
ZGPGPGS
SFO1 500.1430008 MHz
NUC1 13C
P1 14.00 usec
P2 28.00 usec
P3 0 usec
P4 13.4739998 MHz
SFO2 125.7702790 MHz
NUC2 13C
CPOPRG12
gpcp
P3 10.00 usec
P4 20.00 usec
PCPD2 77.33000000 N
P4M12 1.57019998 N
GPMN(1) SMO10.100
GP22 80.10 %
GPMN(2) SMO10.100
GP23 20.10 %
GPMN(3) SMO10.100
GP24 11.00 %
GPMN(4) SMO10.100
GP24 -5.00 %
P16 1500.00 usec
P19 600.00 usec

F1 - Acquisition parameters
TD 256
SFO1 125.7729 MHz
FIDRES 204.161110 Hz
DM 300.032 ppm
PROBHD EchoAnticb2

F2 - Processing parameters
SI 1624
SF 506.1430000 MHz
SOL 2
LB 0 Hz
GB 0
PC 1.40

F1 - Processing parameters
SI 1624
MC2 echo-anticb2
SF 125.7603000 MHz
SOL 2
LB 0 Hz
GB 0
  
```

GROUP BM  
BM-SBD-SD51 in MeOD

5.3182  
5.1448  
5.0315  
4.9329  
4.5138  
4.4474  
4.2770  
4.2647  
4.1961  
4.1487  
3.9332  
3.8811  
3.8603  
3.8188  
3.7731  
3.7452  
3.7241  
3.6224  
3.5557  
3.5422  
3.5059  
3.4522  
3.4465  
3.3289

— 1.9784

< 1.2656  
1.2539

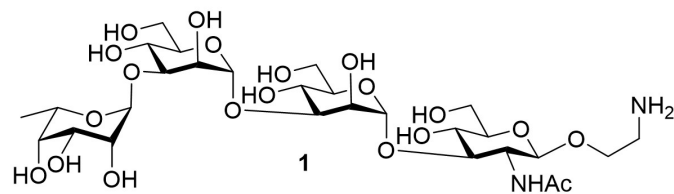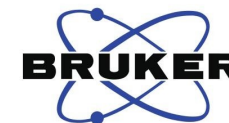

Current Data Parameters  
NAME BM-SBD-SD51  
EXPNO 30  
PROCNO 1

F2 - Acquisition Parameters  
Date\_ 20230728  
Time 10.37 h  
INSTRUM AV4 500MHz  
PROBHD Z119467\_0011 (zg30)  
PULPROG zg30  
TD 40000  
SOLVENT MeOD  
NS 8  
DS 0  
SWH 10000.000 Hz  
FIDRES 0.500000 Hz  
AQ 2.0000000 sec  
RG 42.8911  
DW 50.000 usec  
DE 10.11 usec  
TE 299.7 K  
D1 1.00000000 sec  
TD0 1  
SFO1 500.1430884 MHz  
NUC1 1H  
P0 4.67 usec  
P1 14.00 usec  
PLW1 13.47399998 W

F2 - Processing parameters  
SI 65536  
SF 500.1400000 MHz  
WDW EM  
SSB 0  
LB 0.30 Hz  
GB 0  
PC 1.00

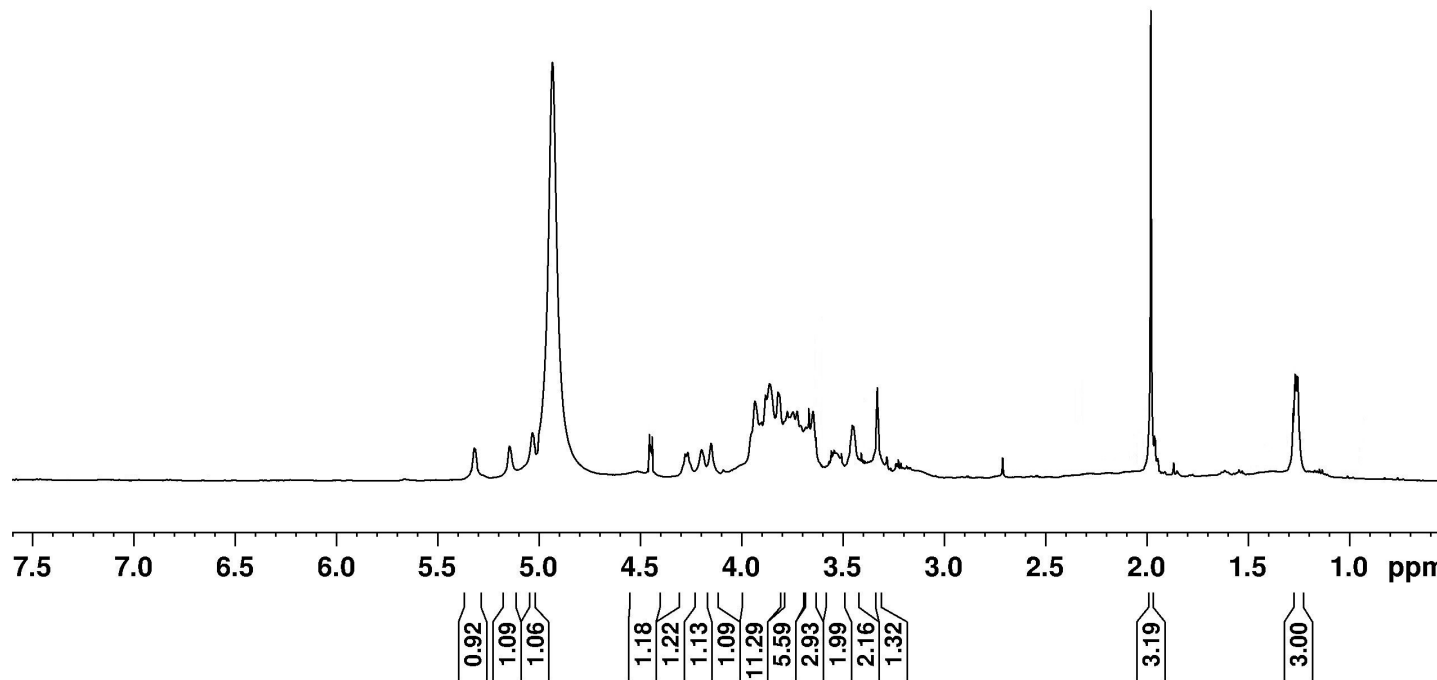

GROUP RS  
RS-SAN-P3 in MEOD

172.4

102.30  
101.18  
100.86  
97.58  
79.62  
79.50  
78.98  
76.39  
75.62  
73.72  
73.66  
73.45  
72.82  
71.08  
70.88  
70.60  
70.20  
66.96  
66.76  
65.85  
65.54  
62.95  
61.51  
61.40  
61.02  
53.85  
48.27  
48.10  
47.93  
47.76  
47.59  
47.42  
47.24  
39.76  
22.34  
18.45

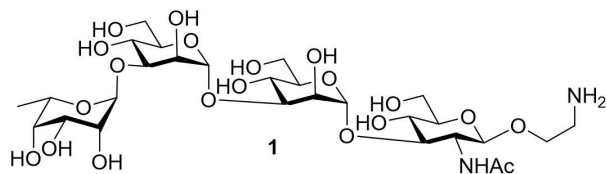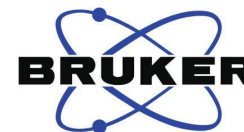

Current Data Parameters  
NAME EM-SBD-SD51M  
EXPNO 880  
PROCNO 1

F2 - Acquisition Parameters  
Date\_ 20230818  
Time 9.41 h  
INSTRUM AV4 500MHz  
PROBHD Z119467\_0011 (4  
PULPROG zgpg30  
TD 65536  
SOLVENT MeOD  
NS 8779  
DS 4  
SWH 30120.482 Hz  
FIDRES 0.919204 Hz  
AQ 1.0878977 sec  
RG 101  
DW 16.600 usec  
DE 6.50 usec  
TE 300.7 K  
D1 2.0000000 sec  
D11 0.0300000 sec  
TD0 1  
SF01 125.7728791 MHz  
NUC1 13C  
P0 3.33 usec  
P1 10.00 usec  
PLW1 77.33000183 W  
SE02 500.1420006 MHz  
NUC2 1H  
CPDPRG[2] waltz65  
PCPD2 80.00 usec  
PLW2 13.47398998 W  
PLW12 0.41264001 W  
PLW13 0.20756000 W

F2 - Processing parameters  
SI 32768  
SF 125.7603030 MHz  
WDW EM  
SSB 0  
LB 1.00 Hz  
GB 0  
PC 1.40

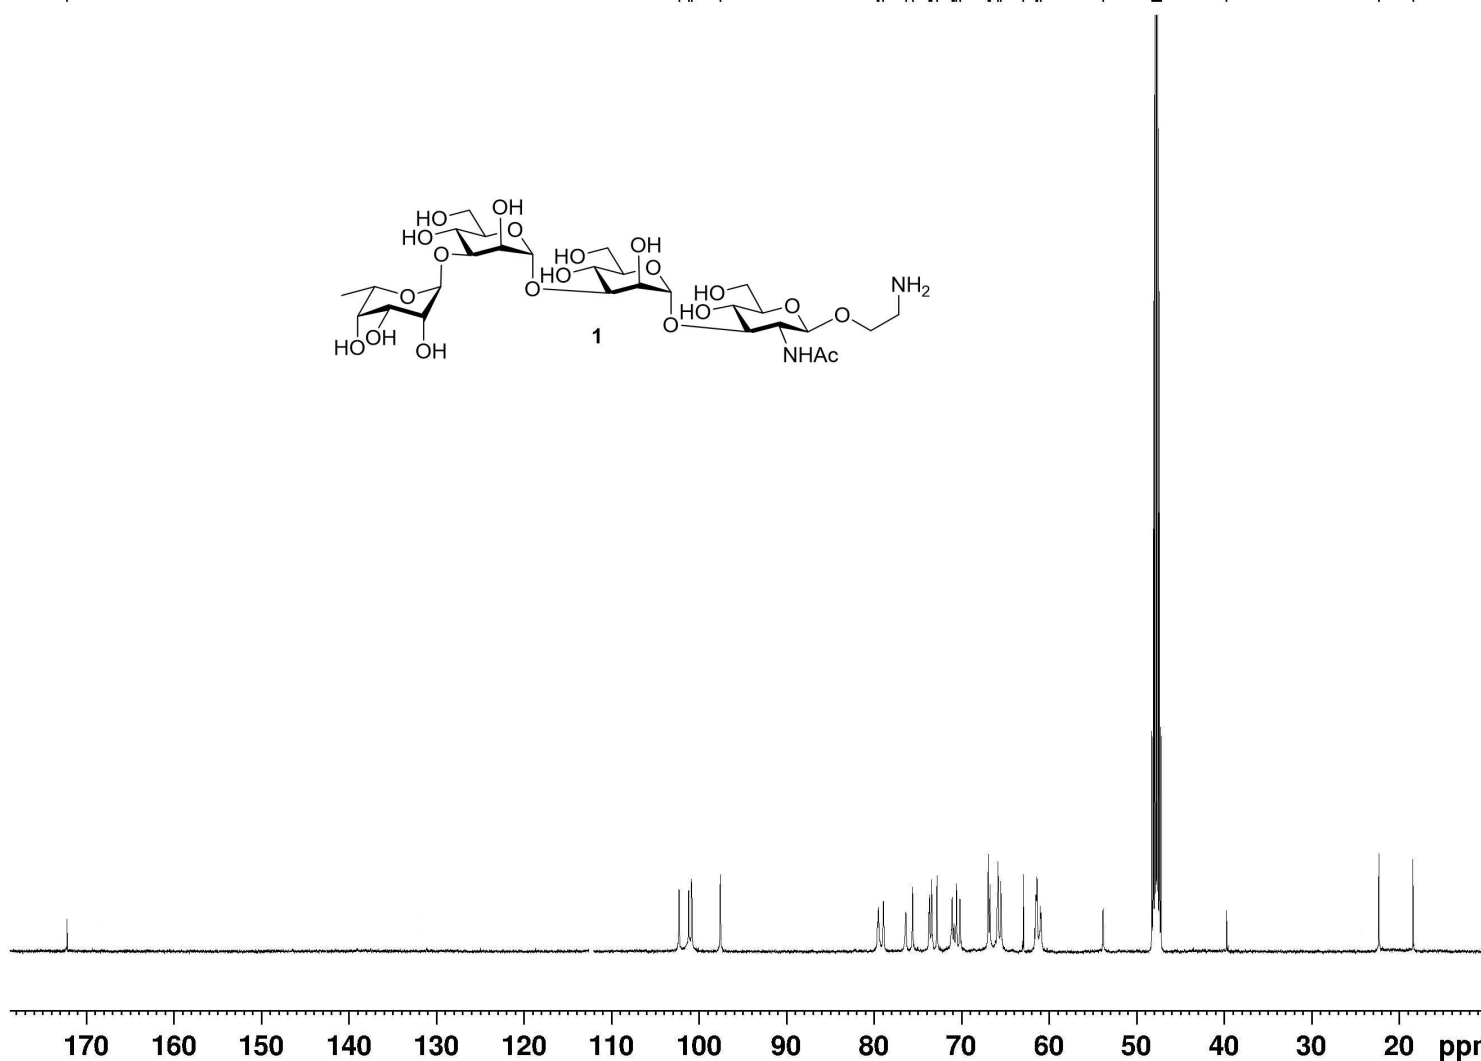

Supplement: d4ob00183d1.pdf [file d4ob00183d1.pdf]
